# Supplementary material for: Synthesis of 3-((4-Hydroxyphenyl)amino)propanoic Acid Derivatives as Promising Scaffolds for the Development of Antimicrobial Candidates Targeting Multidrug-Resistant Bacterial and Fungal Pathogens
Source: MDPI journal article supplement (doi:10.3390/antibiotics13020193), 2024-02-17
Supplement: s1 [file s1]

# Synthesis of 3-((4-hydroxyphenyl)amino)propanoic Acid Derivatives as Promising Scaffolds for the Development of Antimicrobial Candidates Targeting Multidrug-Resistant Bacterial and Fungal Pathogens

Povilas Kavaliauskas <sup>1,2,3,4,5,\*</sup>, Birutė Grybaitė <sup>1</sup>, Birutė Sapijanskaitė-Banevič <sup>1</sup>, Rita Vaickelionienė <sup>1</sup>, Vidmantas Petraitis <sup>2,3,5</sup>, Rūta Petraitienė <sup>3,5</sup>, Ethan Naing <sup>3</sup>, Andrew Garcia <sup>3</sup>, Ramunė Grigalevičiūtė <sup>2,6</sup> and Vytautas Mickevičius <sup>1</sup>

## Supplementary Information

**Content:** Supplemental Figures S1–S66 representing <sup>1</sup>H and <sup>13</sup>C NMR spectra (in DMSO-*d*<sub>6</sub>) of compounds 5–37 and S67 representing mass spectra of compounds 15

*((4-Hydroxyphenyl)azanediyl)dimethyl ester (5)*

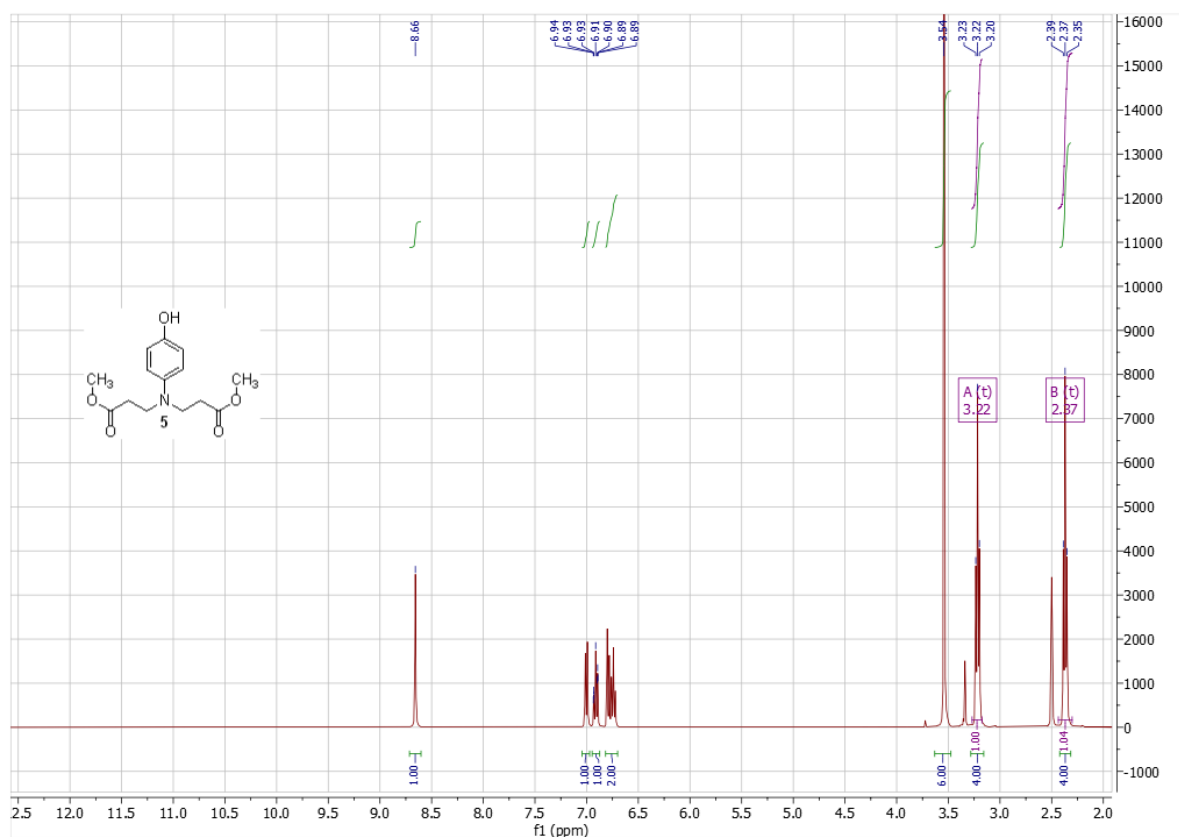

**Figure S1.** <sup>1</sup>H NMR spectrum of compound **5**

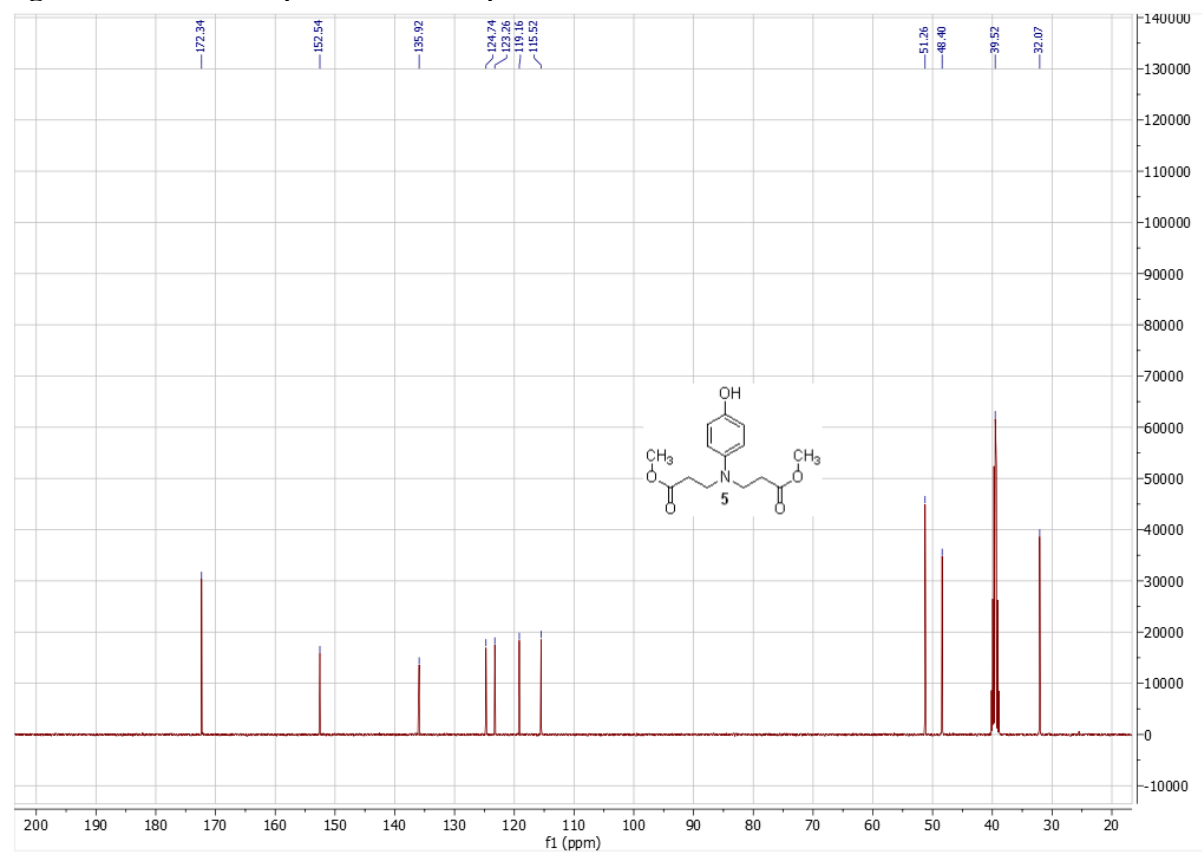

**Figure S2.** <sup>13</sup>C NMR spectrum of compound **5**

*3,3'-((4-Hydroxyphenyl)azanediyl)di(propanehydrazide) (6)*

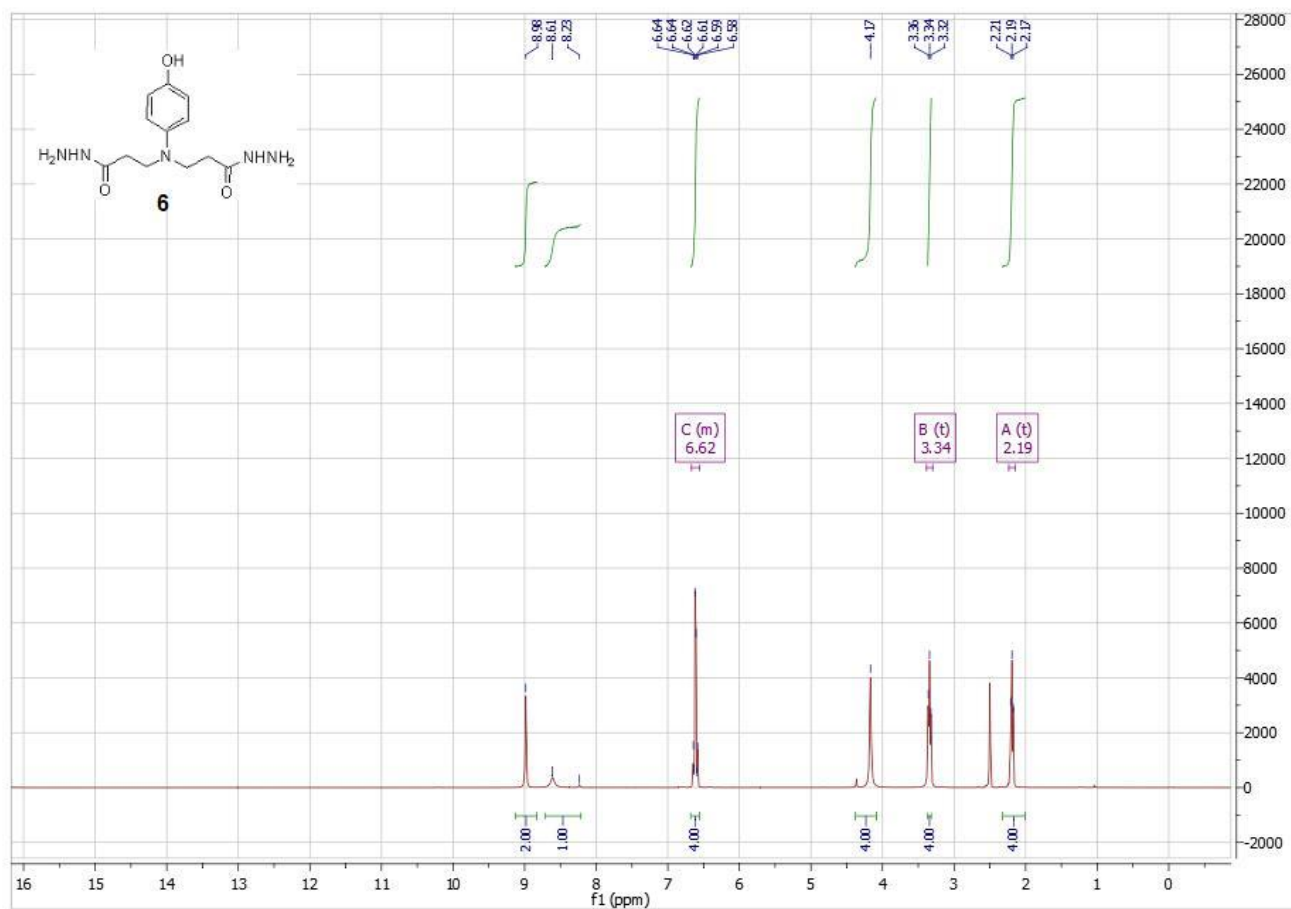

**Figure S3.** <sup>1</sup>H NMR spectrum of compound **6**

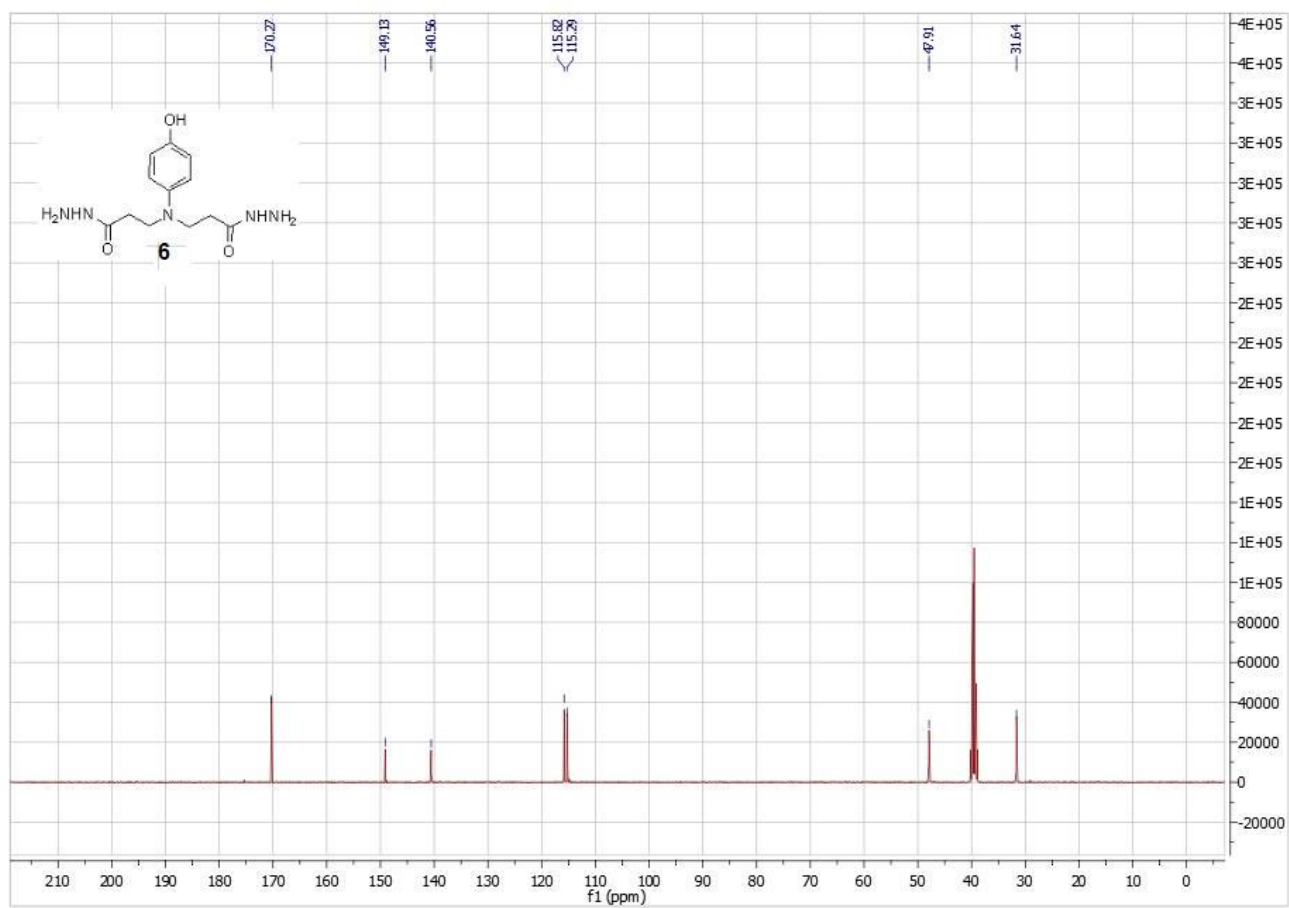

**Figure S4.** <sup>13</sup>C NMR spectrum of compound **6**

*N'*-benzylidene-3-((4-hydroxyphenyl)amino)propanehydrazide (**7**)

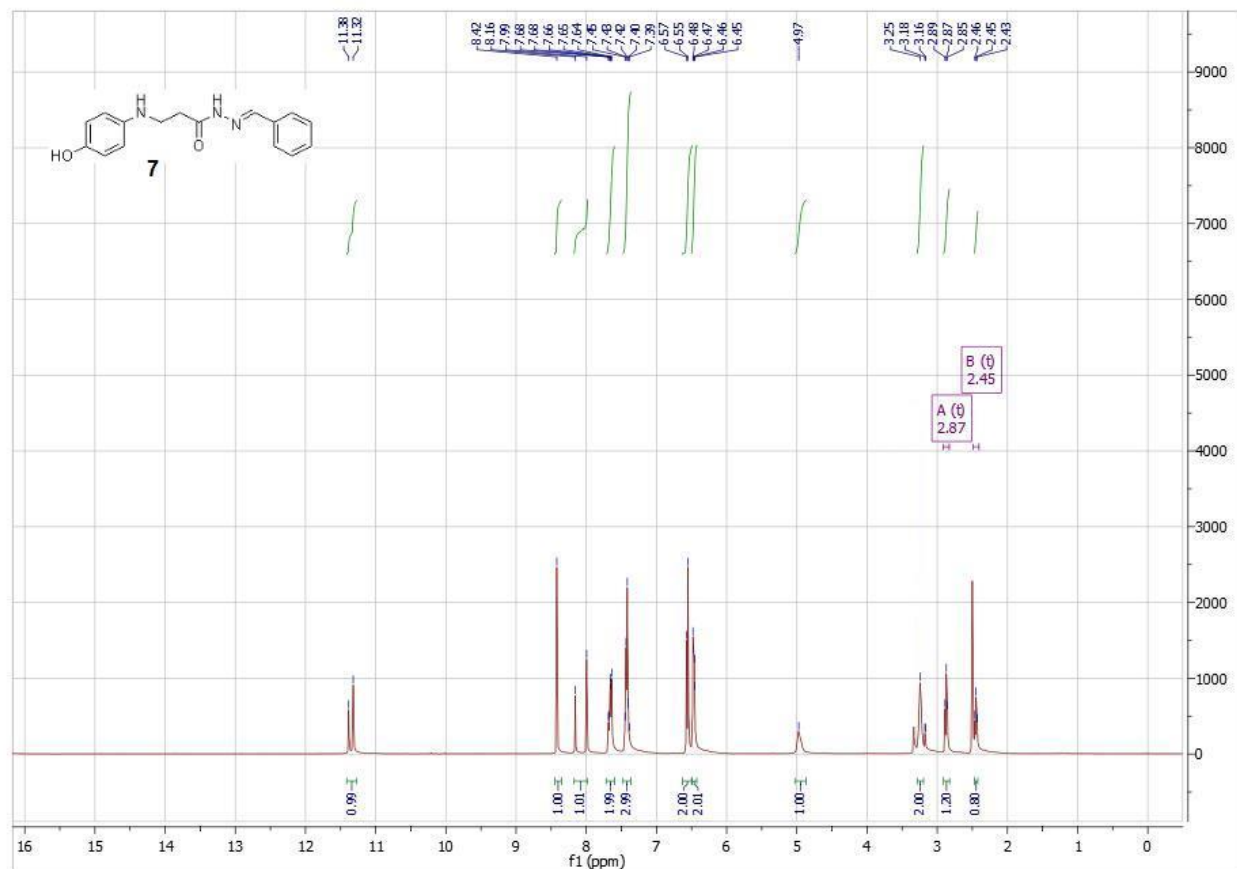

**Figure S5.** <sup>1</sup>H NMR spectrum of compound **7**

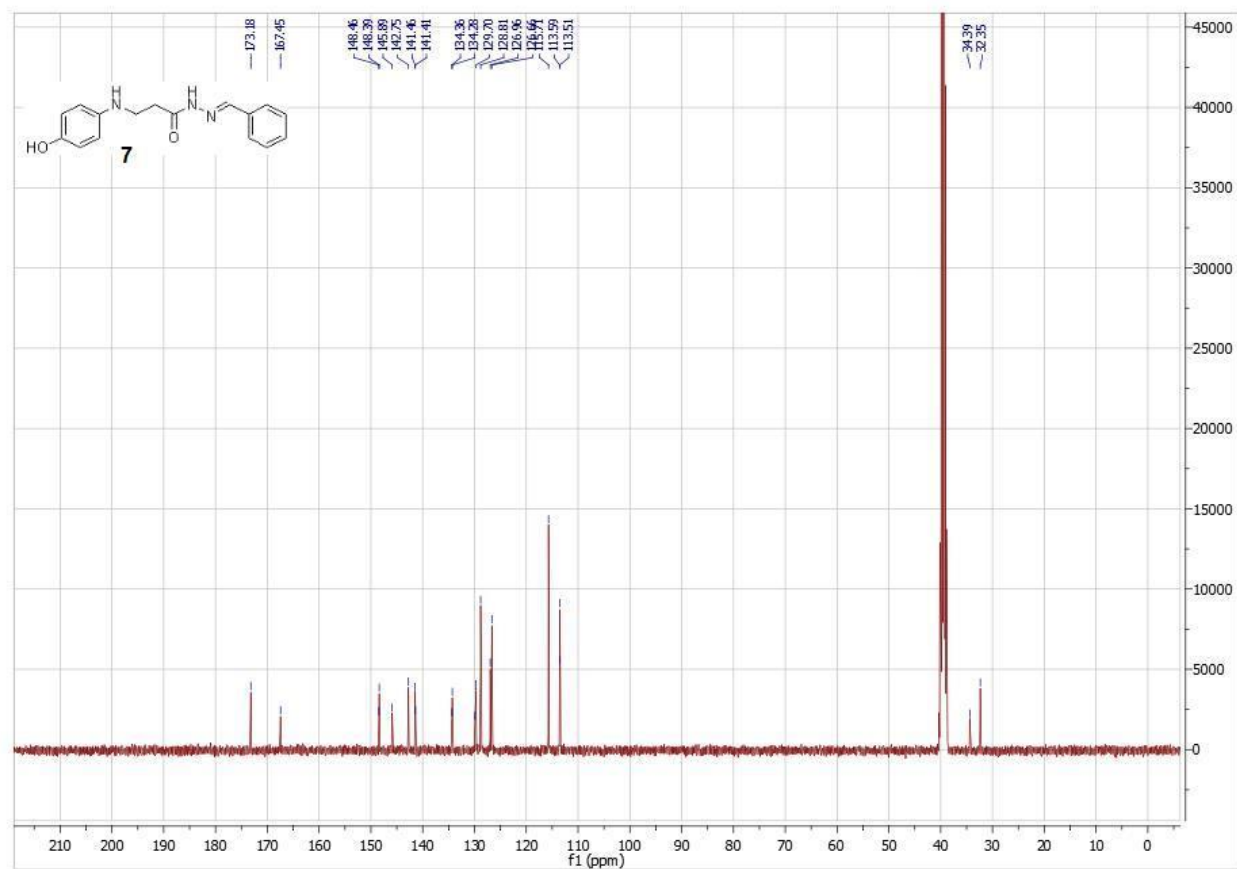

**Figure S6.** <sup>13</sup>C NMR spectrum of compound **7**

3-((4-Hydroxyphenyl)amino)-N'-(4-nitrobenzylidene)propanehydrazide (**8**)

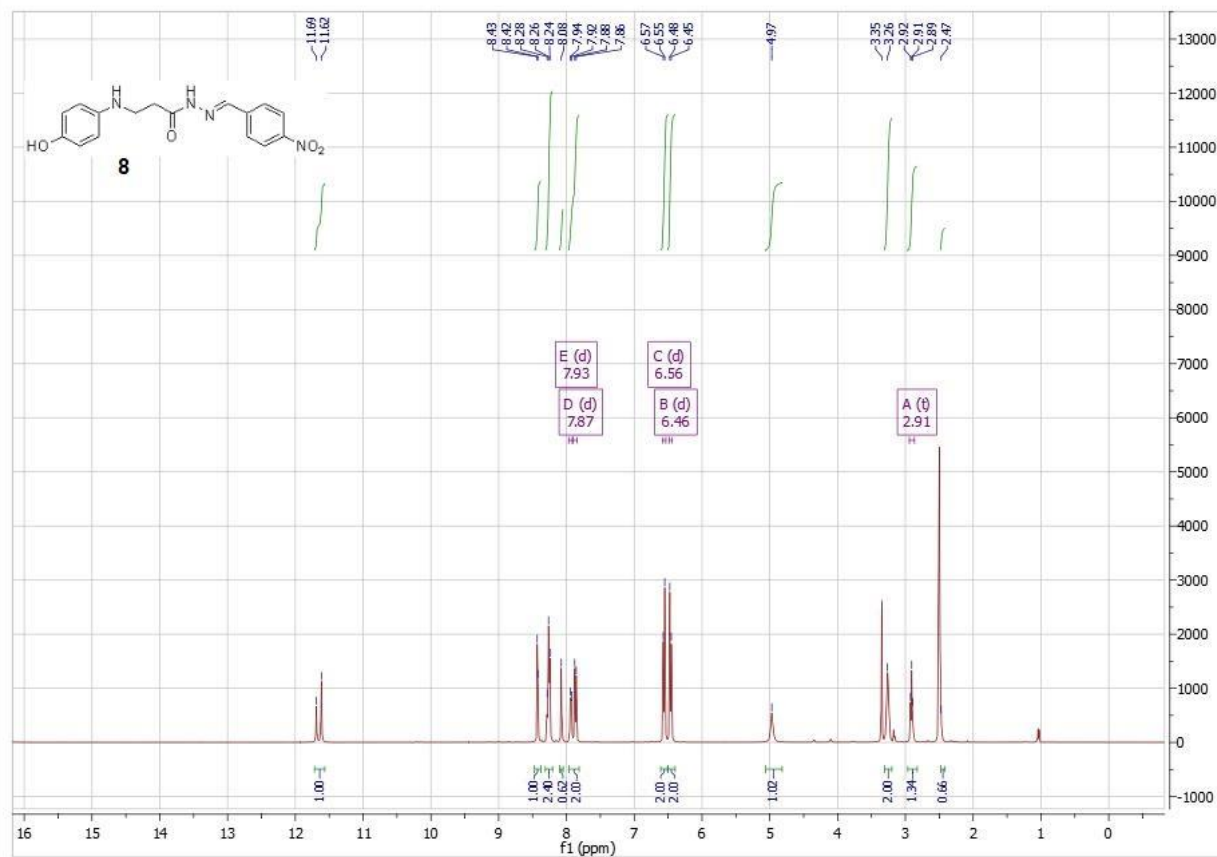

**Figure S7.**  $^1\text{H}$  NMR spectrum of compound **8**

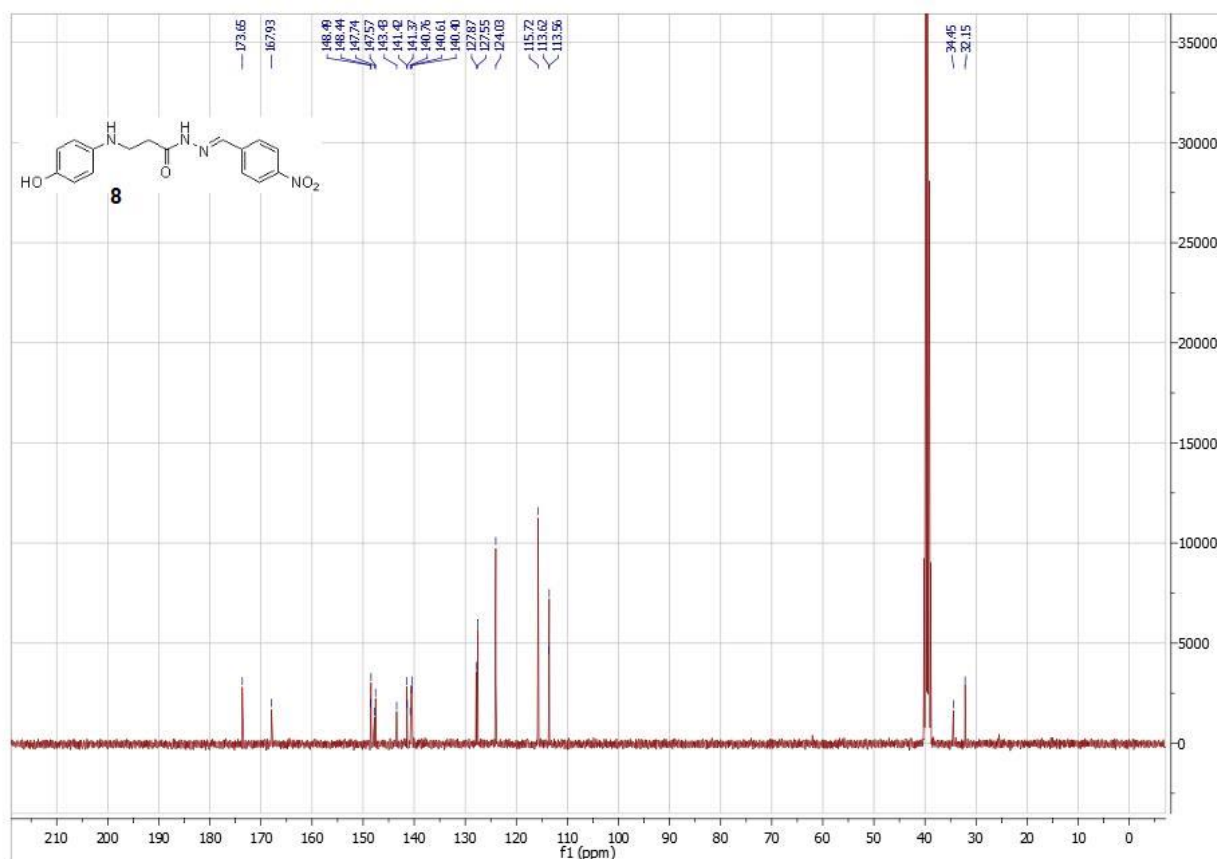

**Figure S8.**  $^{13}\text{C}$  NMR spectrum of compound **8**

*N'*-(4-chlorobenzylidene)-3-((4-hydroxyphenyl)amino)propanehydrazide (**9**)

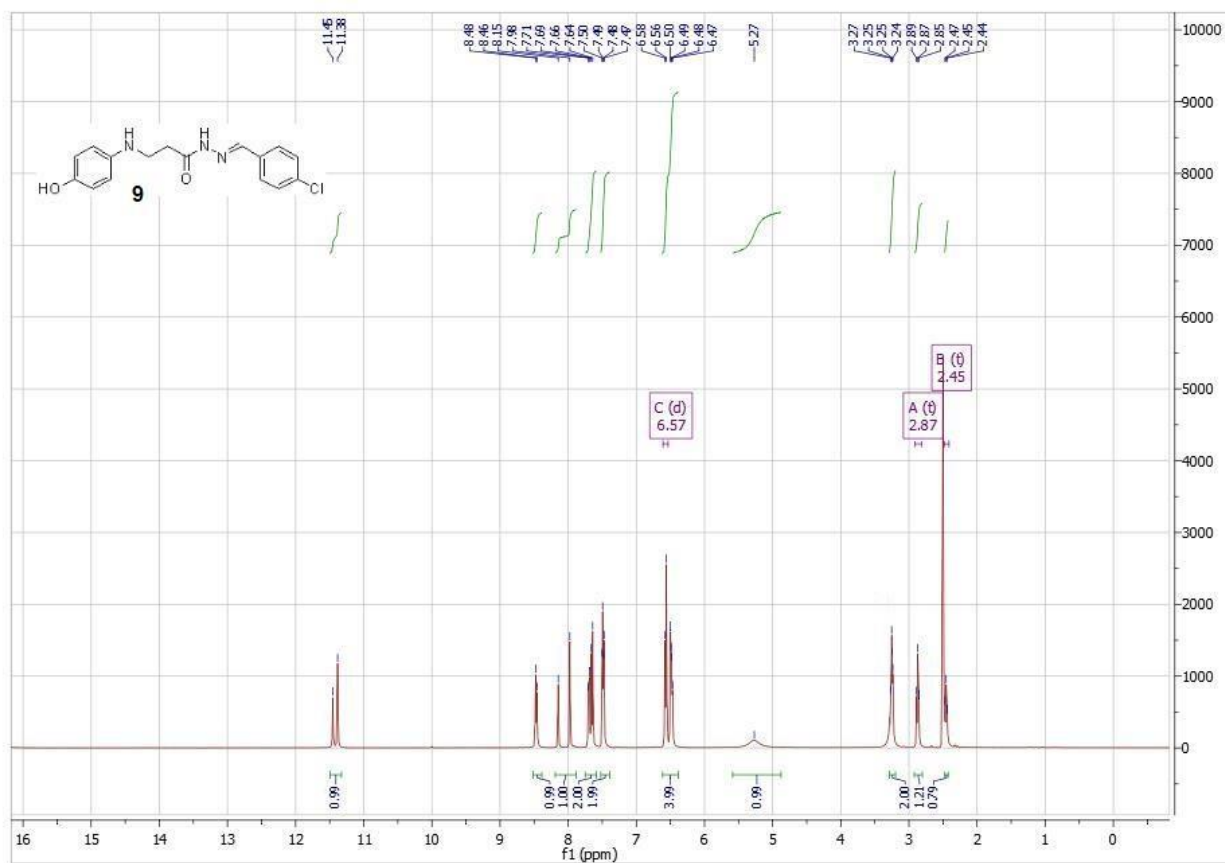

**Figure S9.** <sup>1</sup>H NMR spectrum of compound **9**

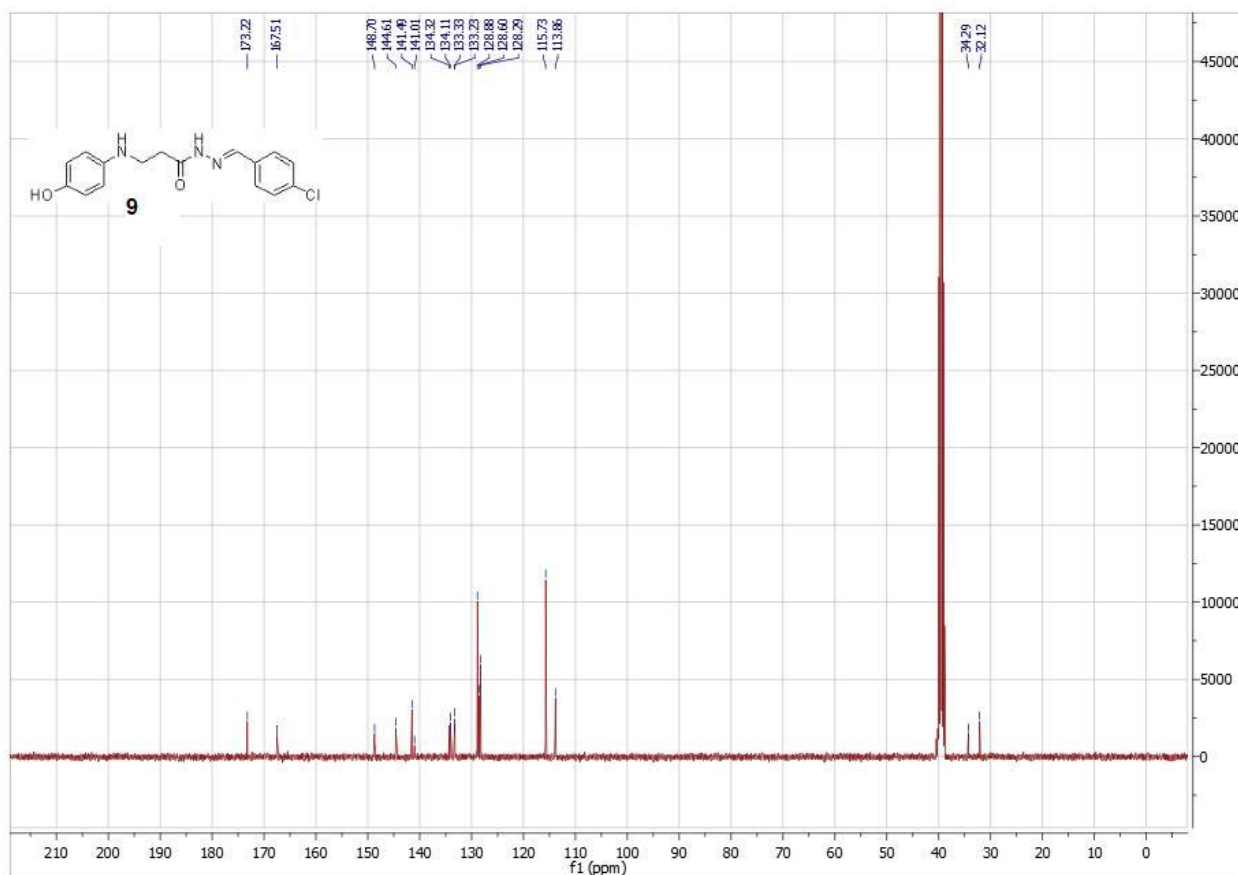

**Figure S10.** <sup>13</sup>C NMR spectrum of compound **9**

*N'*-(4-(dimethylamino)benzylidene)-3-((4-hydroxyphenyl)amino)propanehydrazide (**10**)

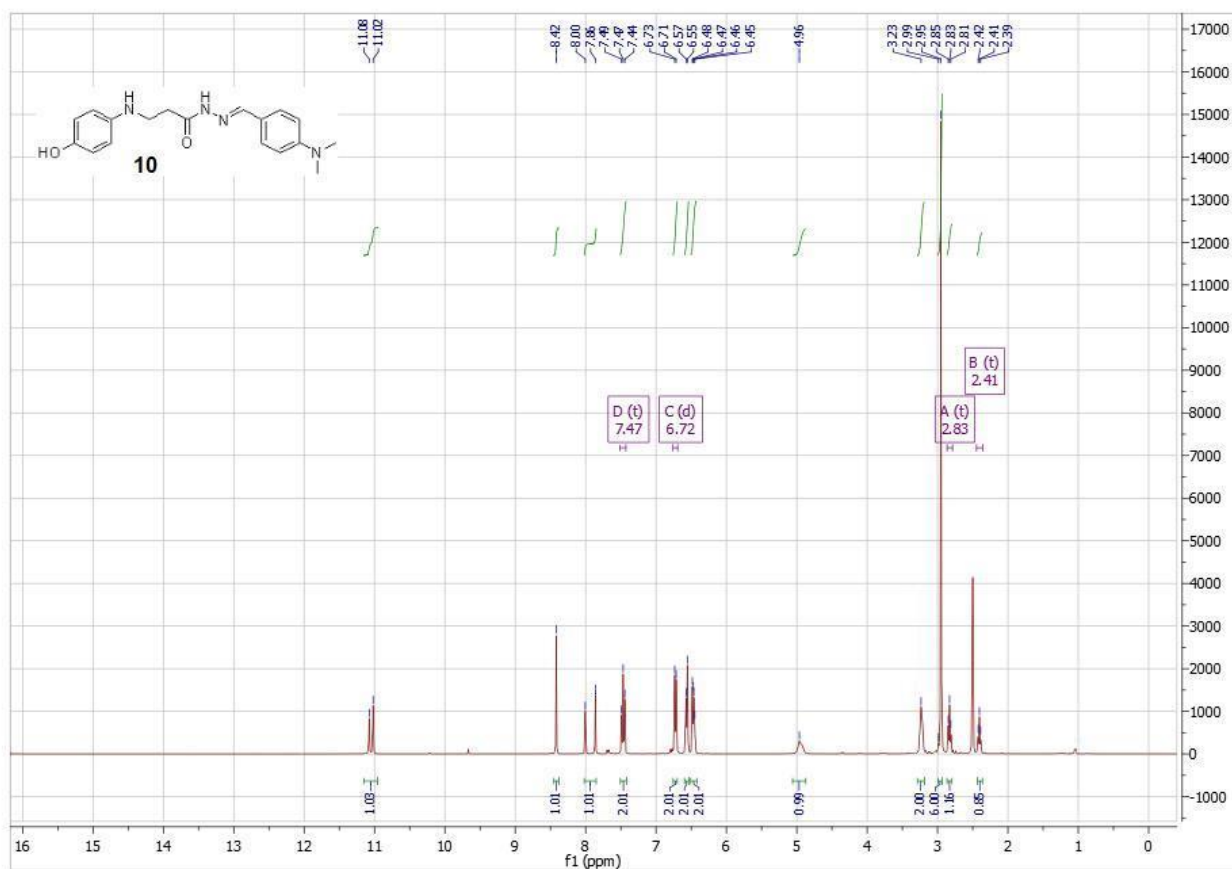

**Figure S11.**  $^1\text{H}$  NMR spectrum of compound **10**

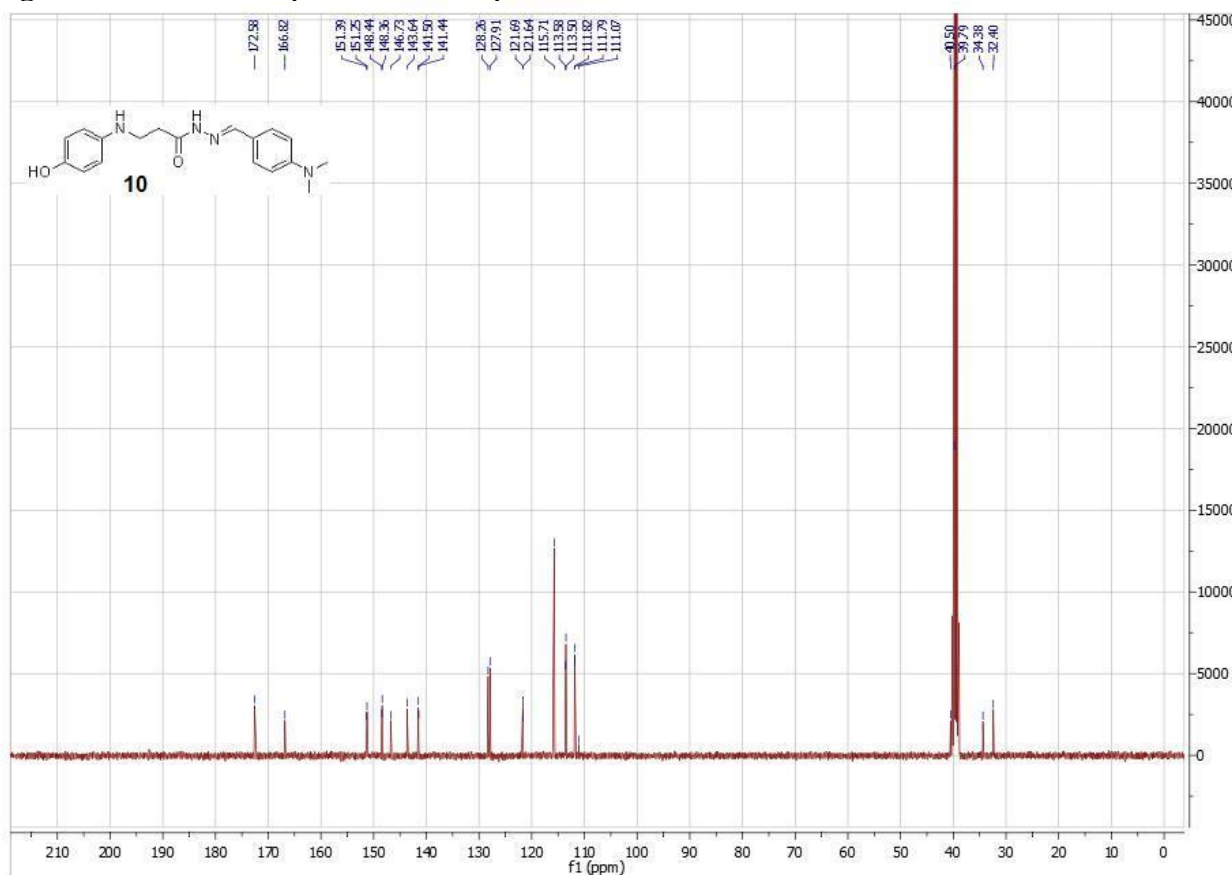

**Figure S12.**  $^{13}\text{C}$  NMR spectrum of compound **10**

*N'*-(4-hydroxybenzylidene)-3-((4-hydroxyphenyl)amino)propanehydrazide (**11**)

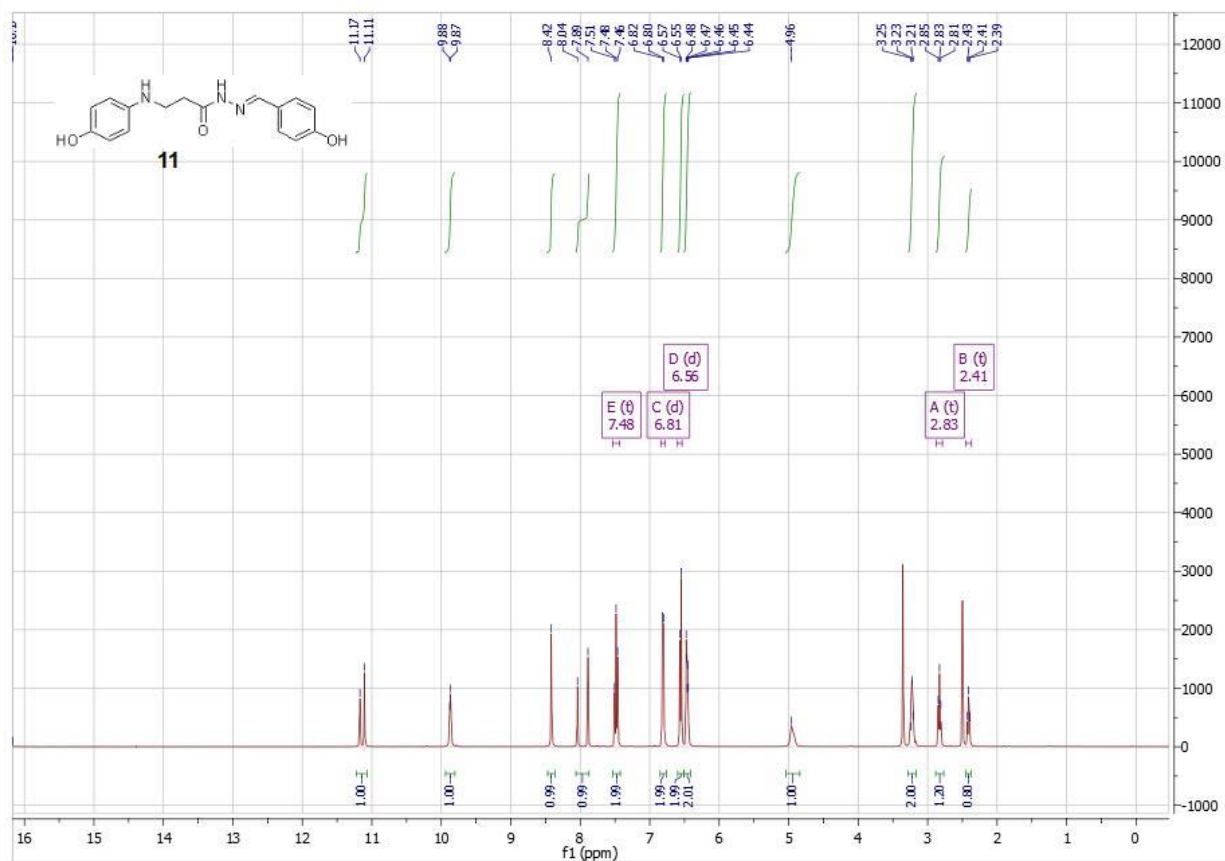

**Figure S13.** <sup>1</sup>H NMR spectrum of compound **11**

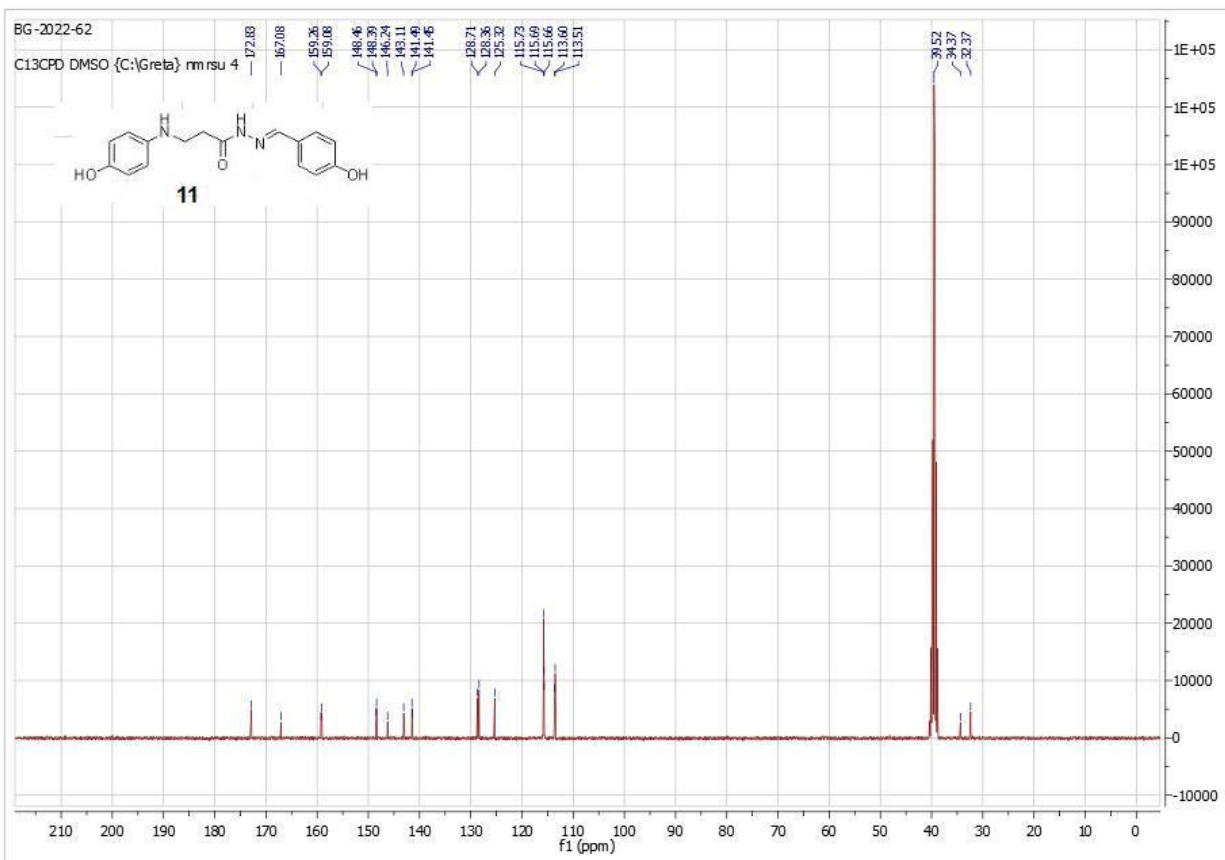

**Figure S14.** <sup>13</sup>C NMR spectrum of compound **11**

*3-((4-Hydroxyphenyl)amino)-N'-(3,4,5-trimethoxybenzylidene)propanehydrazide (12)*



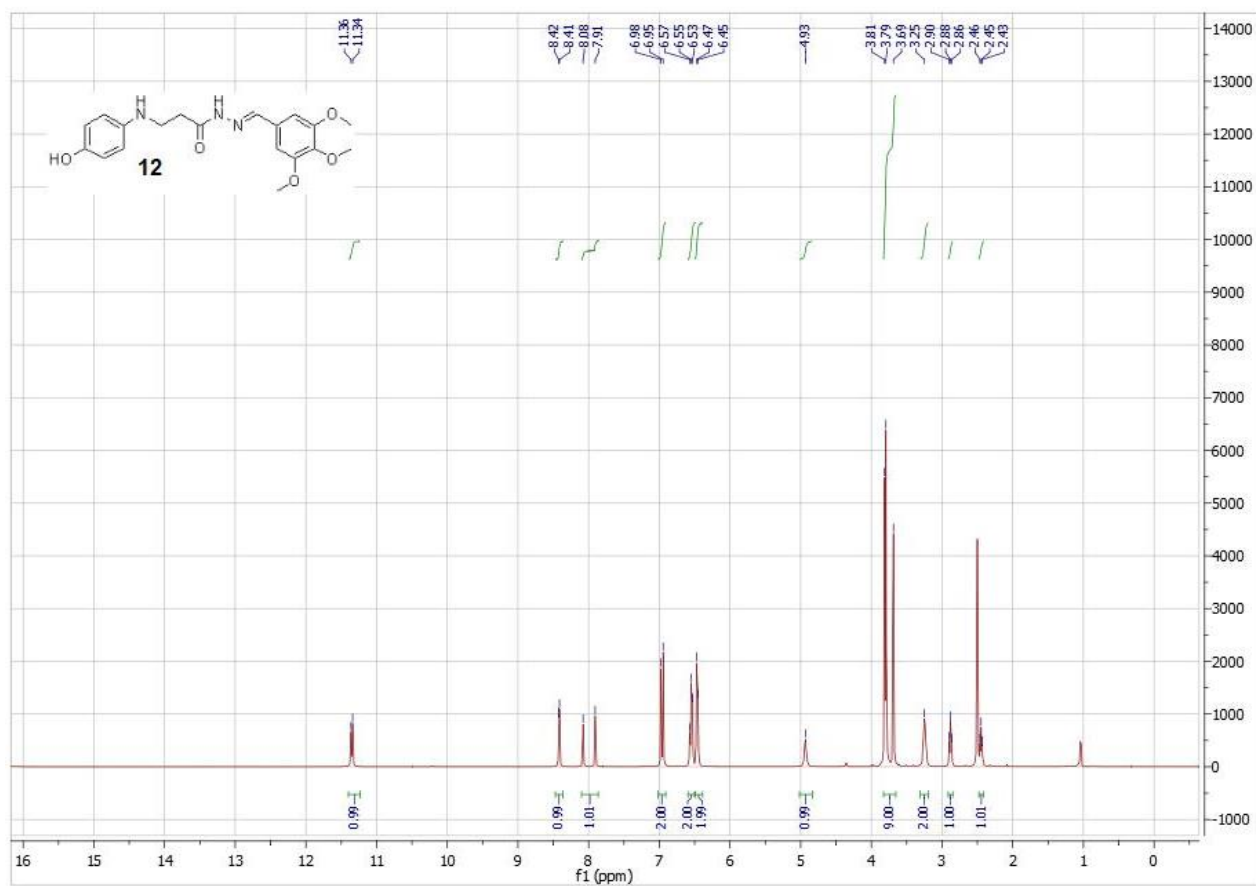

**Figure S15.** <sup>1</sup>H NMR spectrum of compound **12**

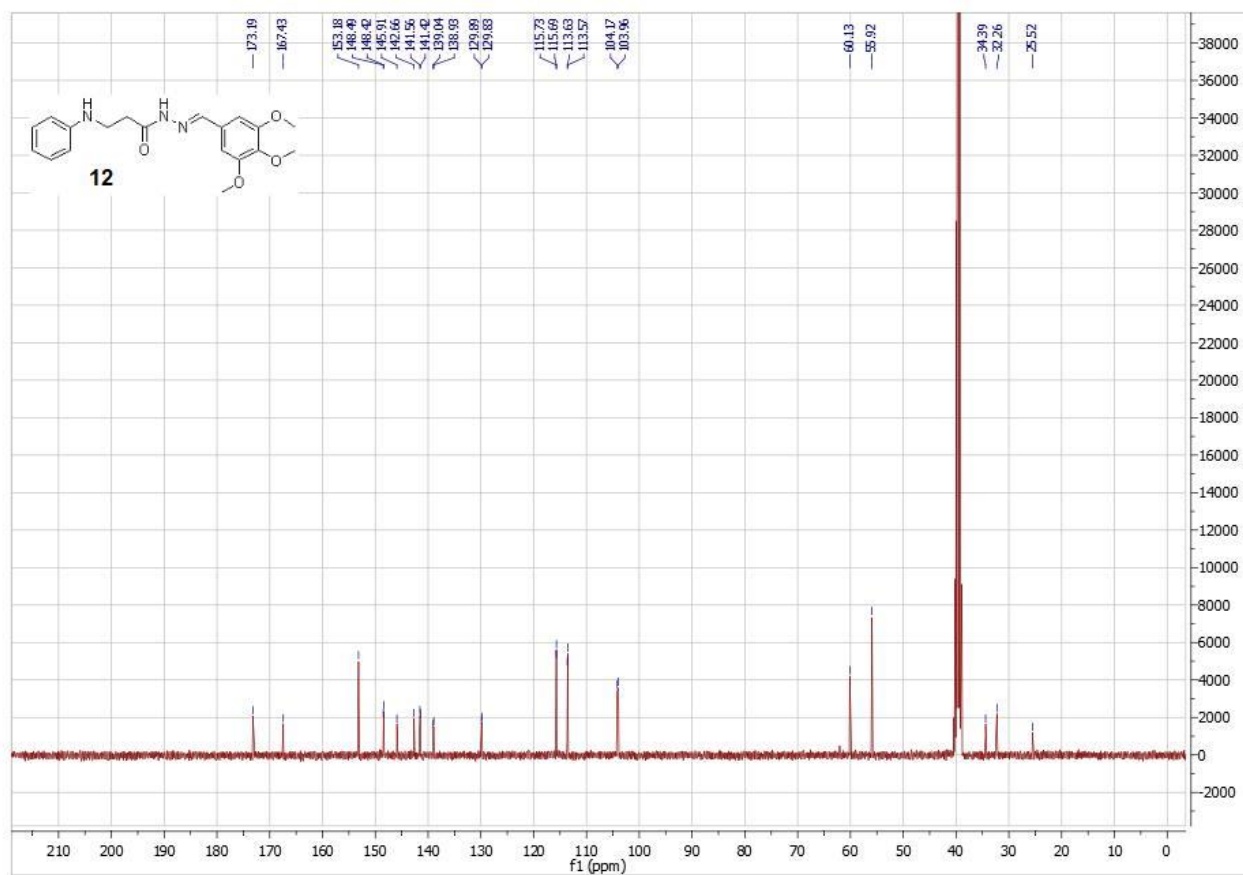

**Figure S16.** <sup>13</sup>C NMR spectrum of compound **12**

3-((4-hydroxyphenyl)amino)-N'-(naphthalen-1-ylmethylene)propanehydrazide (**13**)

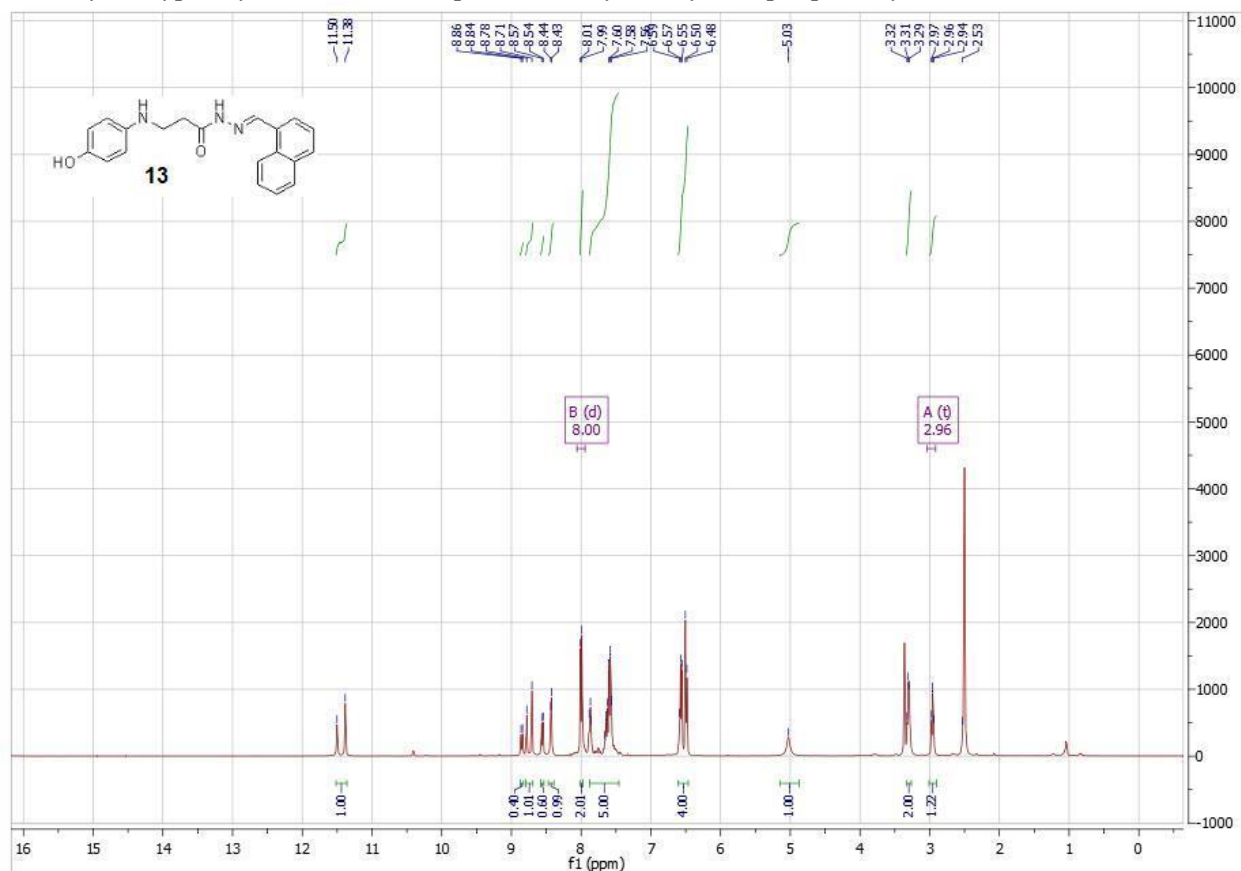

Figure S17. <sup>1</sup>H NMR spectrum of compound **13**

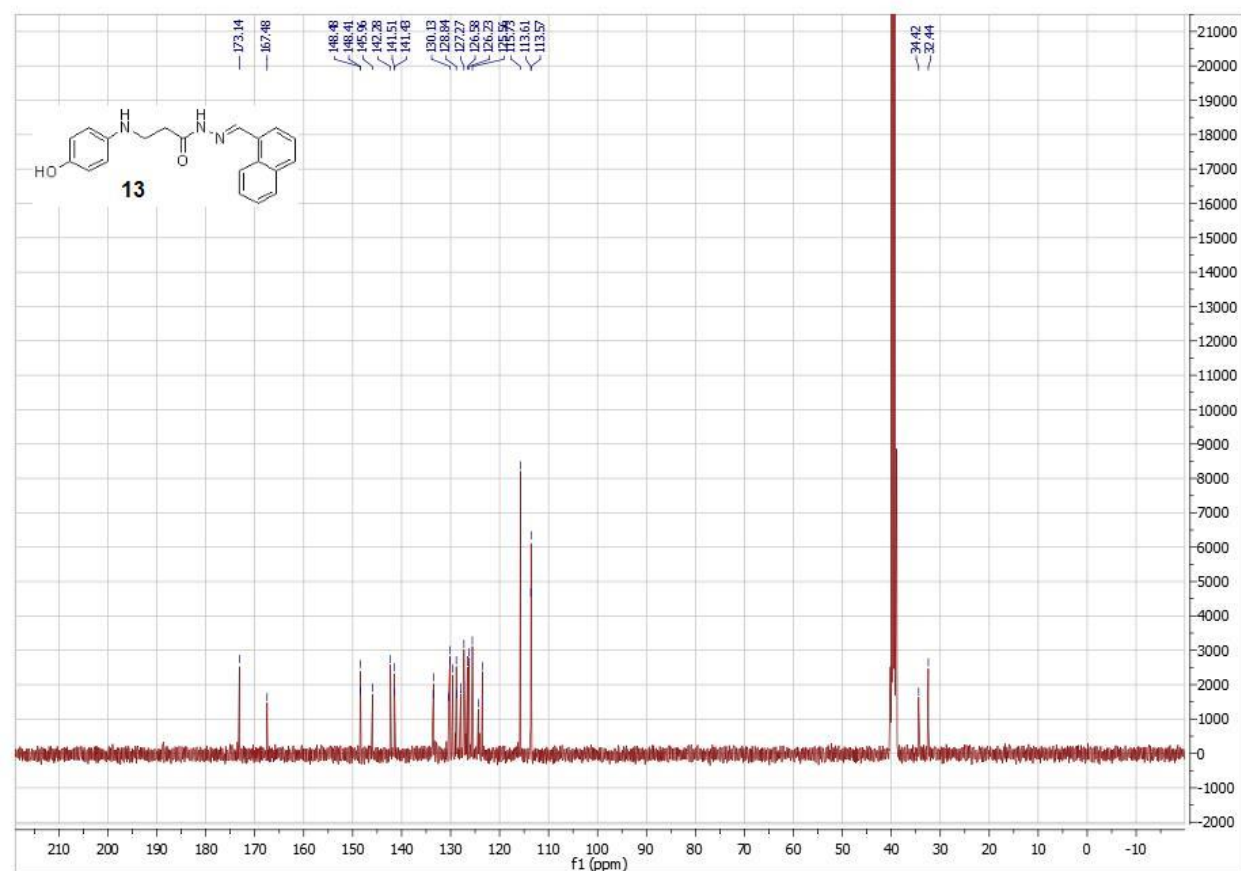

Figure S18. <sup>13</sup>C NMR spectrum of compound **13**

*3-((4-Hydroxyphenyl)amino)-N'-(thien-2-ylmethylene)propanehydrazide (14)*

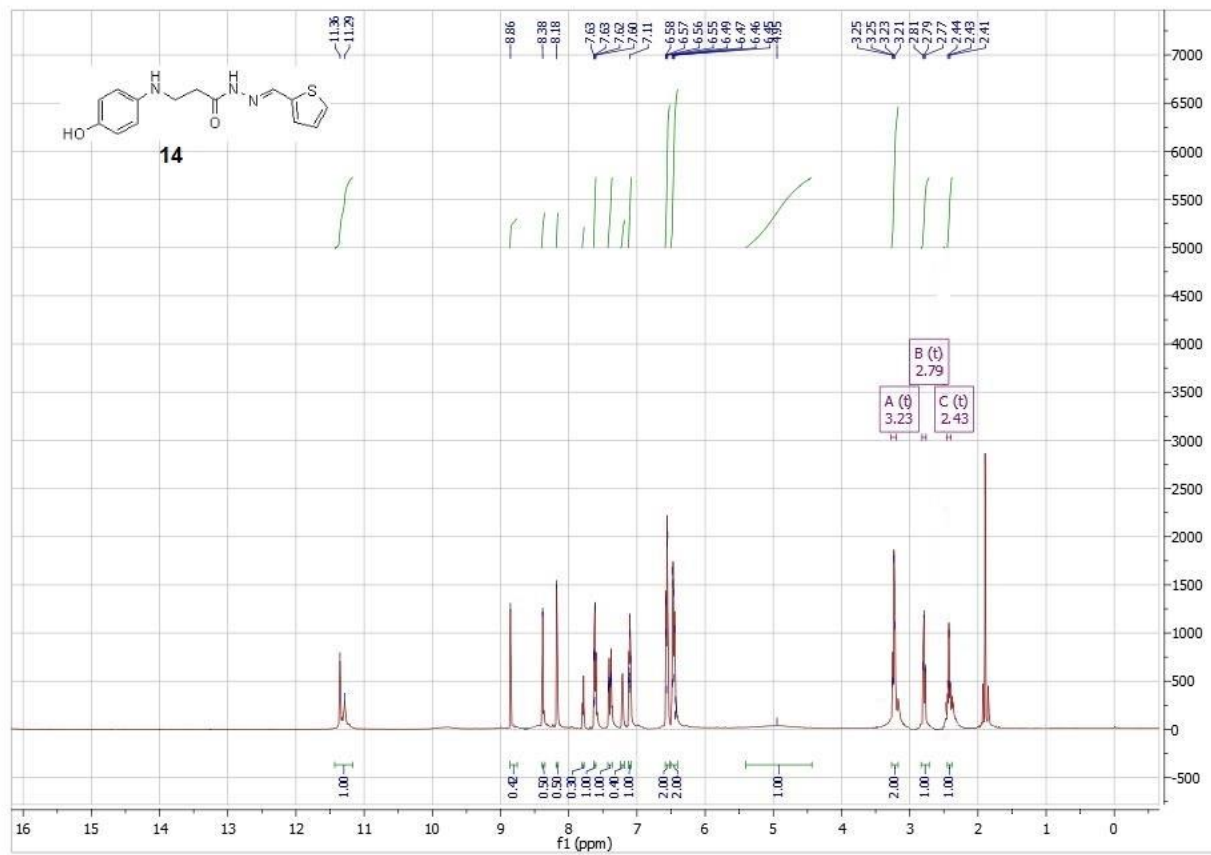

**Figure S19.**  $^1\text{H}$  NMR spectrum of compound **14**

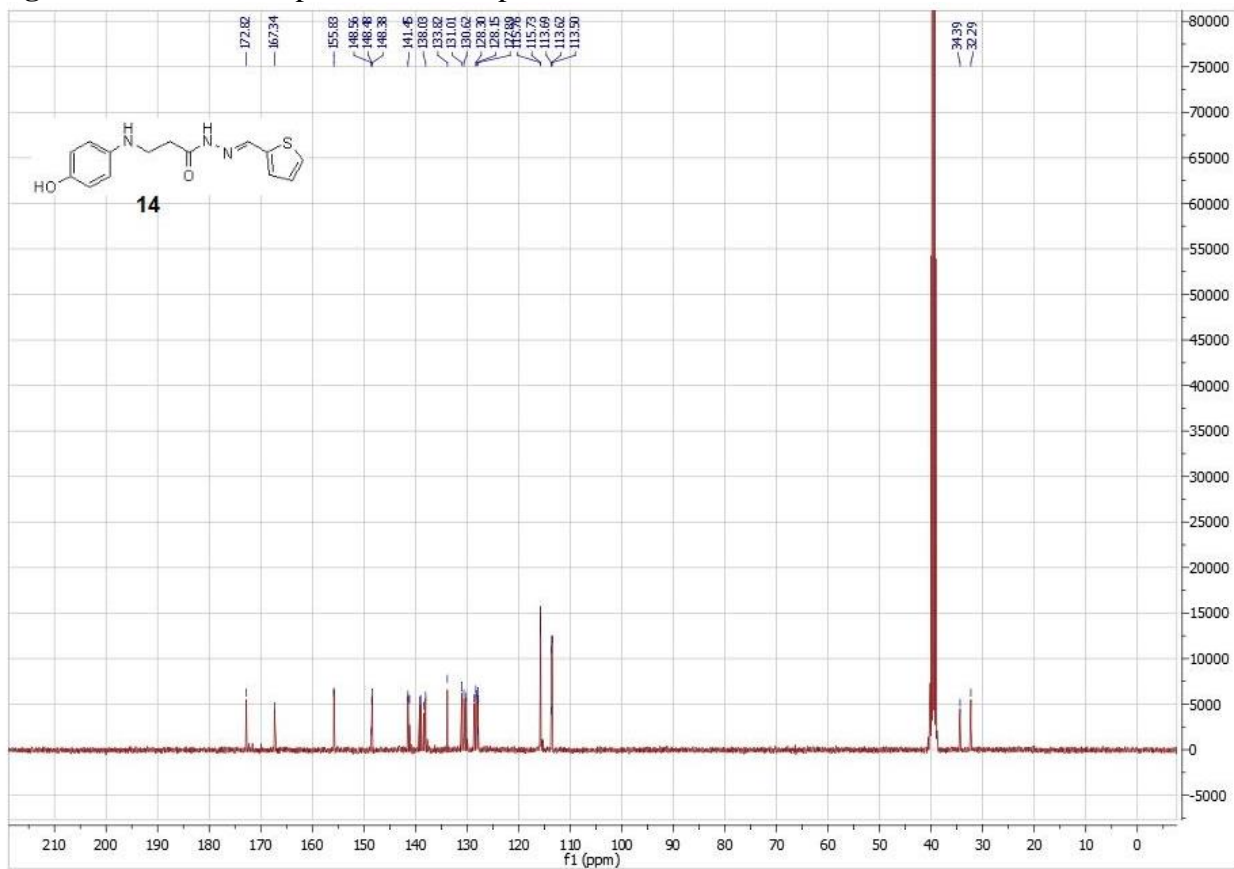

**Figure S20.**  $^{13}\text{C}$  NMR spectrum of compound **14**

3-((4-Hydroxyphenyl)amino)-N'-((5-nitrothien-2-yl)methylene)propanehydrazide (**15**)

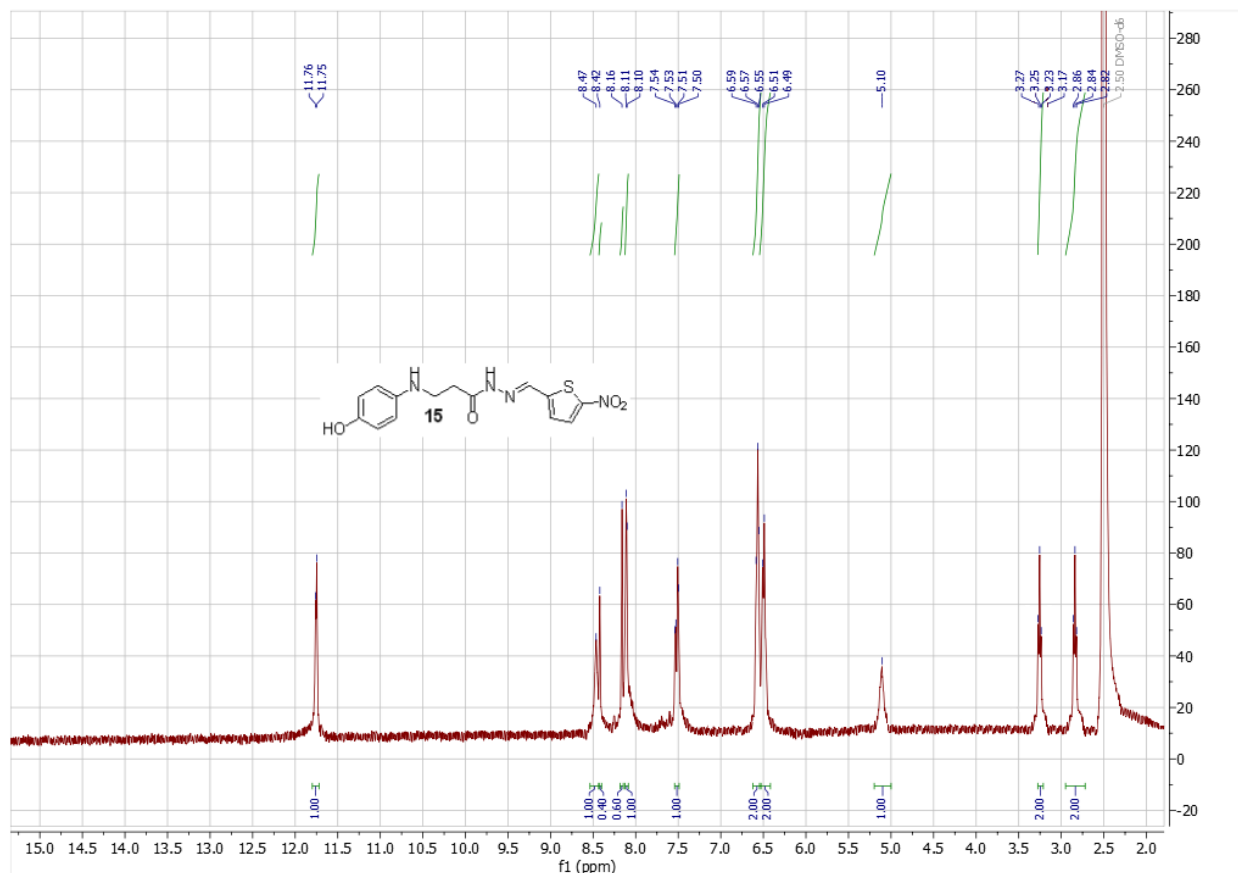

Figure S21. <sup>1</sup>H NMR spectrum of compound **15**

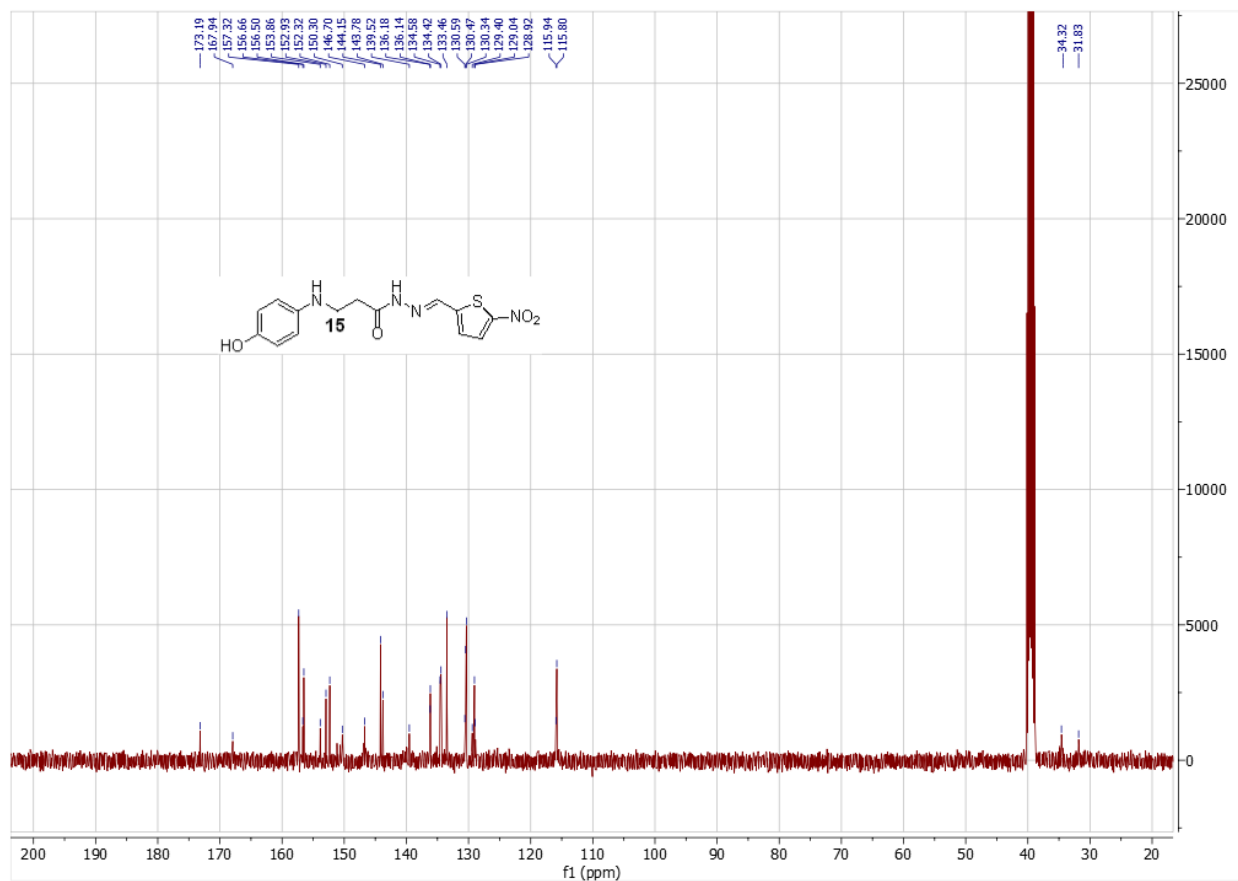

Figure S22. <sup>13</sup>C NMR spectrum of compound **15**

3-((4-Hydroxyphenyl)amino)-N'-((5-nitrofuryl-2-yl)methylene)propanehydrazide (**16**)

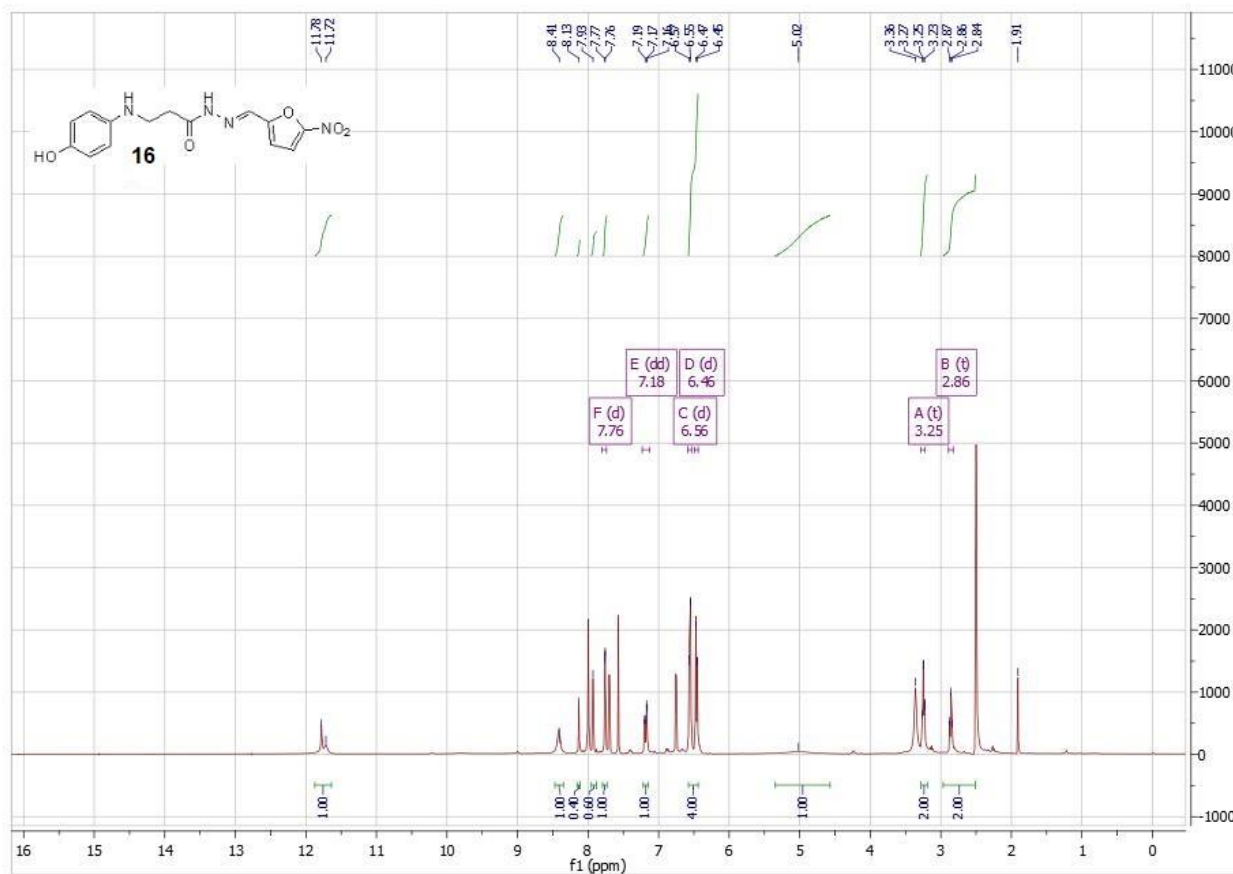

Figure S23. <sup>1</sup>H NMR spectrum of compound **16**

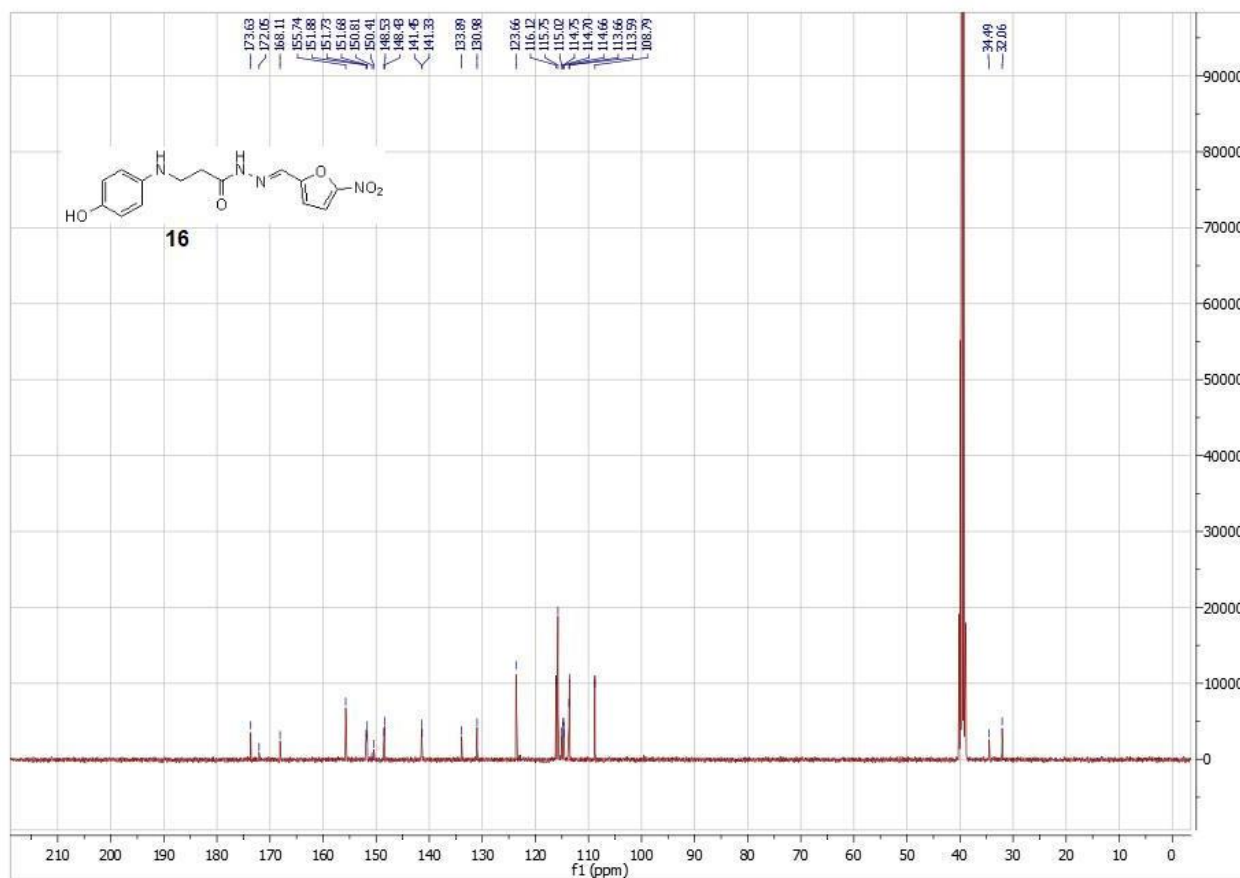

Figure S24. <sup>13</sup>C NMR spectrum of compound **16**

*N*-(2,5-dimethyl-1*H*-pyrrol-1-yl)-3-((4-hydroxyphenyl)amino)propanamide (**17**)

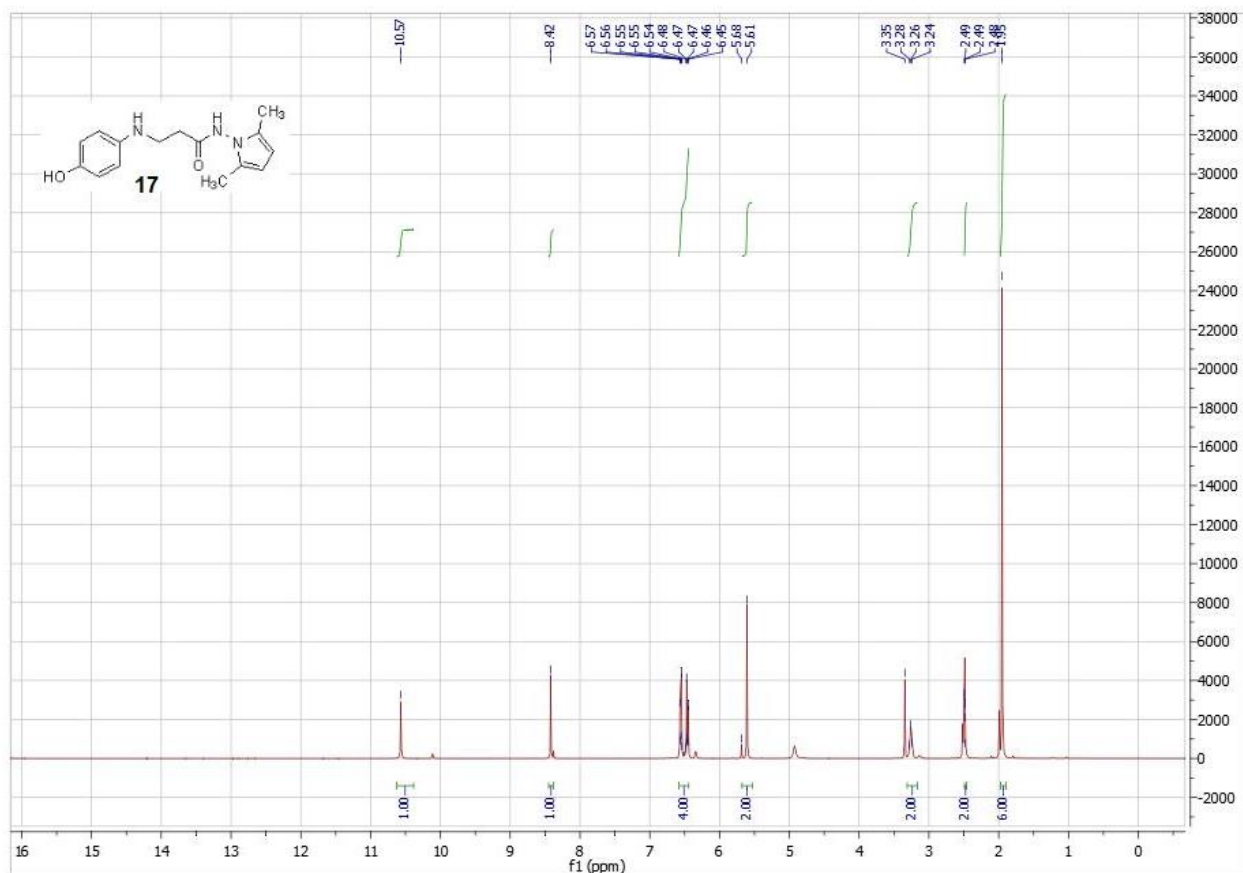

**Figure S25.** <sup>1</sup>H NMR spectrum of compound **17**

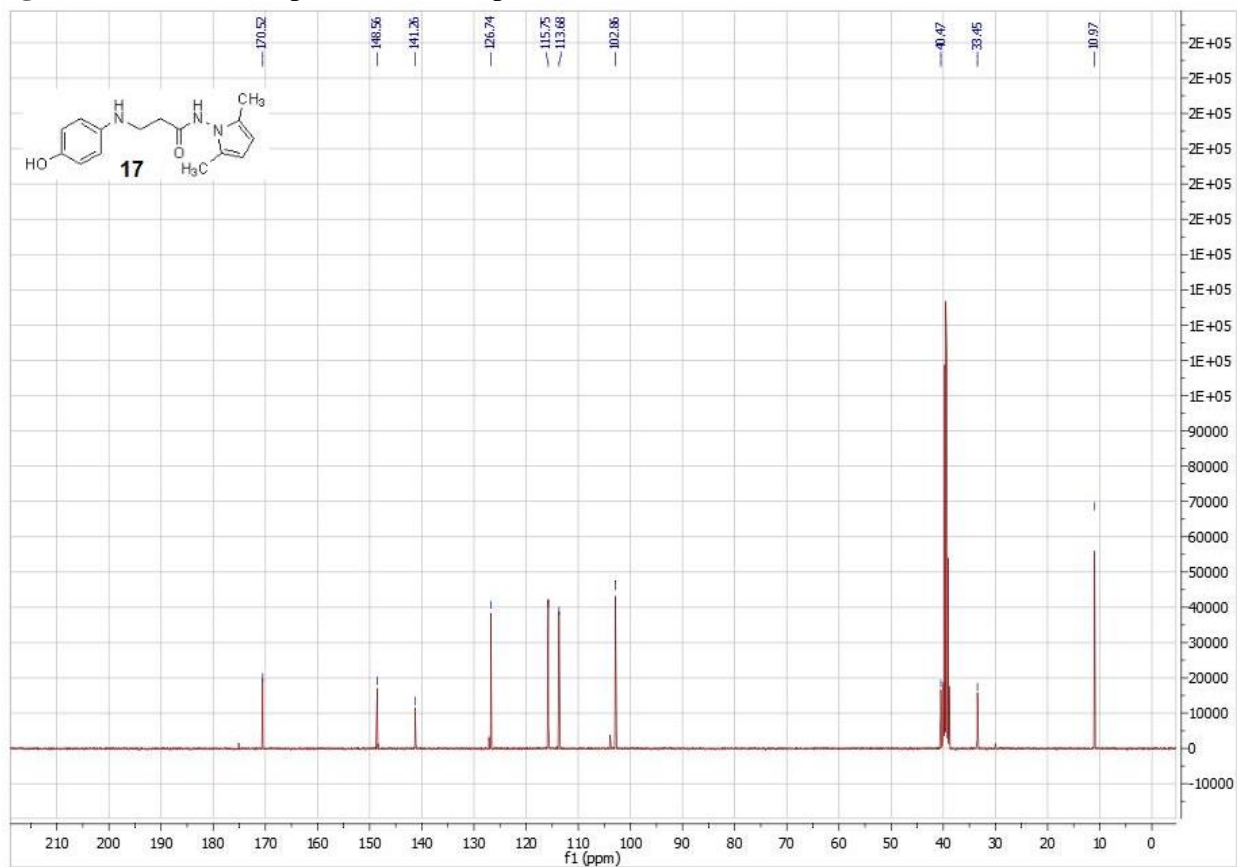

**Figure S26.** <sup>13</sup>C NMR spectrum of compound **17**



3-((4-Hydroxyphenyl)amino)-N'-(2-oxoindolin-3-ylidene)propanehydrazide (**18**)

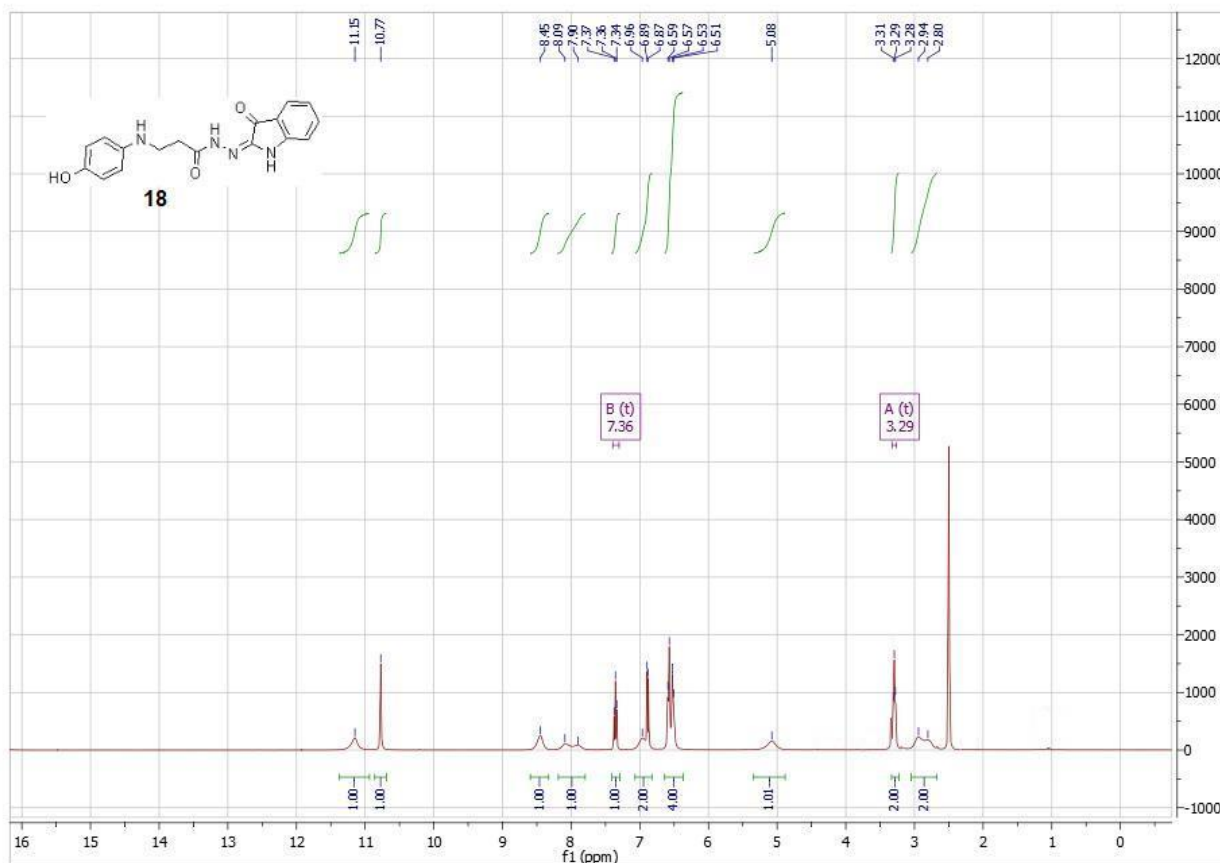

Figure S27. <sup>1</sup>H NMR spectrum of compound **18**

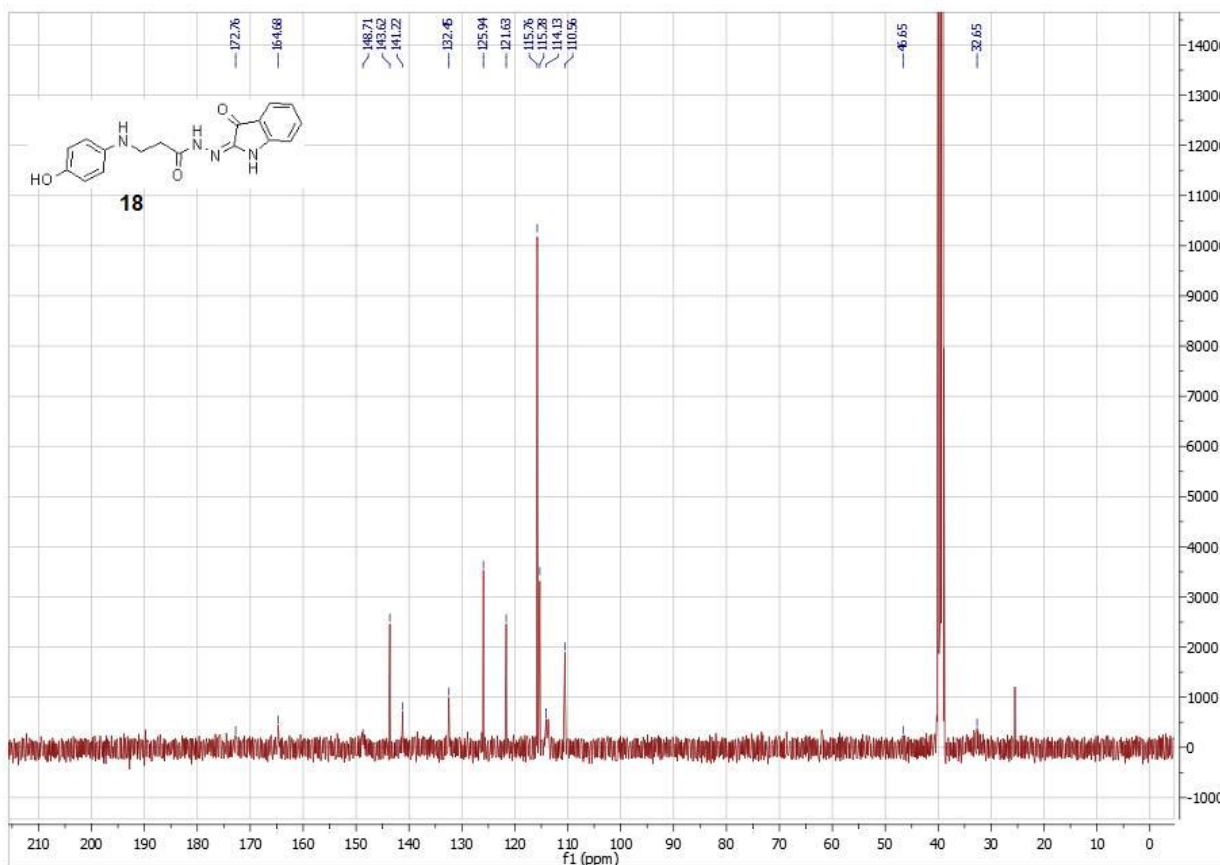

Figure S28. <sup>13</sup>C NMR spectrum of compound **18**

3,3'-((4-Hydroxyphenyl)azanediyl)bis(*N'*-(2-oxindolin-3-yl)methylene)propanehydrazide (**19**)

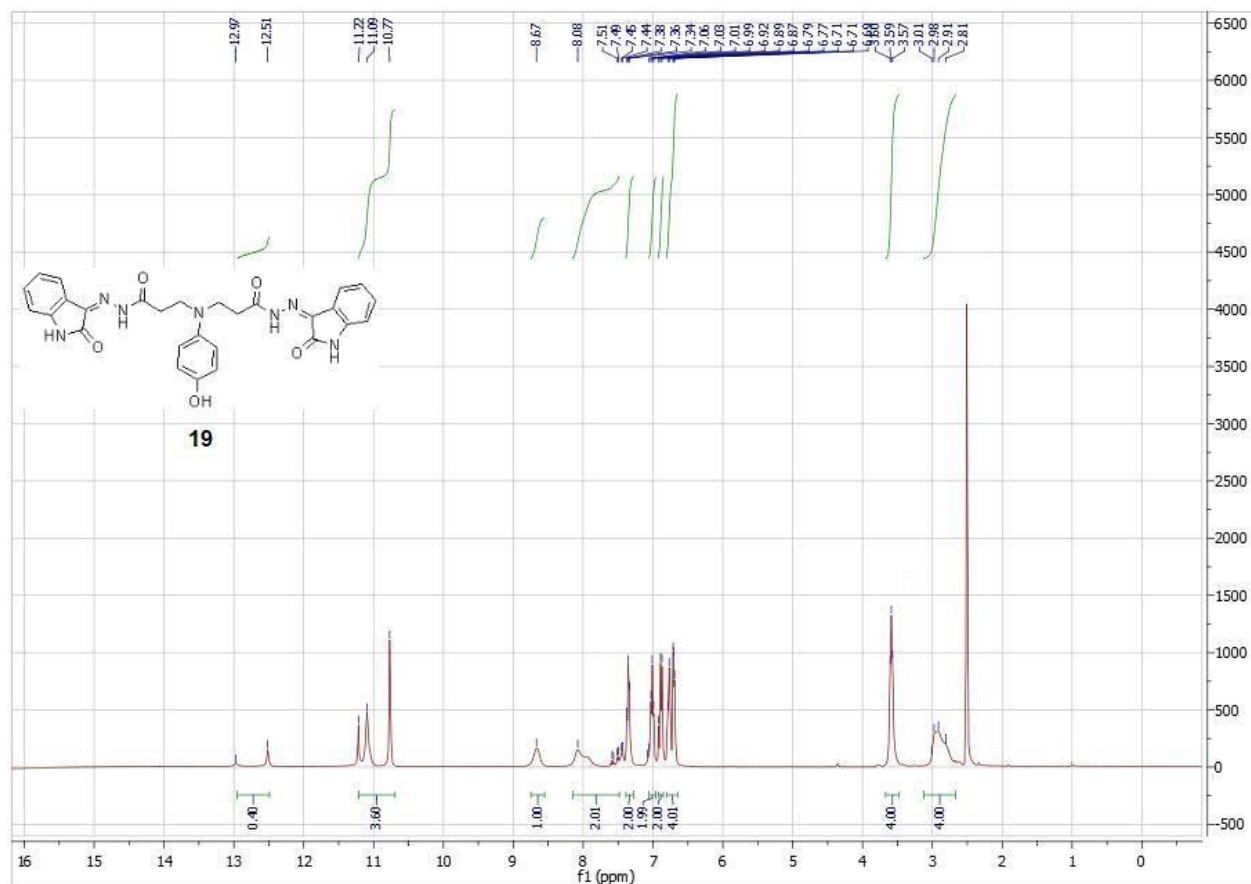

Figure S29. <sup>1</sup>H NMR spectrum of compound **19**

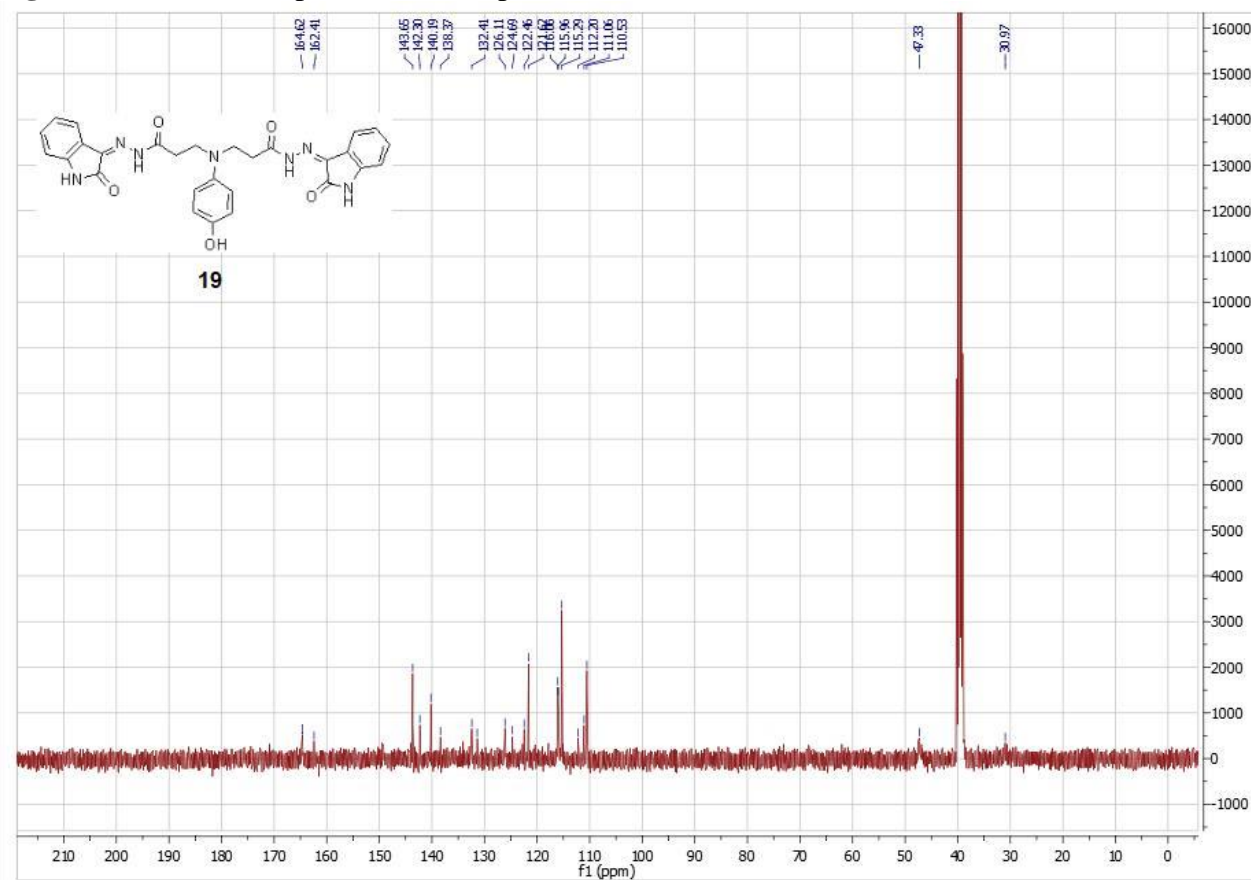

Figure S30. <sup>13</sup>C NMR spectrum of compound **19**



5,5'-(((4-Hydroxyphenyl)azanediyl)bis(ethane-2,1-diyl))bis(1,3,4-oxadiazole-2(3H)-thione) (**20**)

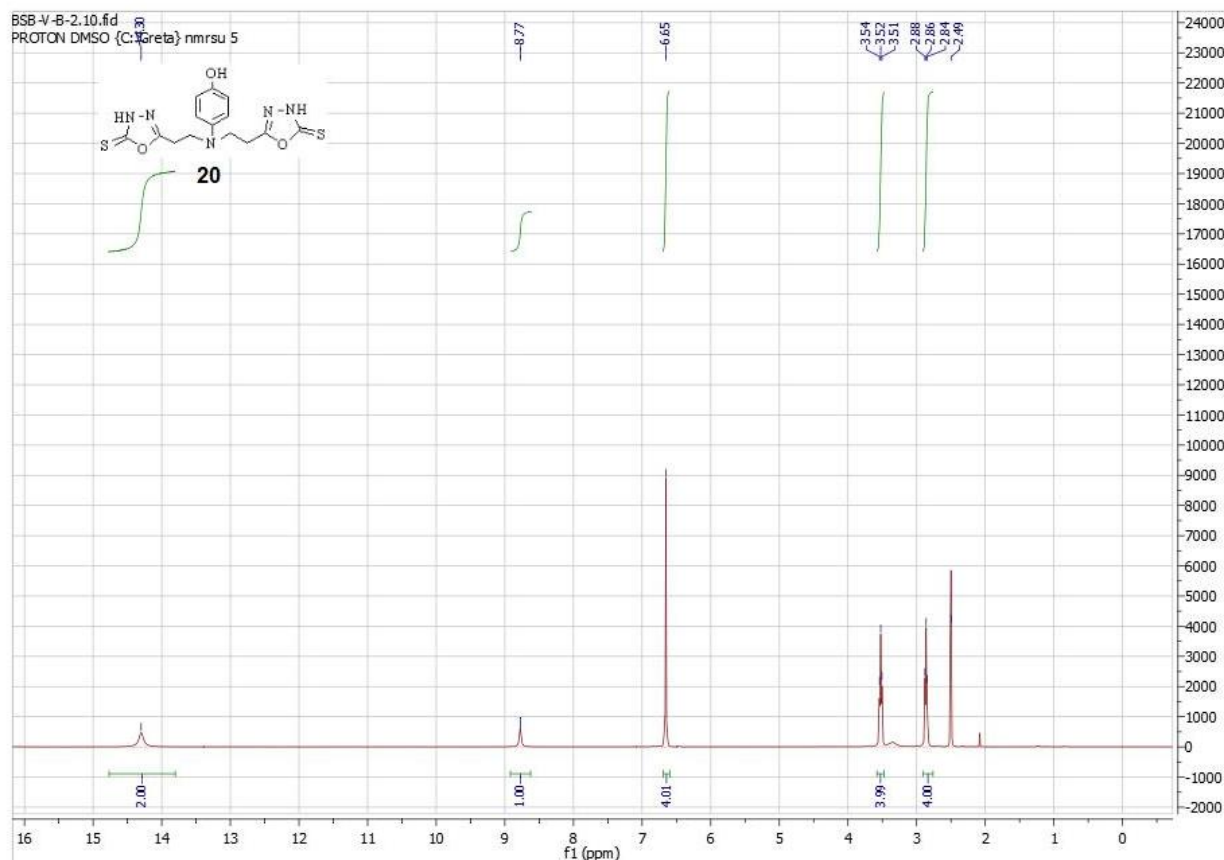

**Figure S31.**  $^1\text{H}$  NMR spectrum of compound **20**

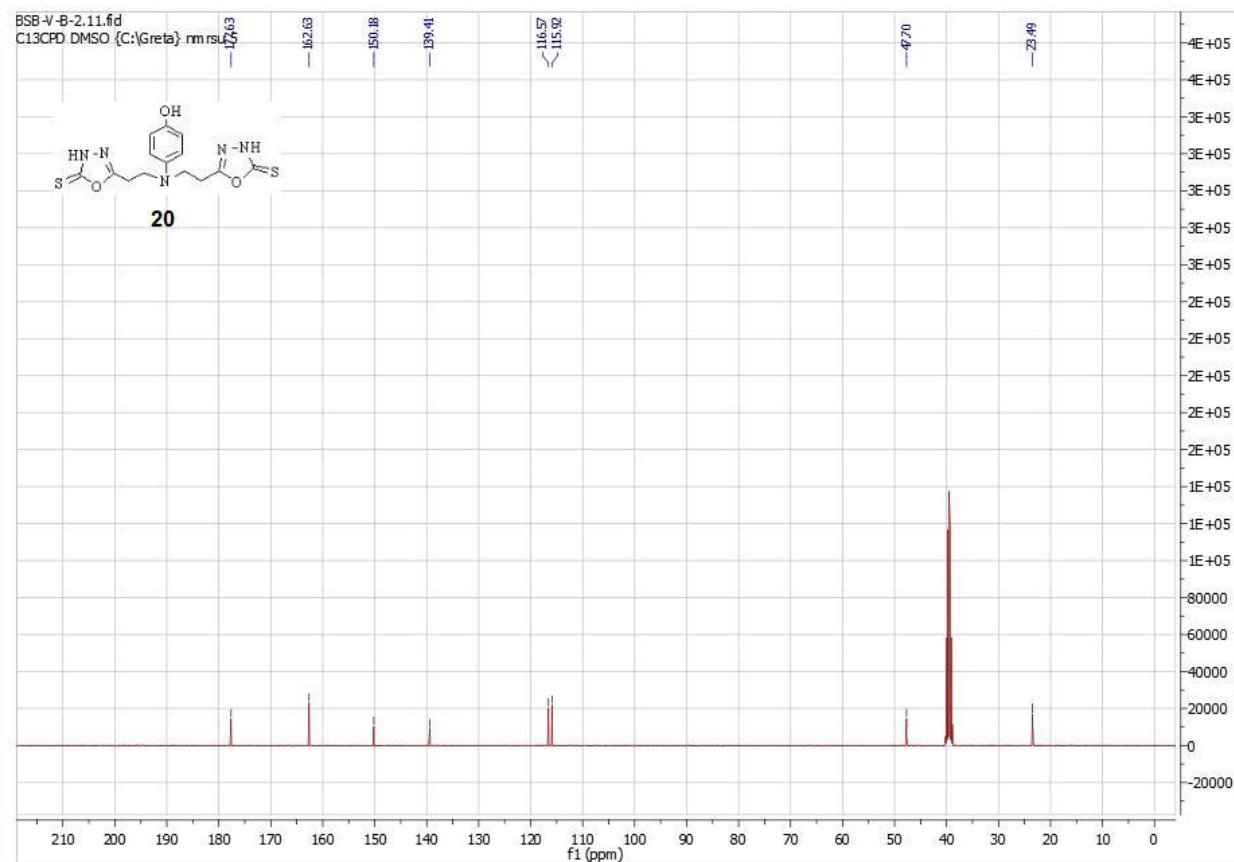

**Figure S32.**  $^{13}\text{C}$  NMR spectrum of compound **20**

3,3'-((4-Hydroxyphenyl)azanediyl)bis(*N'*-(furan-2-ylmethylene)propanehydrazide) (**21**)

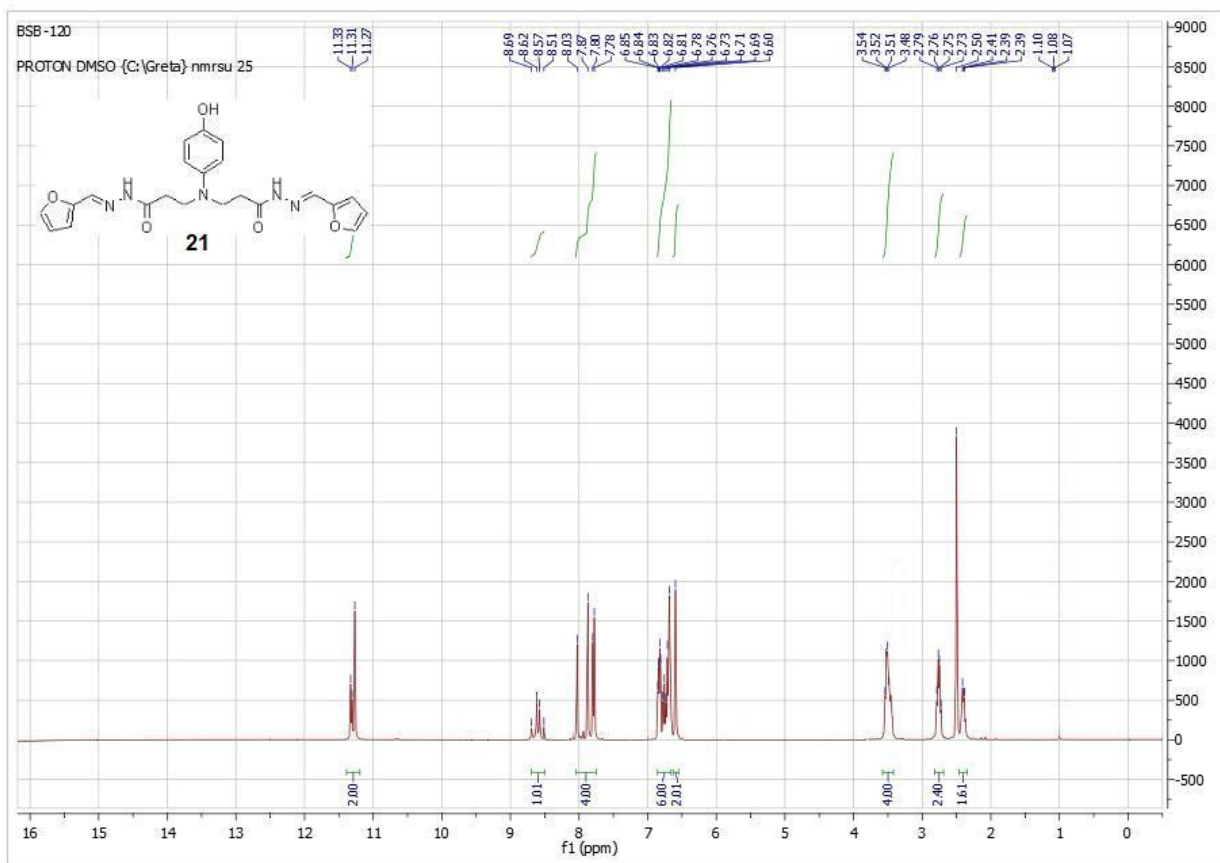

Figure S33.  $^1\text{H}$  NMR spectrum of compound **21**

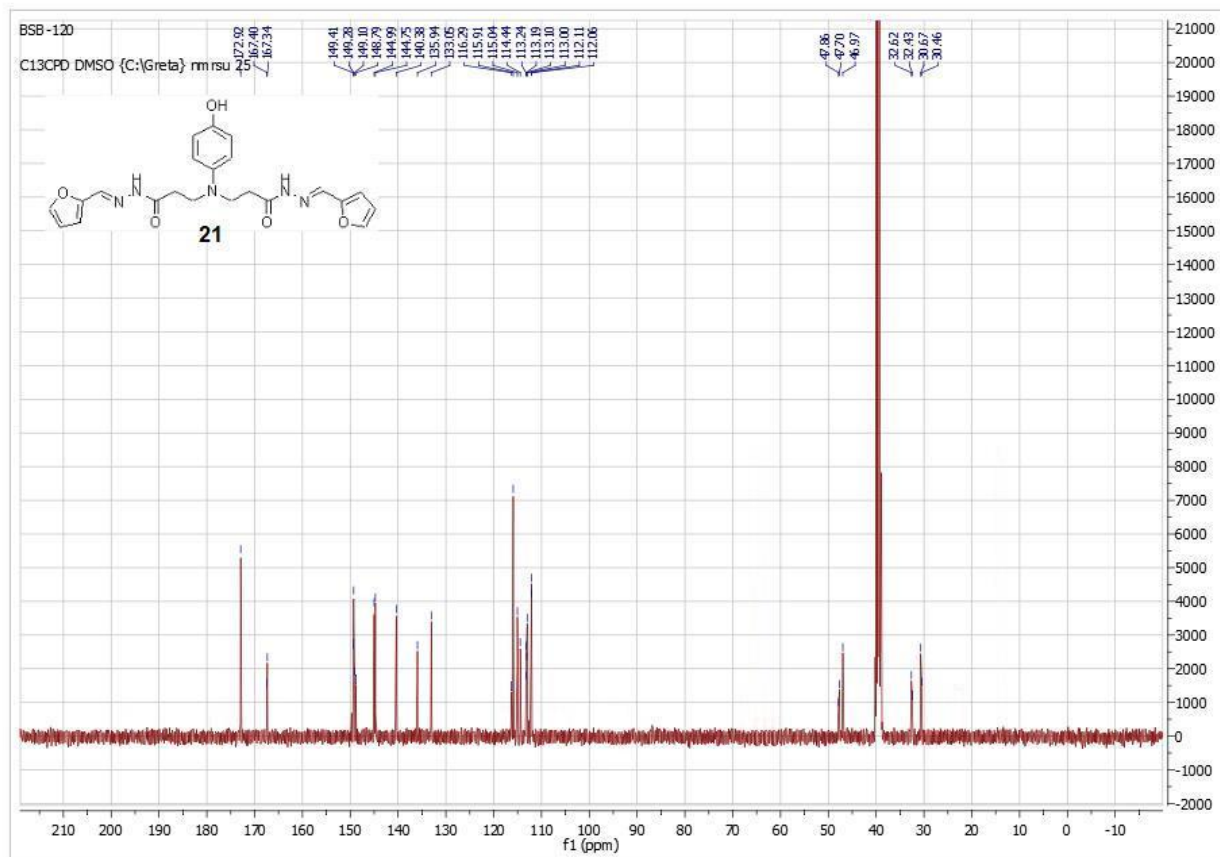

Figure S34.  $^{13}\text{C}$  NMR spectrum of compound **21**

3,3'-((4-Hydroxyphenyl)azanediyl)bis(*N*'-(thien-2-ylmethylene)propanehydrazide) (**22**)

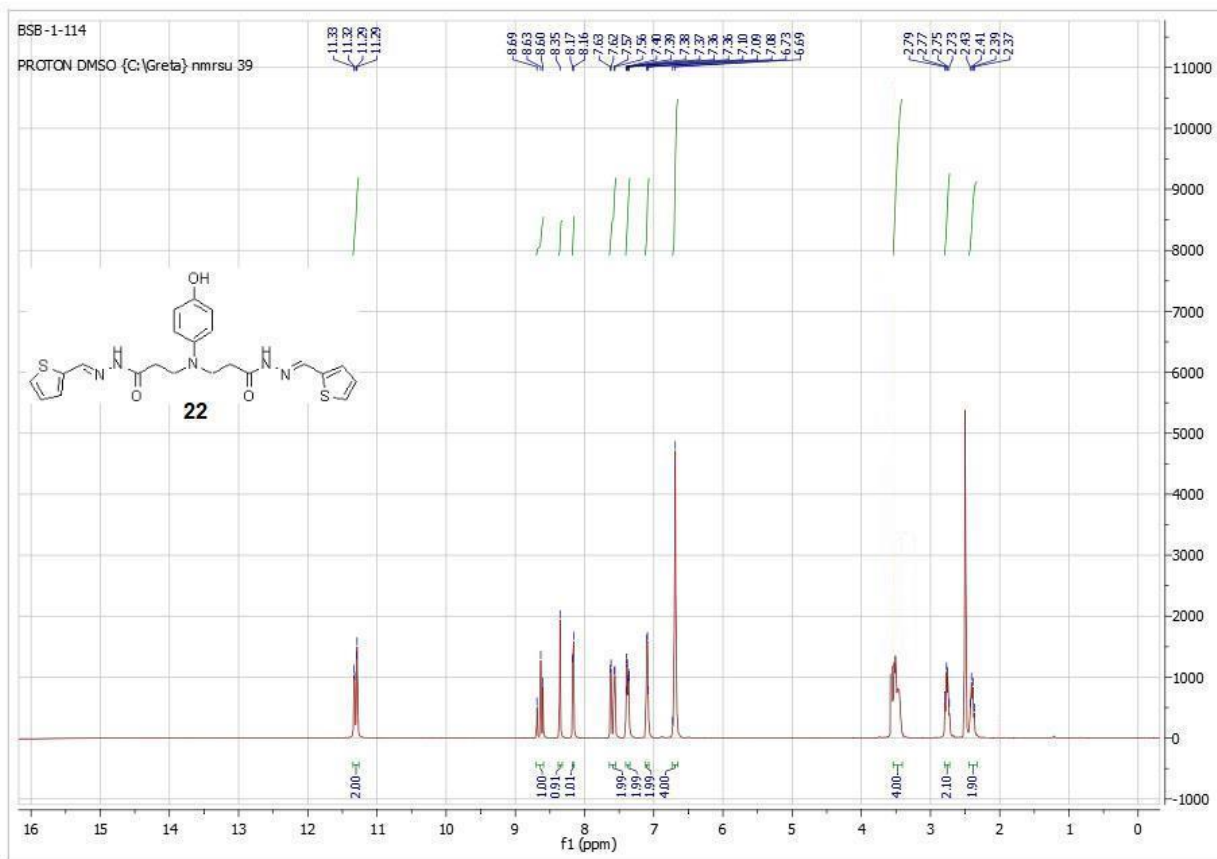

Figure S35.  $^1\text{H}$  NMR spectrum of compound **22**

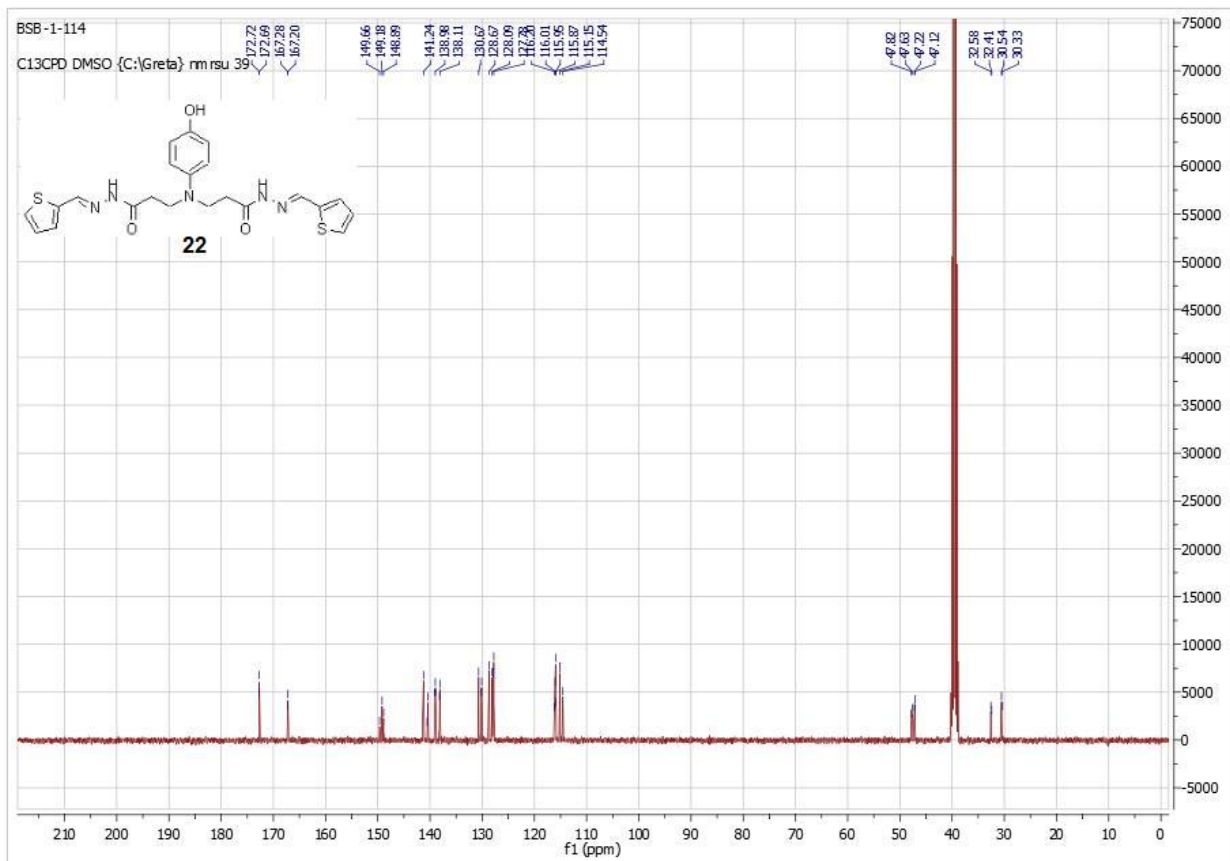

Figure S36.  $^{13}\text{C}$  NMR spectrum of compound **22**

3,3'-((4-Hydroxyphenyl)azanediyl)bis(N'-(-(5-nitrothien-2-yl)methylene)propanehydrazide) (**23**)

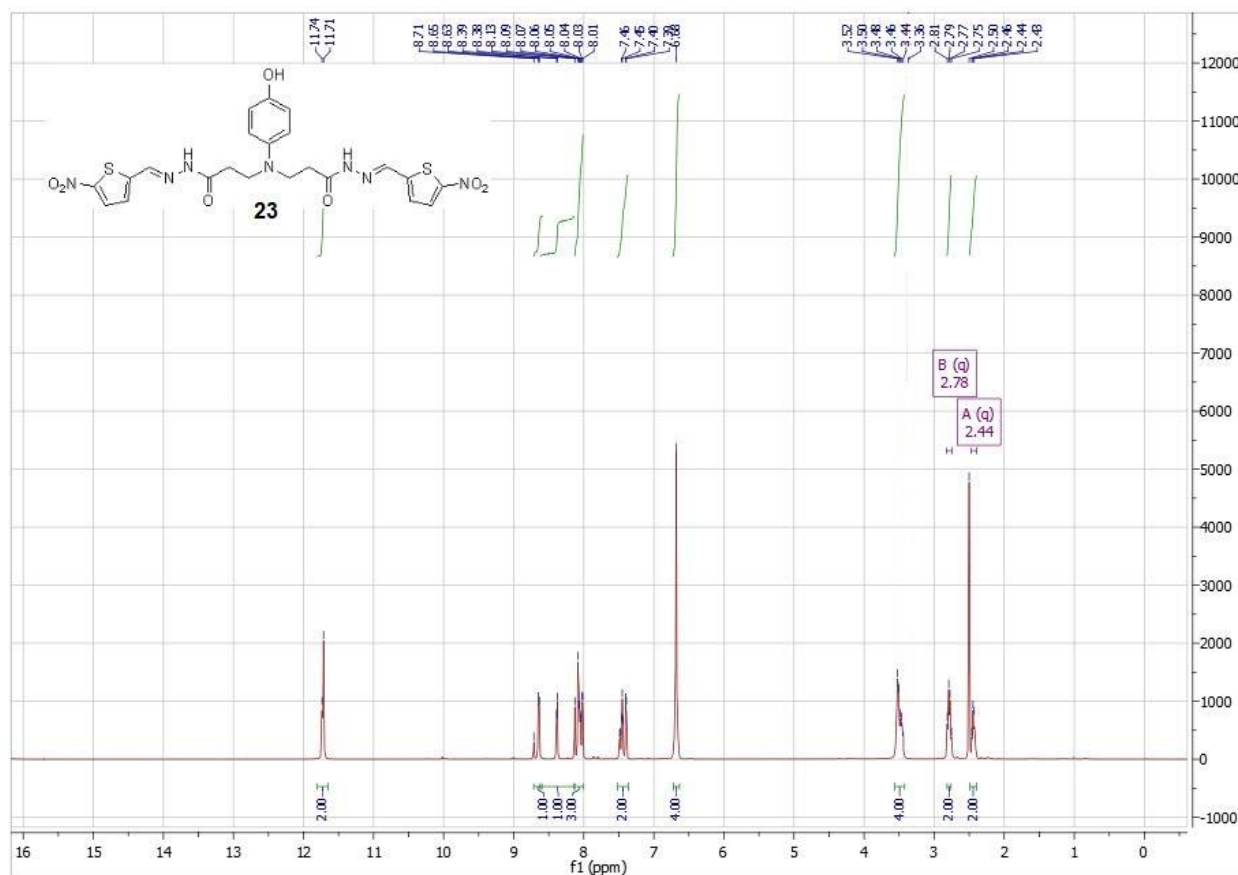

Figure S37. <sup>1</sup>H NMR spectrum of compound **23**

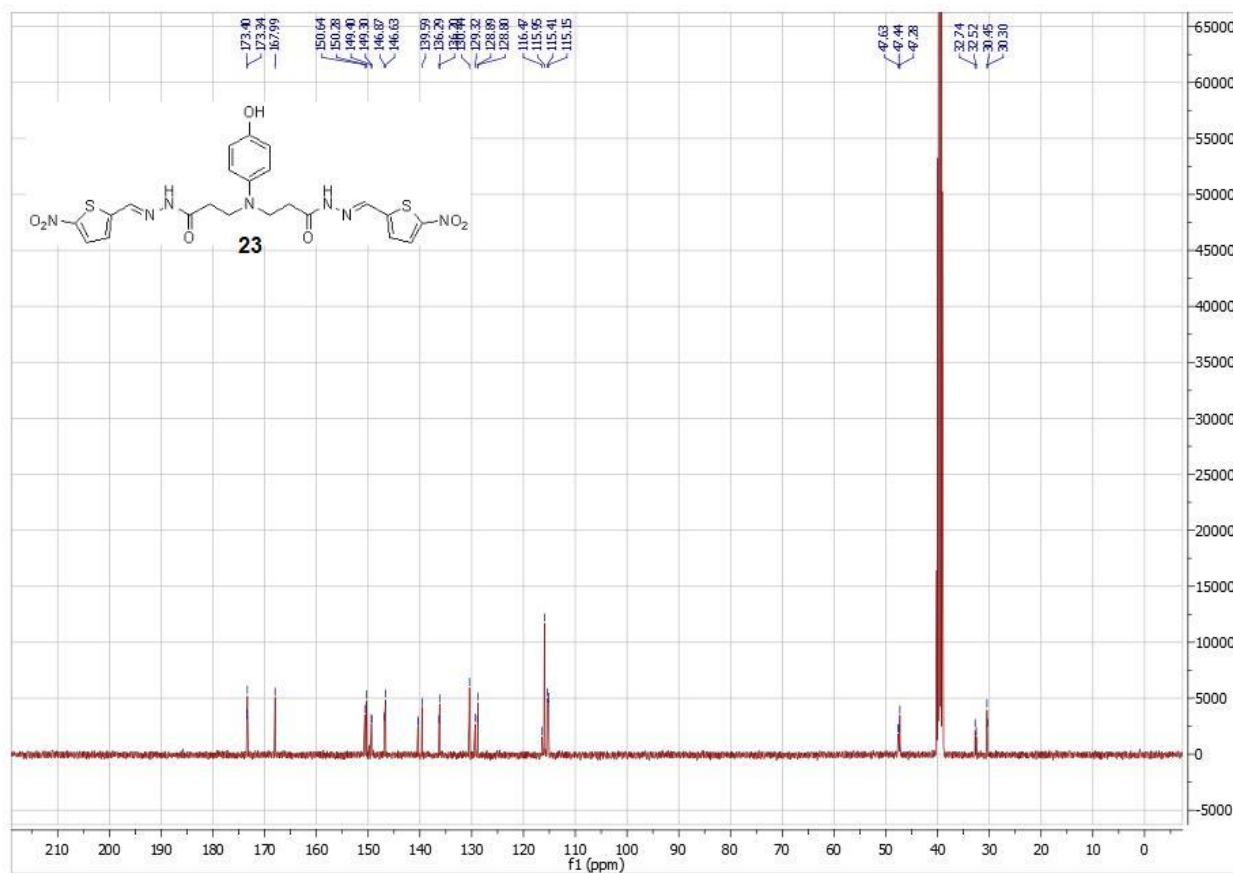

Figure S38. <sup>13</sup>C NMR spectrum of compound **23**

3,3'-((4-Hydroxyphenyl)azanediyl)bis(N'-((5-nitrofuran-2-yl)methylene)propanehydrazide) (**24**)

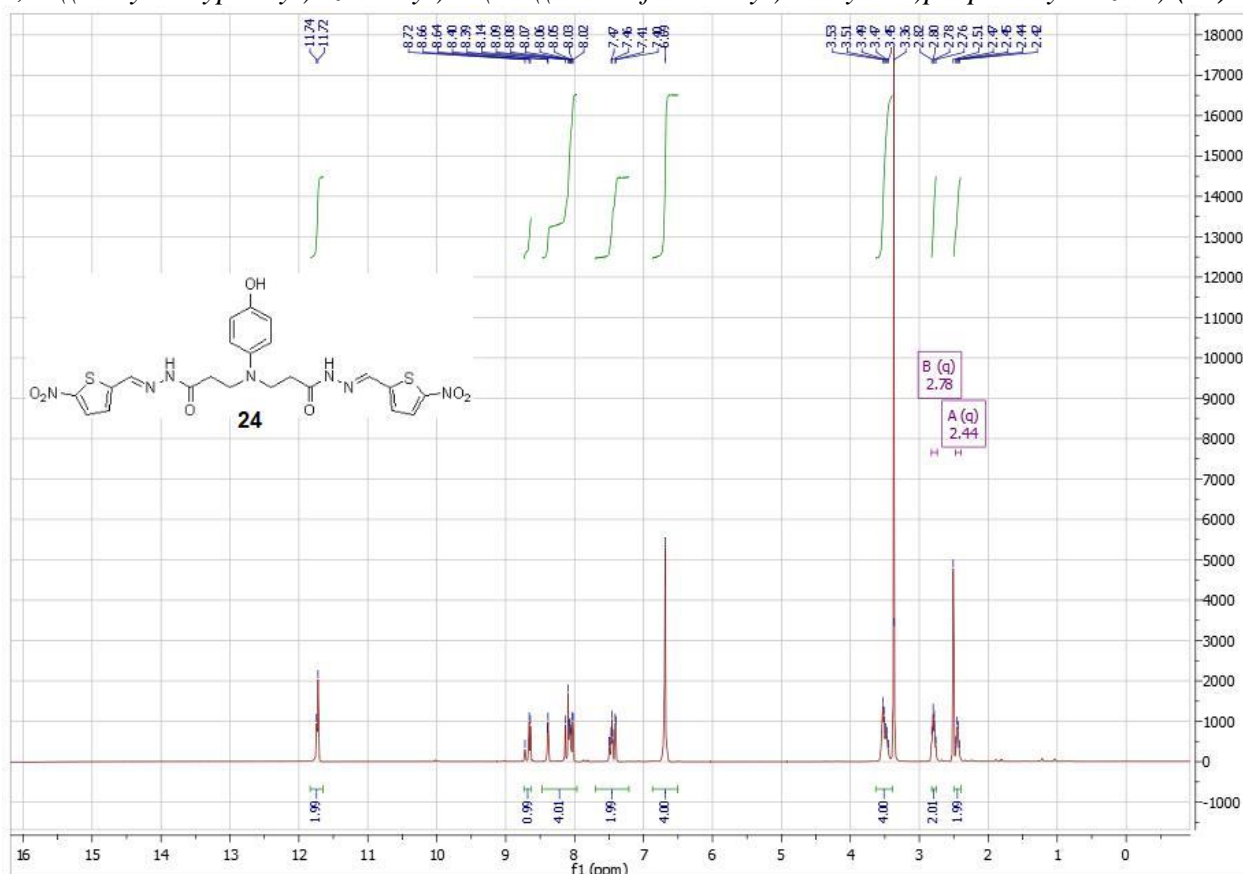

Figure S39. <sup>1</sup>H NMR spectrum of compound **24**

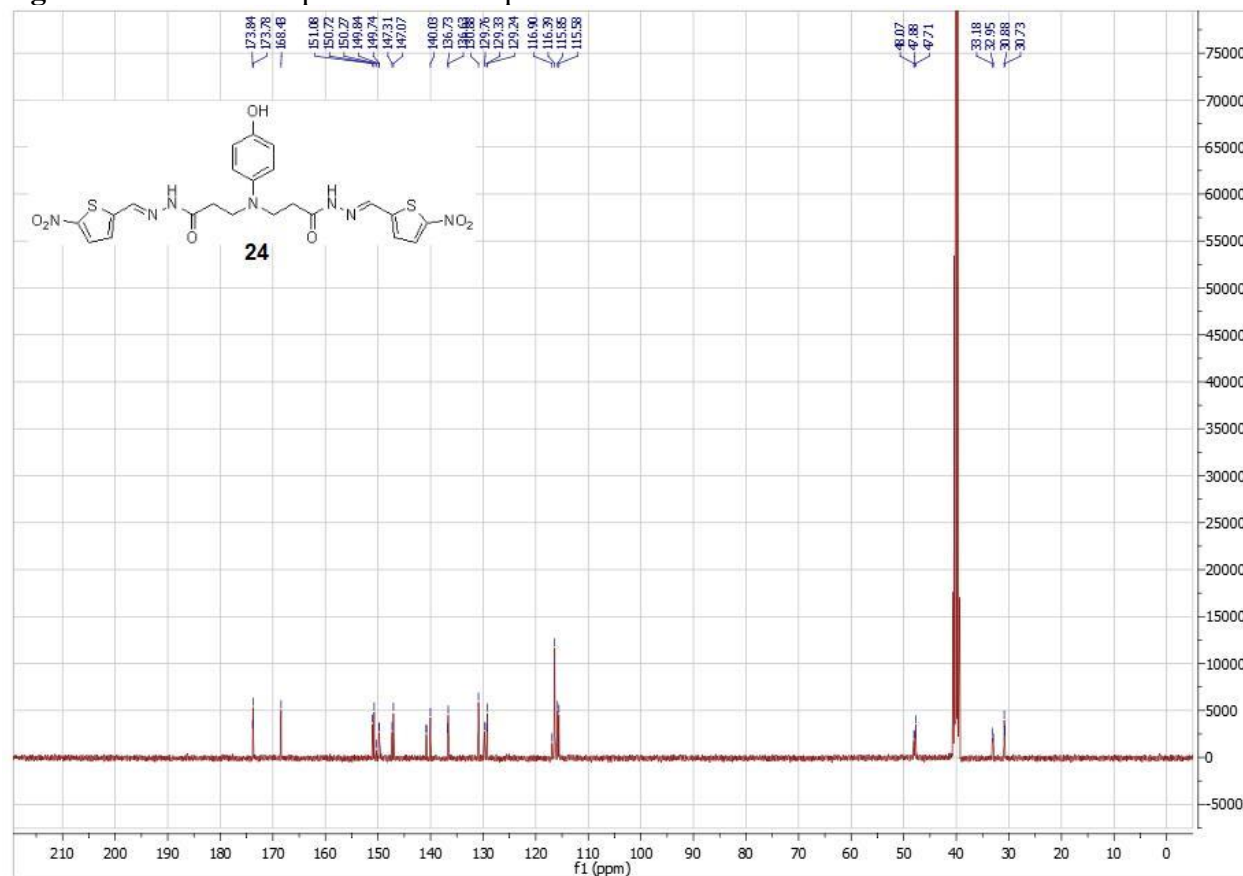

Figure S40. <sup>13</sup>C NMR spectrum of compound **24**



3,3'-((4-Hydroxyphenyl)azanediyl)bis(N'-(thien-3-ylmethylene)propanehydrazide) (**25**)

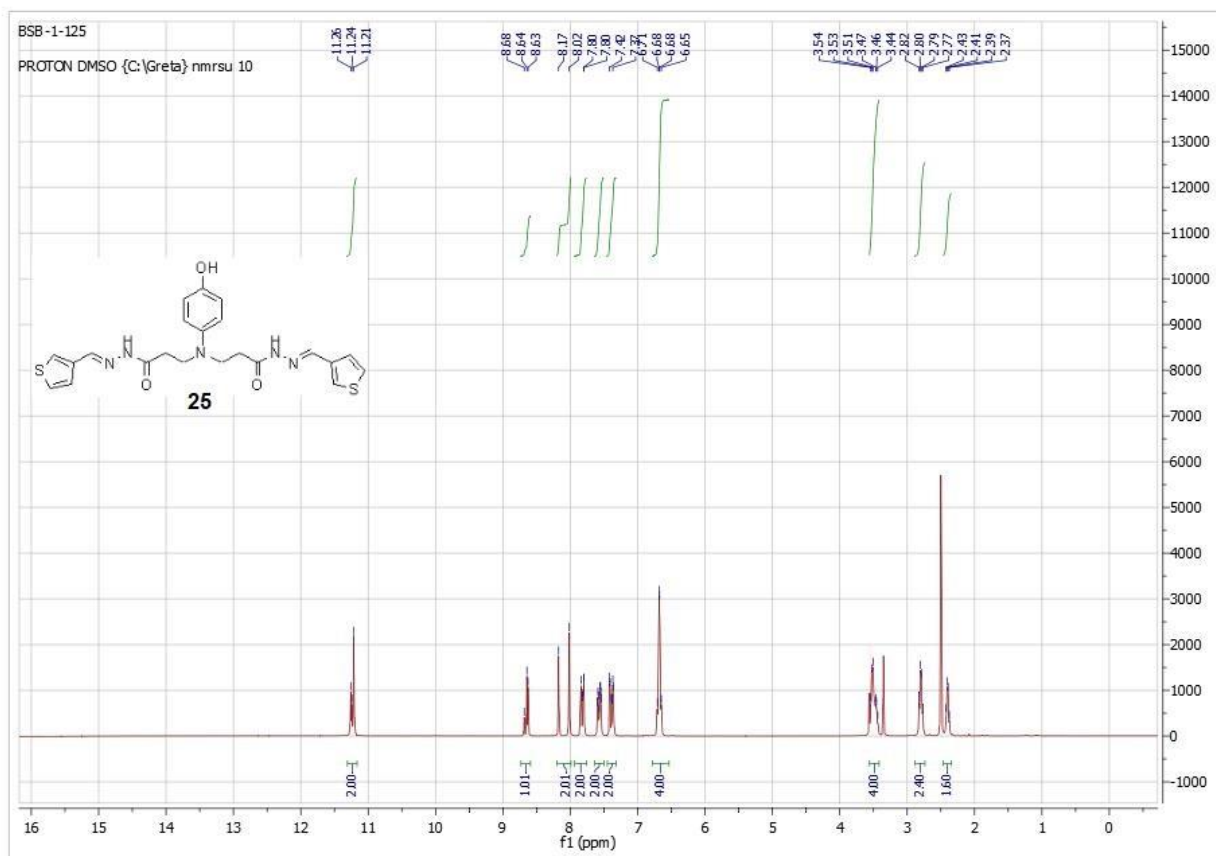

Figure S41. <sup>1</sup>H NMR spectrum of compound **25**

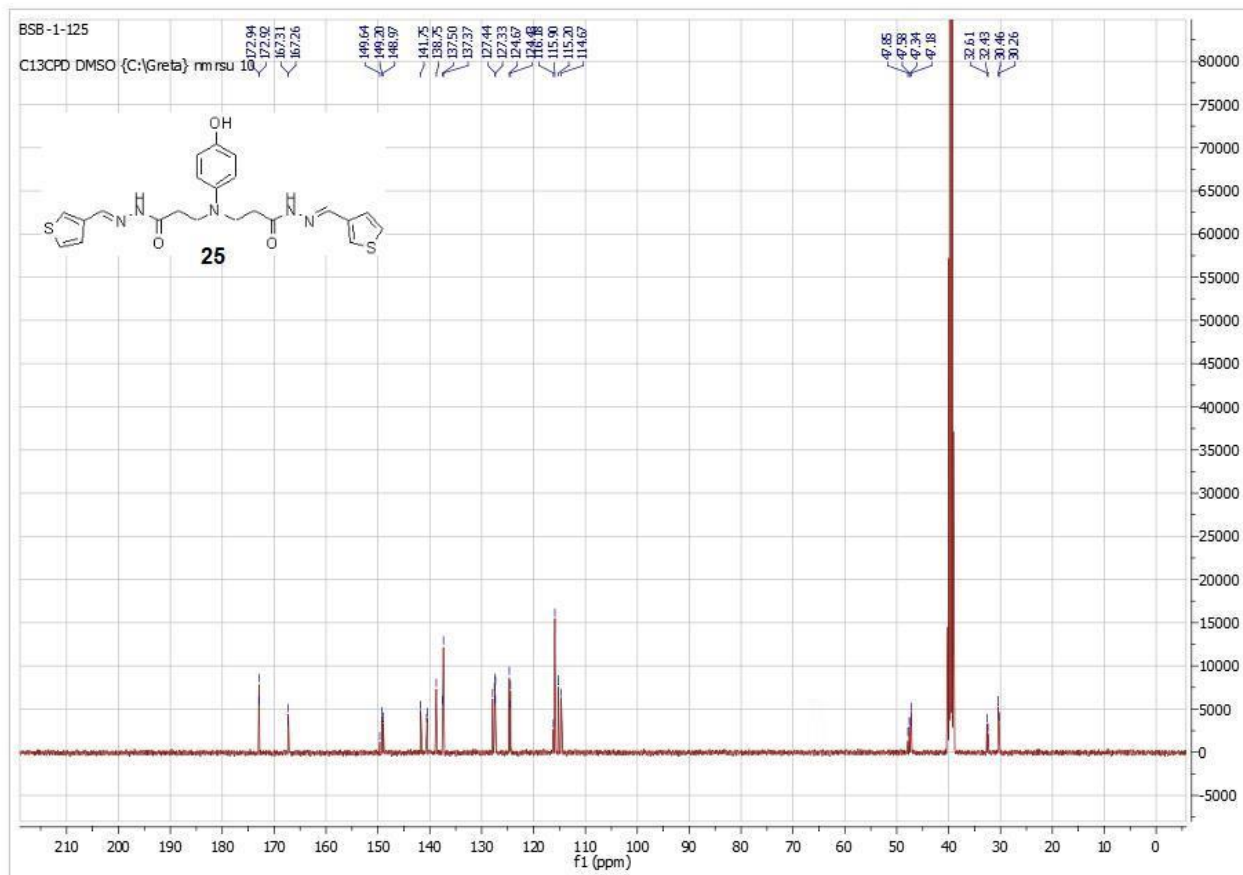

Figure S42. <sup>13</sup>C NMR spectrum of compound **25**

3,3'-((4-Hydroxyphenyl)azanediyl)bis(*N'*-(propan-2-ylidene)propanehydrazide) (**26**)

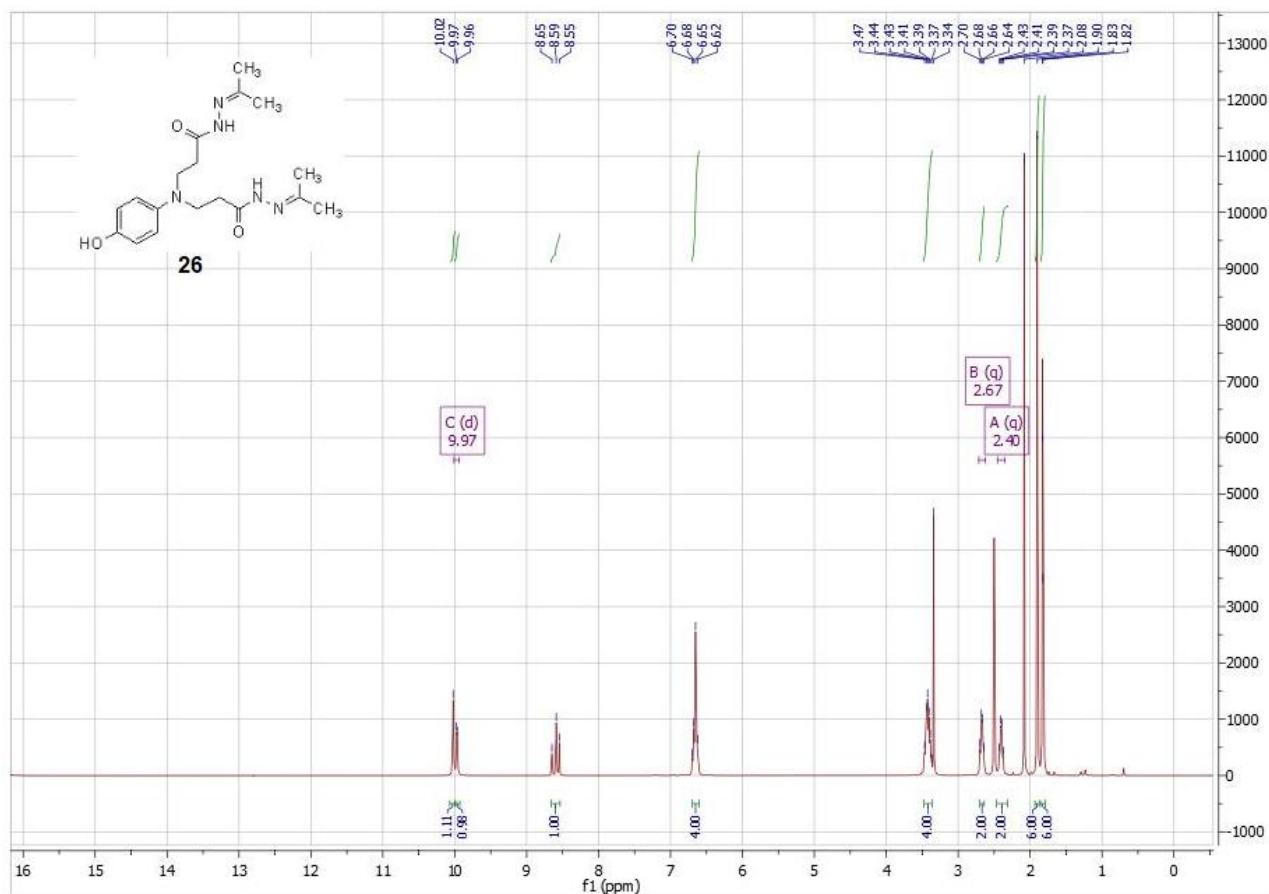

Figure S43. <sup>1</sup>H NMR spectrum of compound **26**

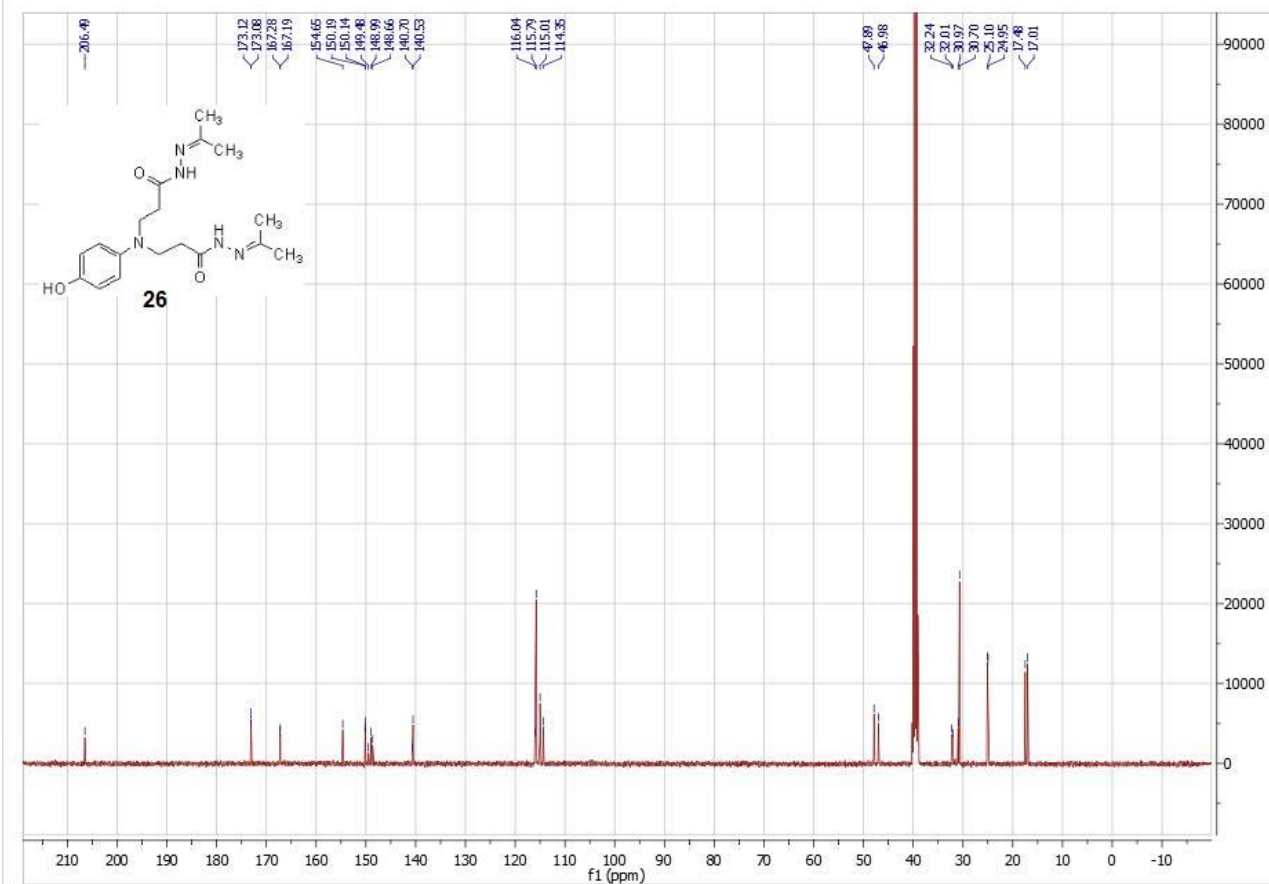

Figure S44. <sup>13</sup>C NMR spectrum of compound **26**

3,3'-((4-Hydroxyphenyl)azanediyl)bis(*N*'-(butan-2-ylidene)propanehydrazide) (**27**)

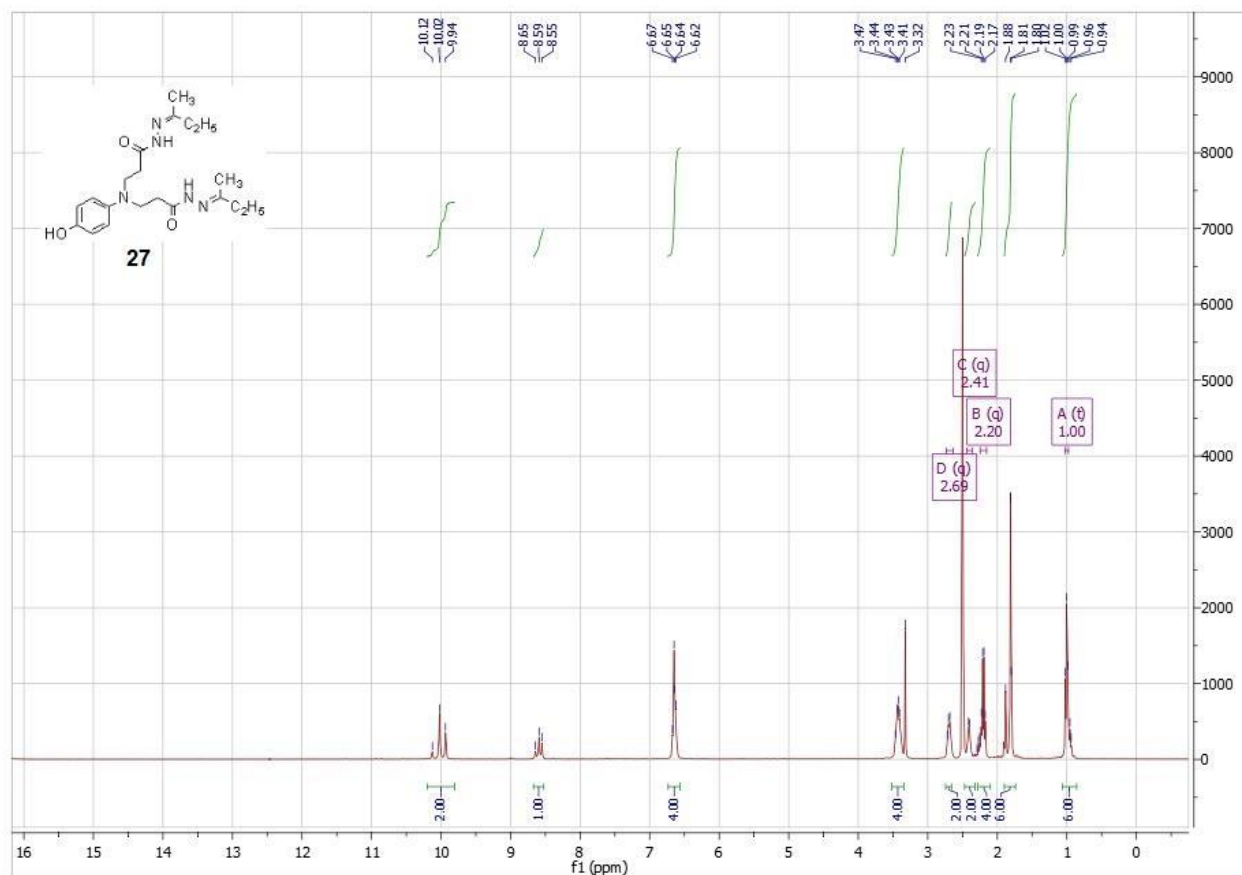

Figure S45. <sup>1</sup>H NMR spectrum of compound **27**

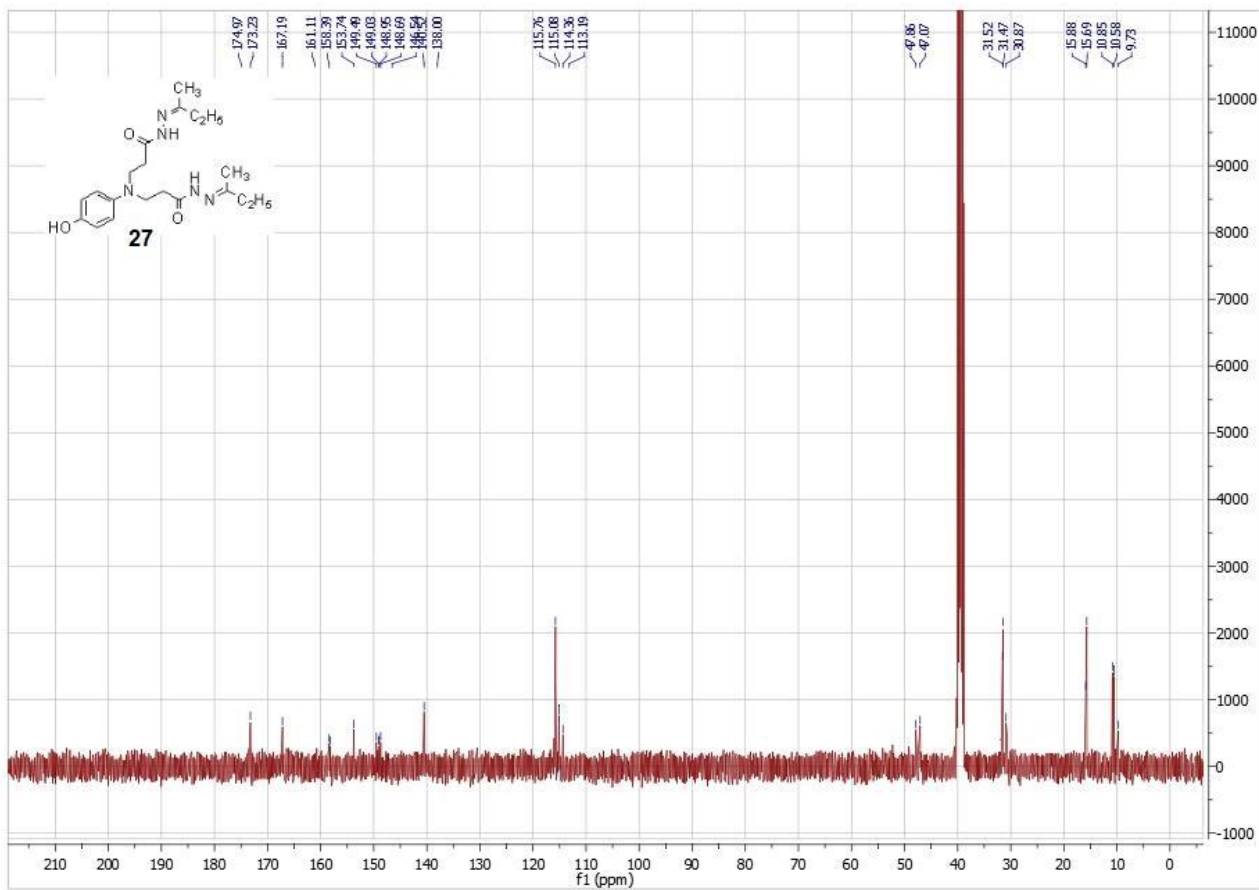

Figure S46. <sup>13</sup>C NMR spectrum of compound **27**



3,3'-((4-Hydroxyphenyl)azanediyl)bis(*N'*-(1-phenylethylidene)propanehydrazide) (**28**)

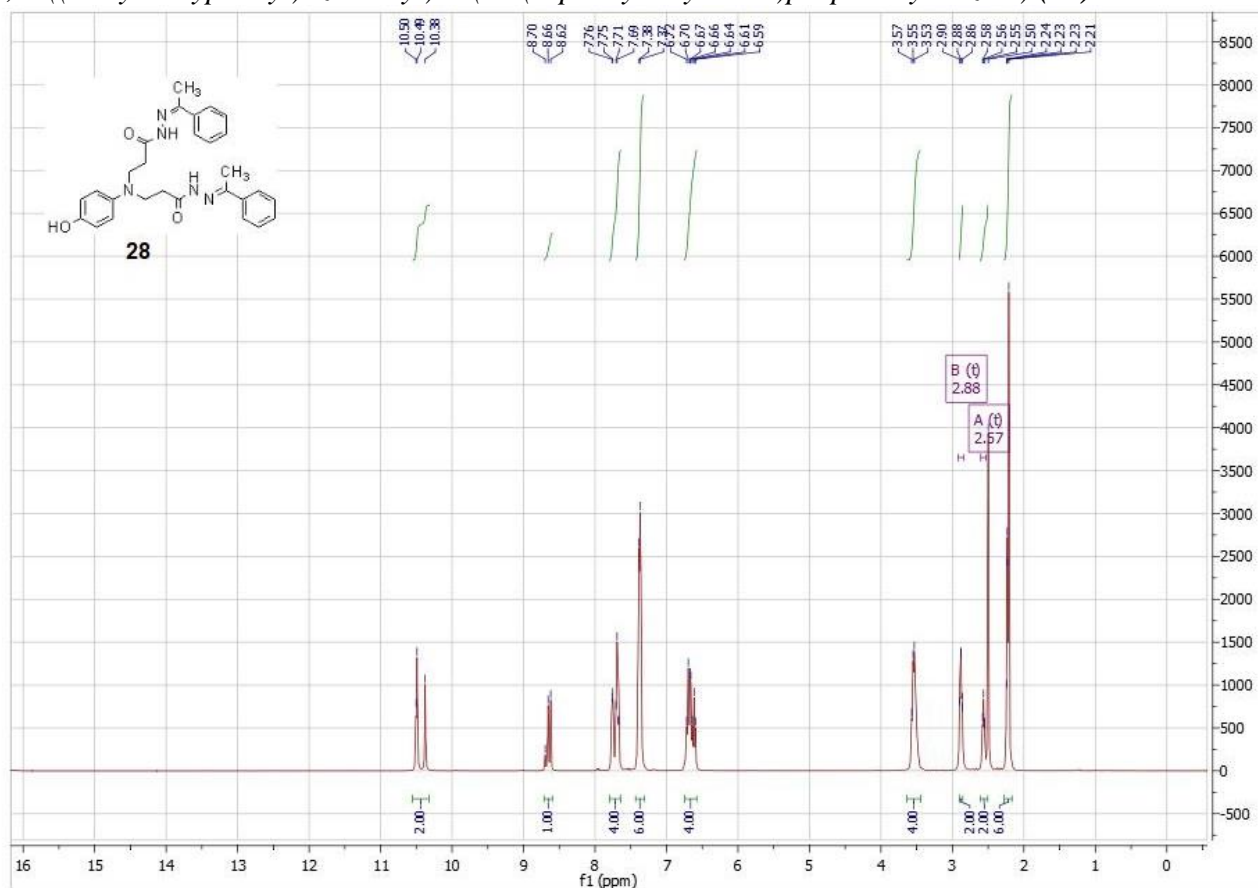

Figure S47. <sup>1</sup>H NMR spectrum of compound **28**

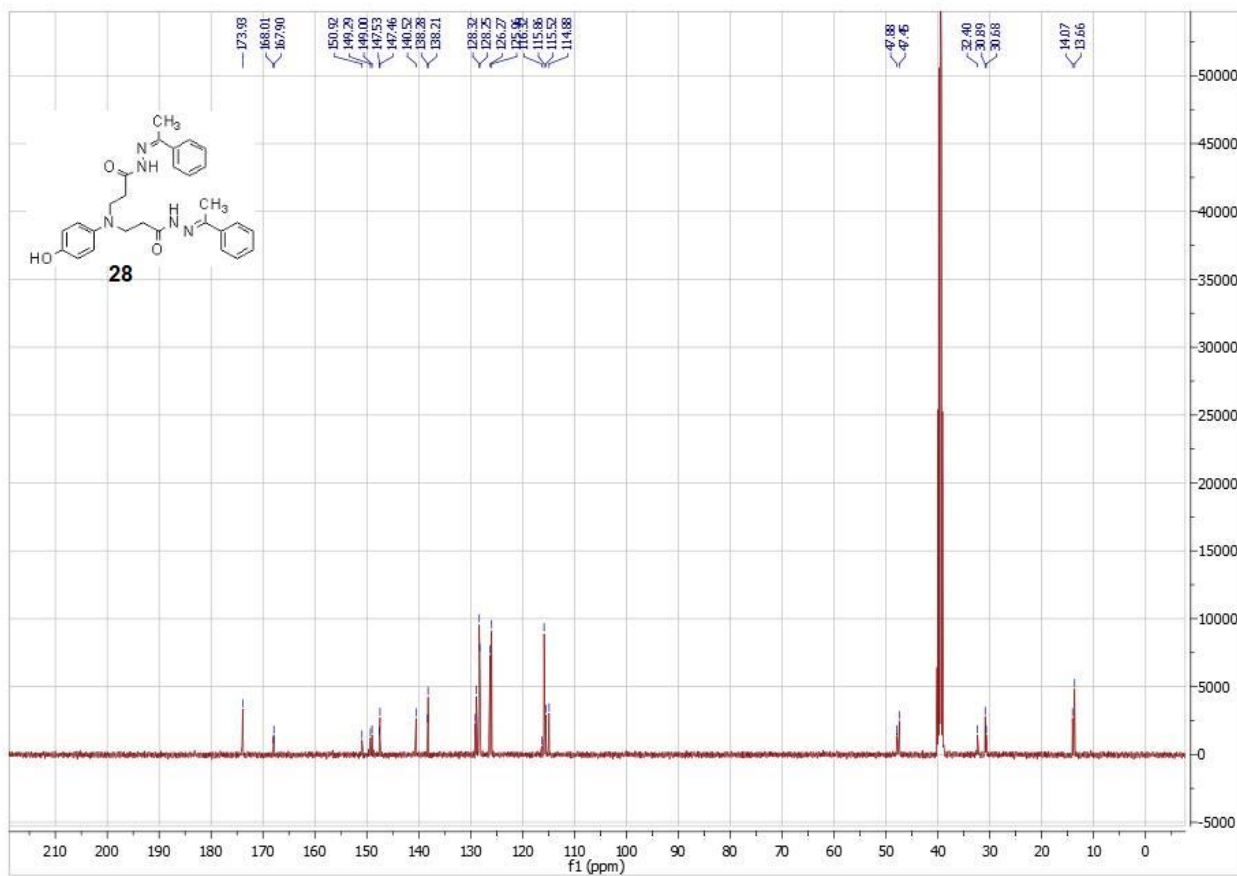

Figure S48. <sup>13</sup>C NMR spectrum of compound **28**

3,3'-((4-Hydroxyphenyl)azanediyl)bis(*N'*-(benzylidene)propanehydrazide) (**29**)

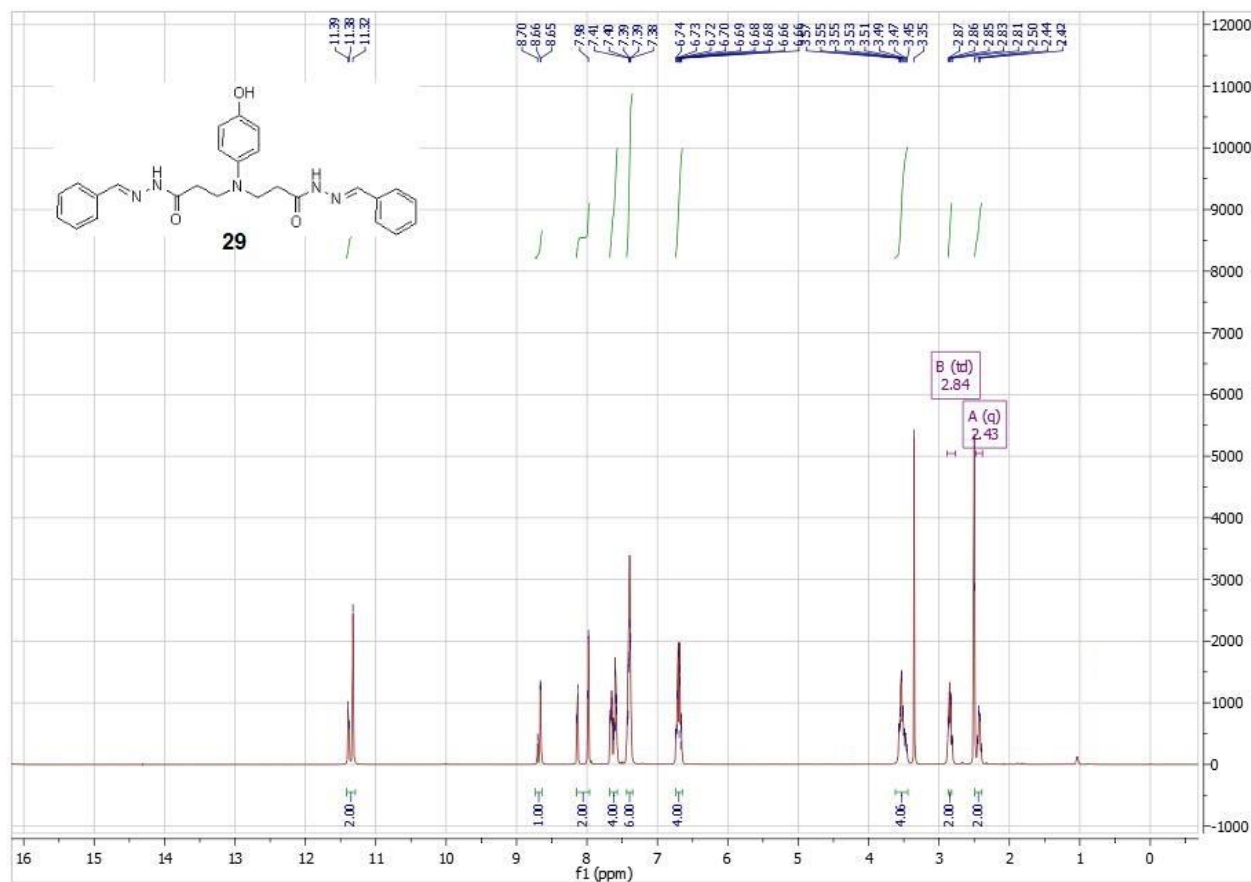

Figure S49. <sup>1</sup>H NMR spectrum of compound **29**

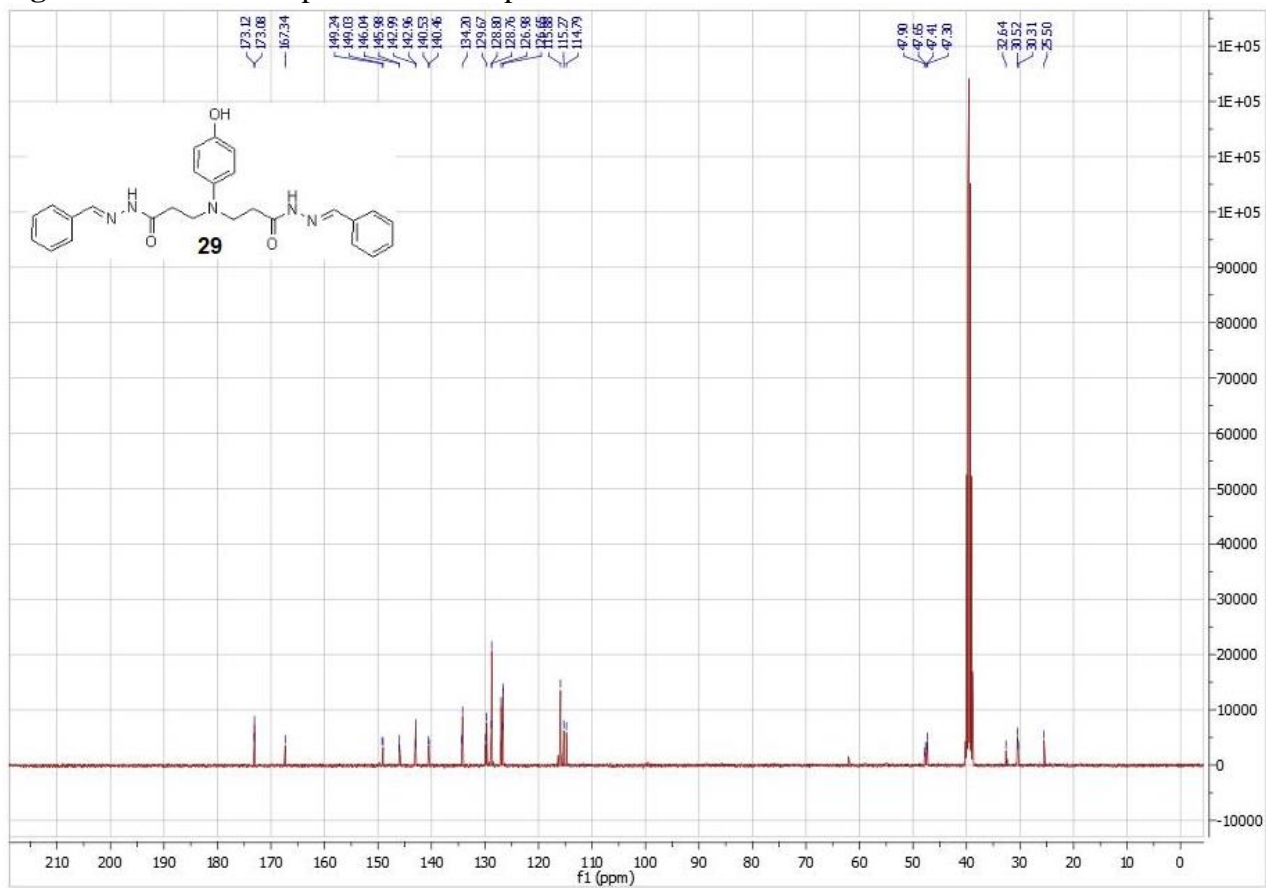

Figure S50. <sup>13</sup>C NMR spectrum of compound **29**

3,3'-((4-Hydroxyphenyl)azanediyl)bis(N'-(4-nitrobenzylidene)propanehydrazide) (**30**)

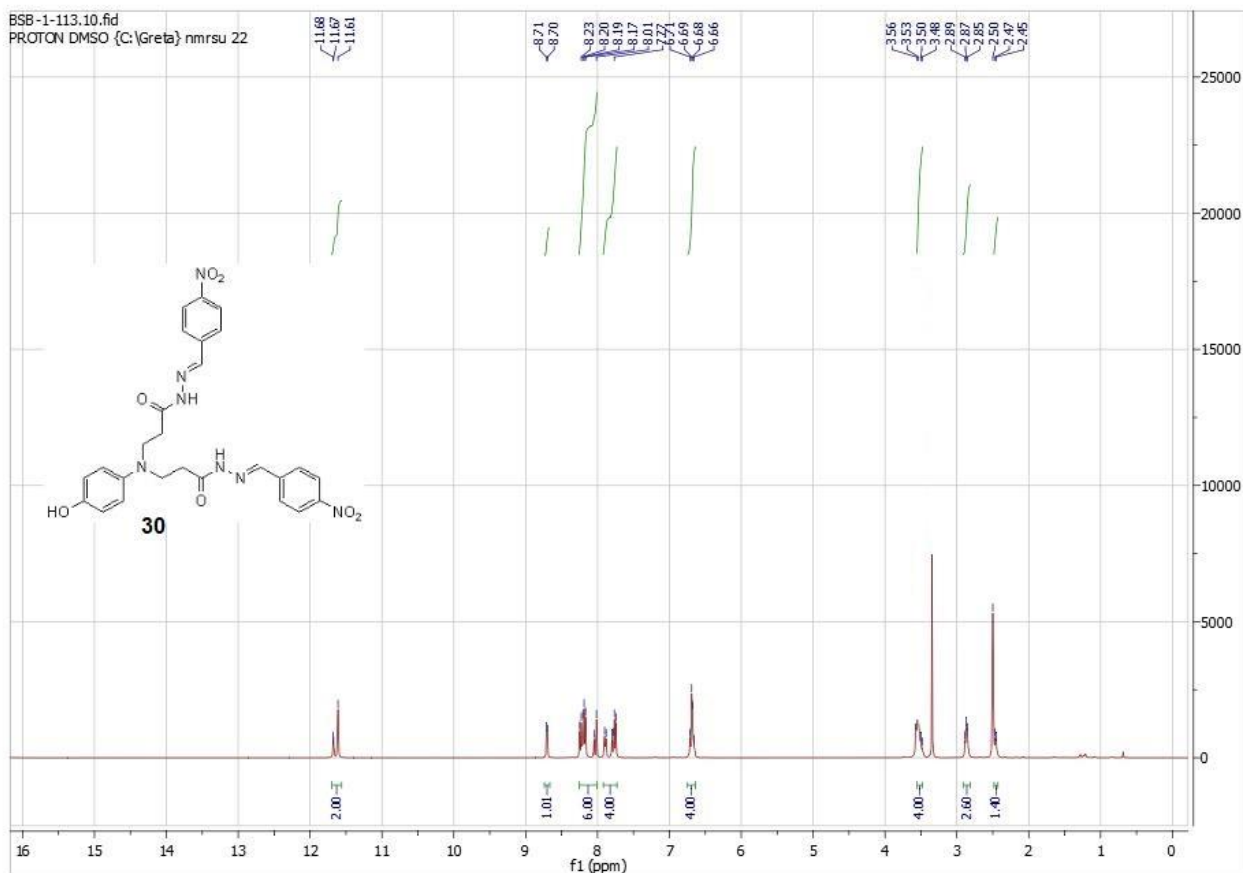

Figure S51.  $^1\text{H}$  NMR spectrum of compound **30**

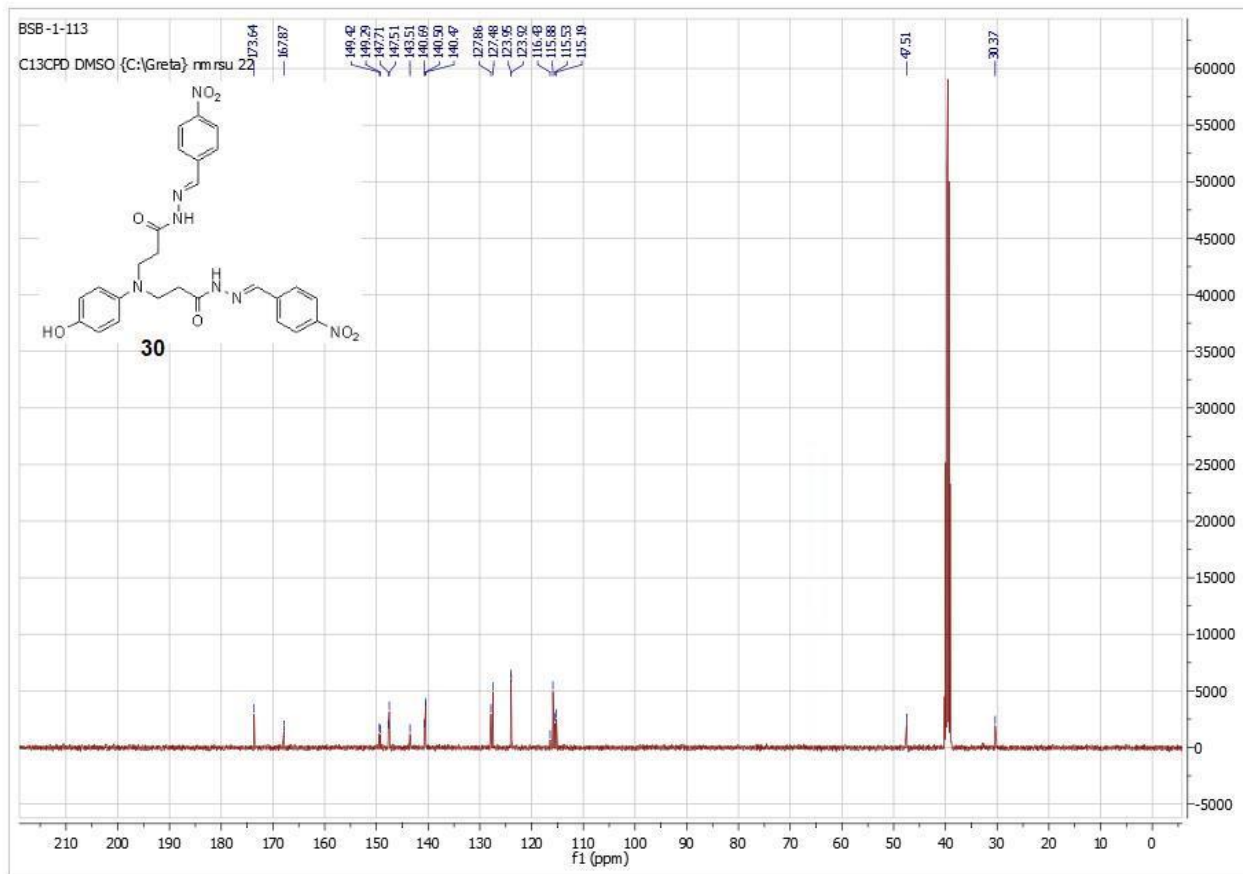

Figure S52.  $^{13}\text{C}$  NMR spectrum of compound **30**

3,3'-((4-Hydroxyphenyl)azanediyl)bis(*N*'-(benzylidene)propanehydrazide) (**31**)

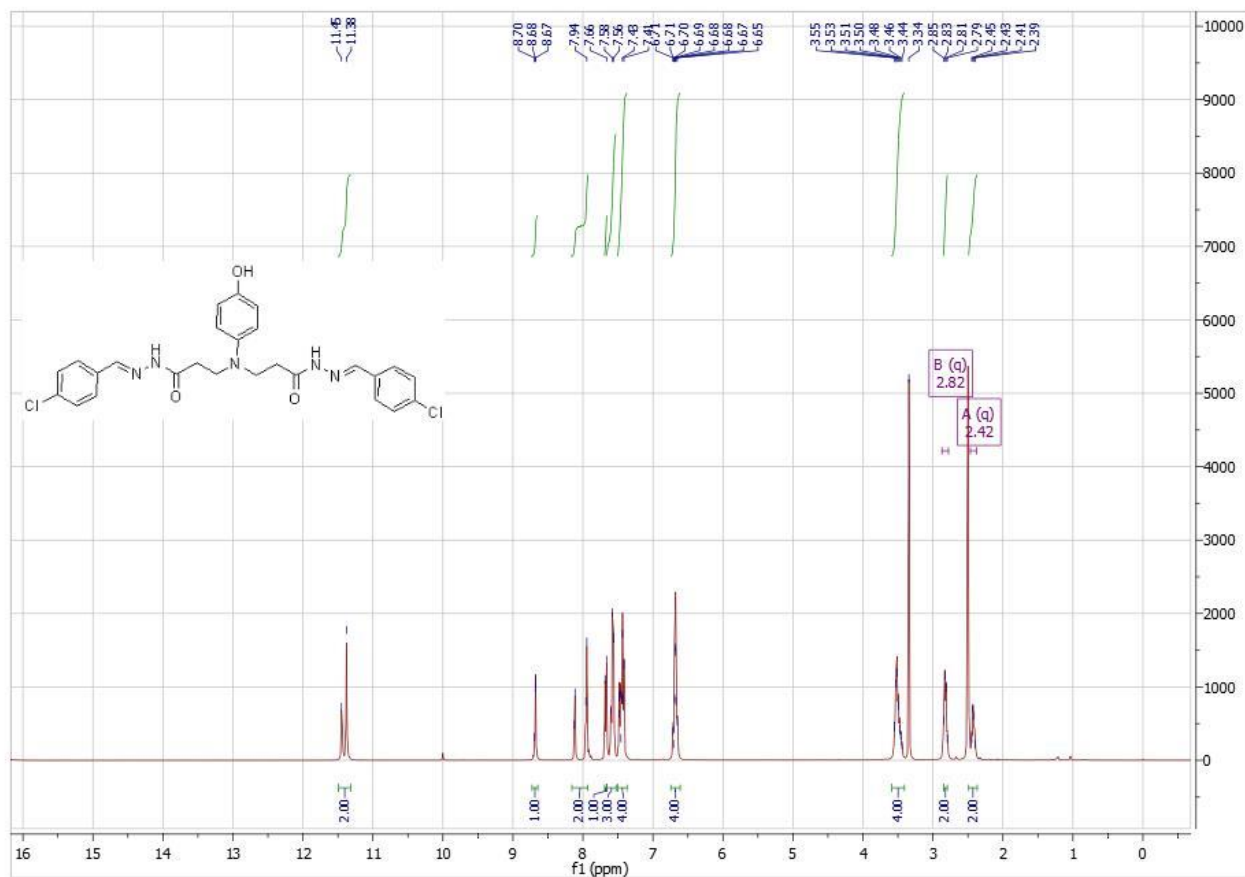

Figure S53. <sup>1</sup>H NMR spectrum of compound **31**

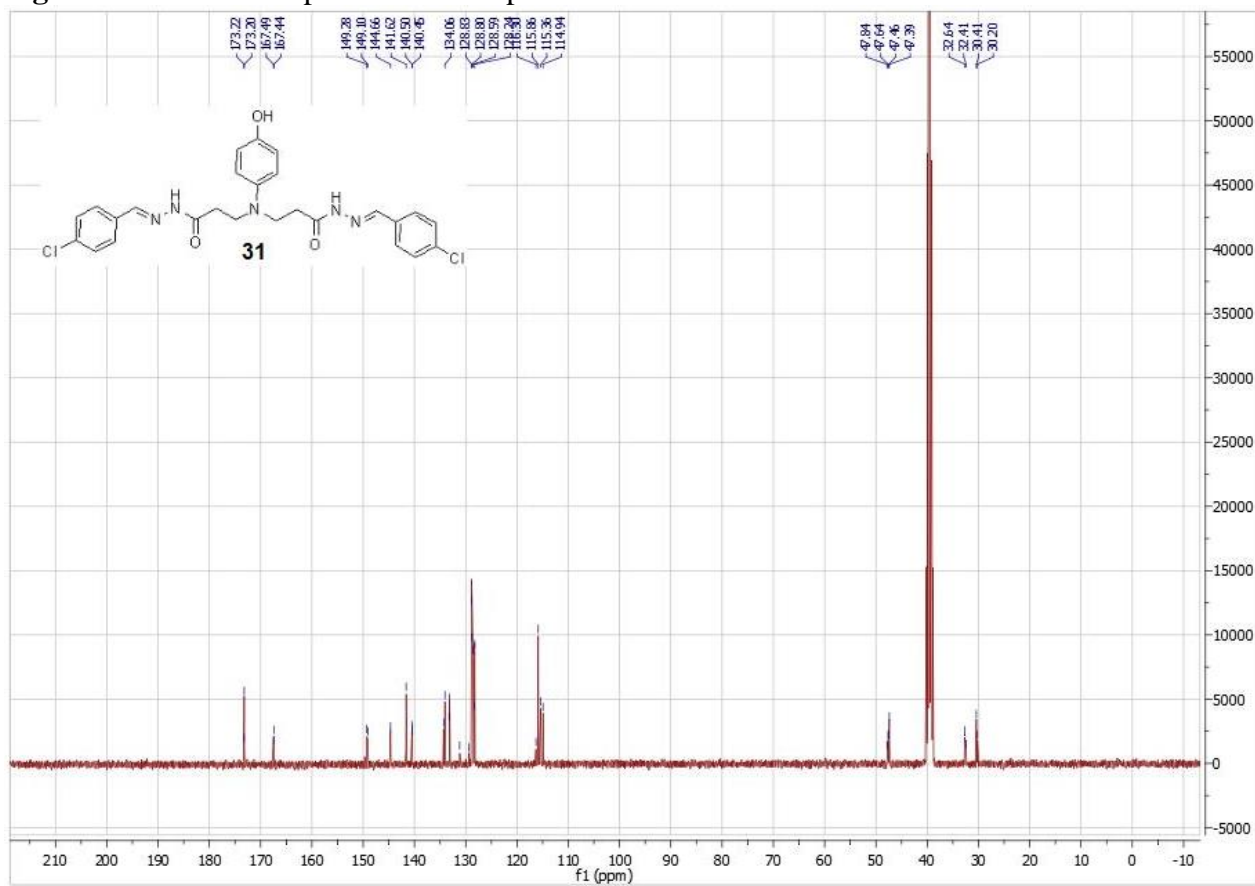

Figure S54. <sup>13</sup>C NMR spectrum of compound **31**

3,3'-((4-Hydroxyphenyl)azanediyl)bis(*N*'-(4-(dimethylamino)benzylidene)propanehydrazide) (**32**)

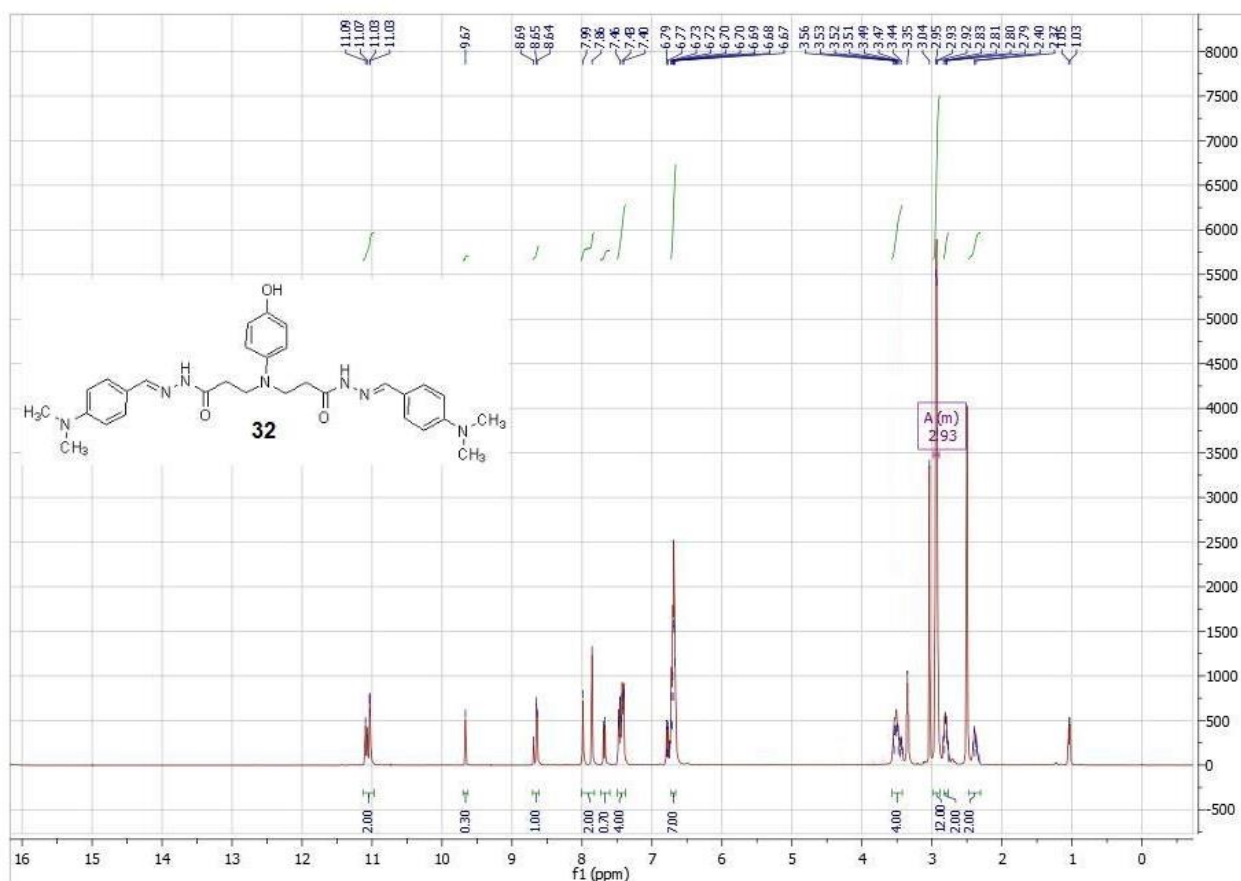

Figure S55. <sup>1</sup>H NMR spectrum of compound **32**

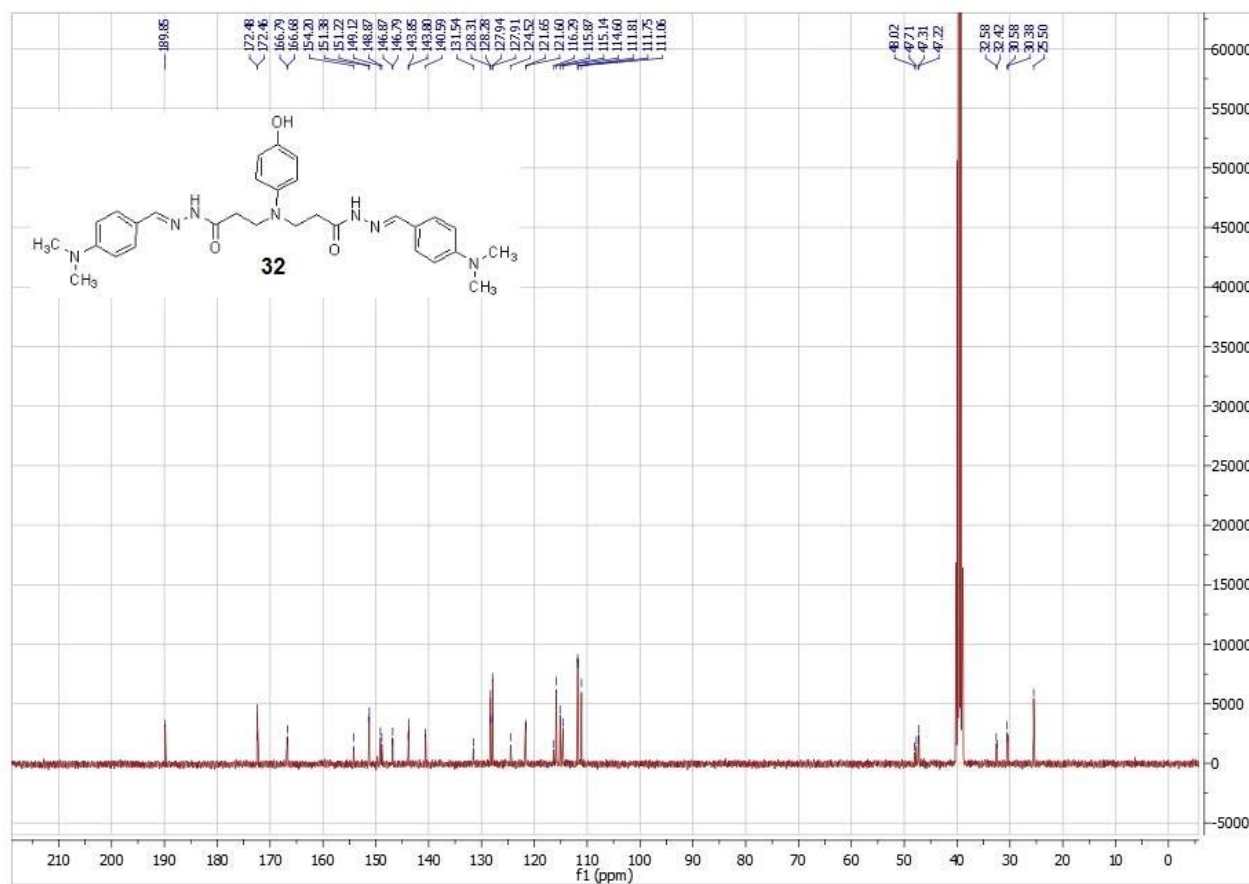

Figure S56. <sup>13</sup>C NMR spectrum of compound **32**



3,3'-((4-Hydroxyphenyl)azanediyl)bis(*N'*-(4-hydroxybenzylidene)propanehydrazide) (**33**)

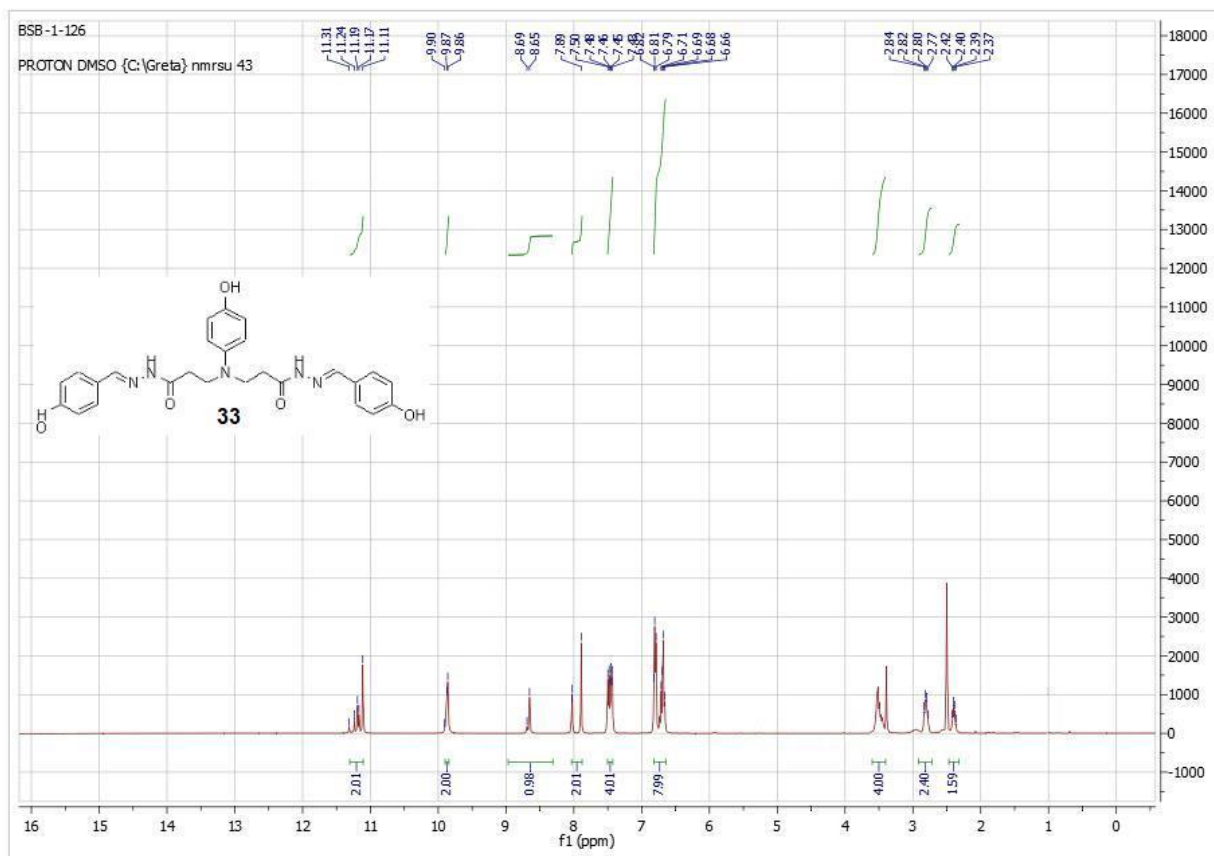

Figure S57. <sup>1</sup>H NMR spectrum of compound **33**

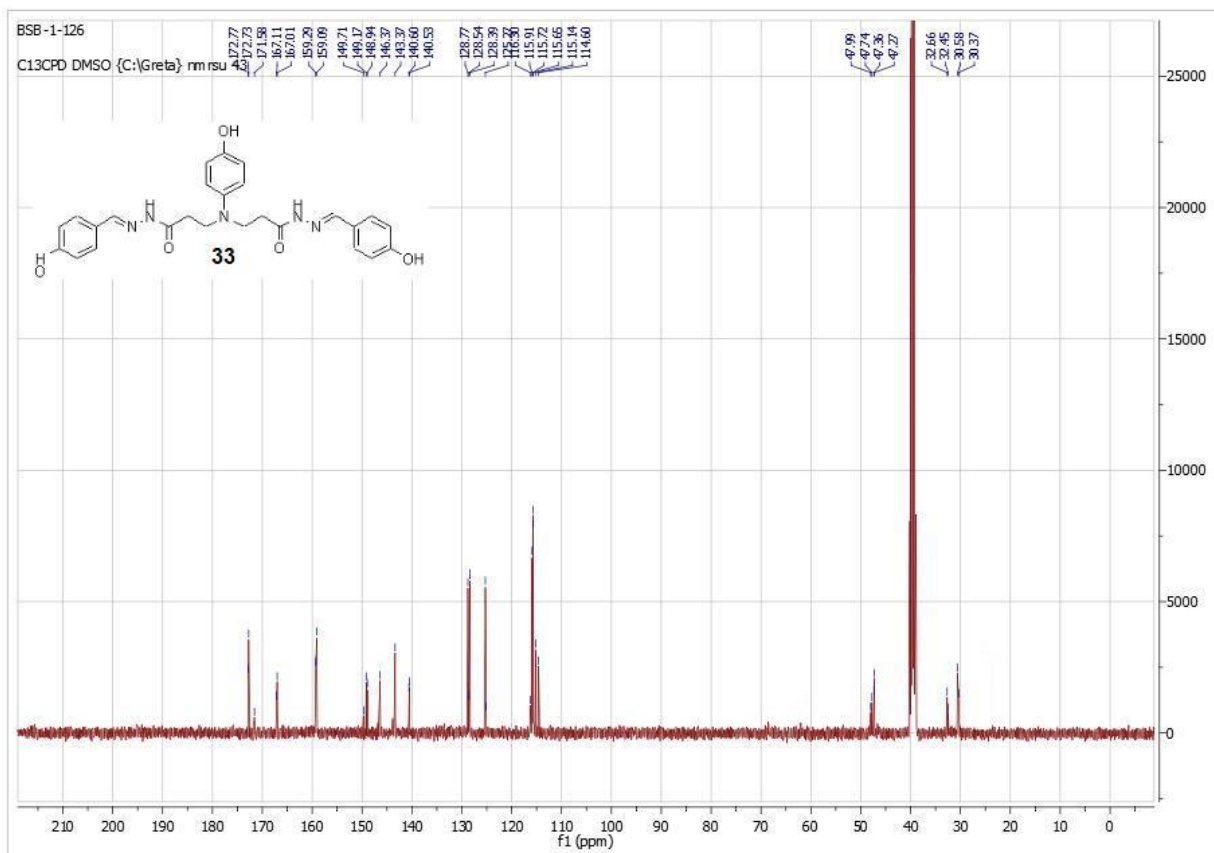

Figure S58. <sup>13</sup>C NMR spectrum of compound **33**

3,3'-((4-Hydroxyphenyl)azanediyl)bis(*N*'-(3,4,5-trimethoxybenzylidene)propanehydrazide) (**34**)

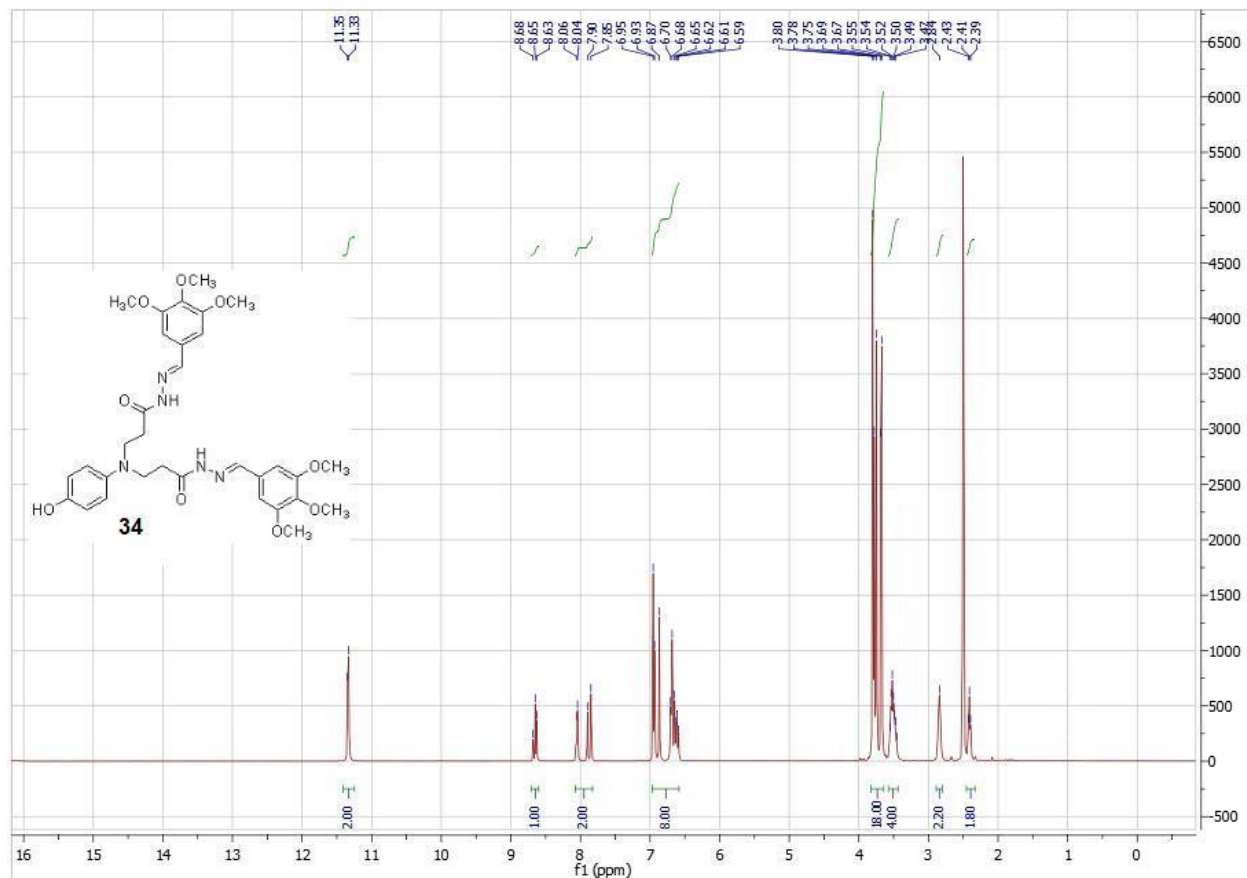

Figure S59. <sup>1</sup>H NMR spectrum of compound **34**

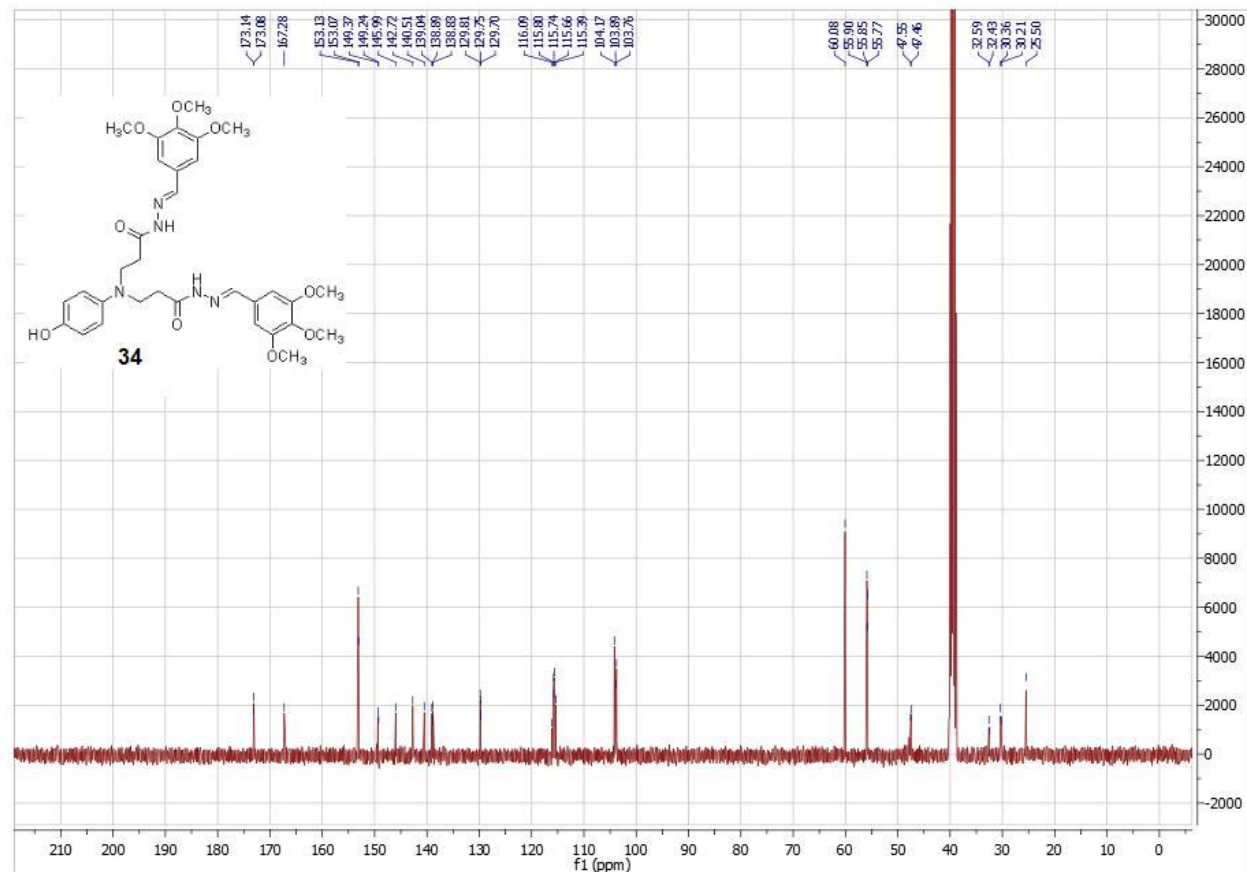

Figure S60. <sup>13</sup>C NMR spectrum of compound **34**

3,3'-((4-Hydroxyphenyl)azanediyl)bis(*N'*-(naphthalen-1-ylmethylene)propanehydrazide) (**35**)

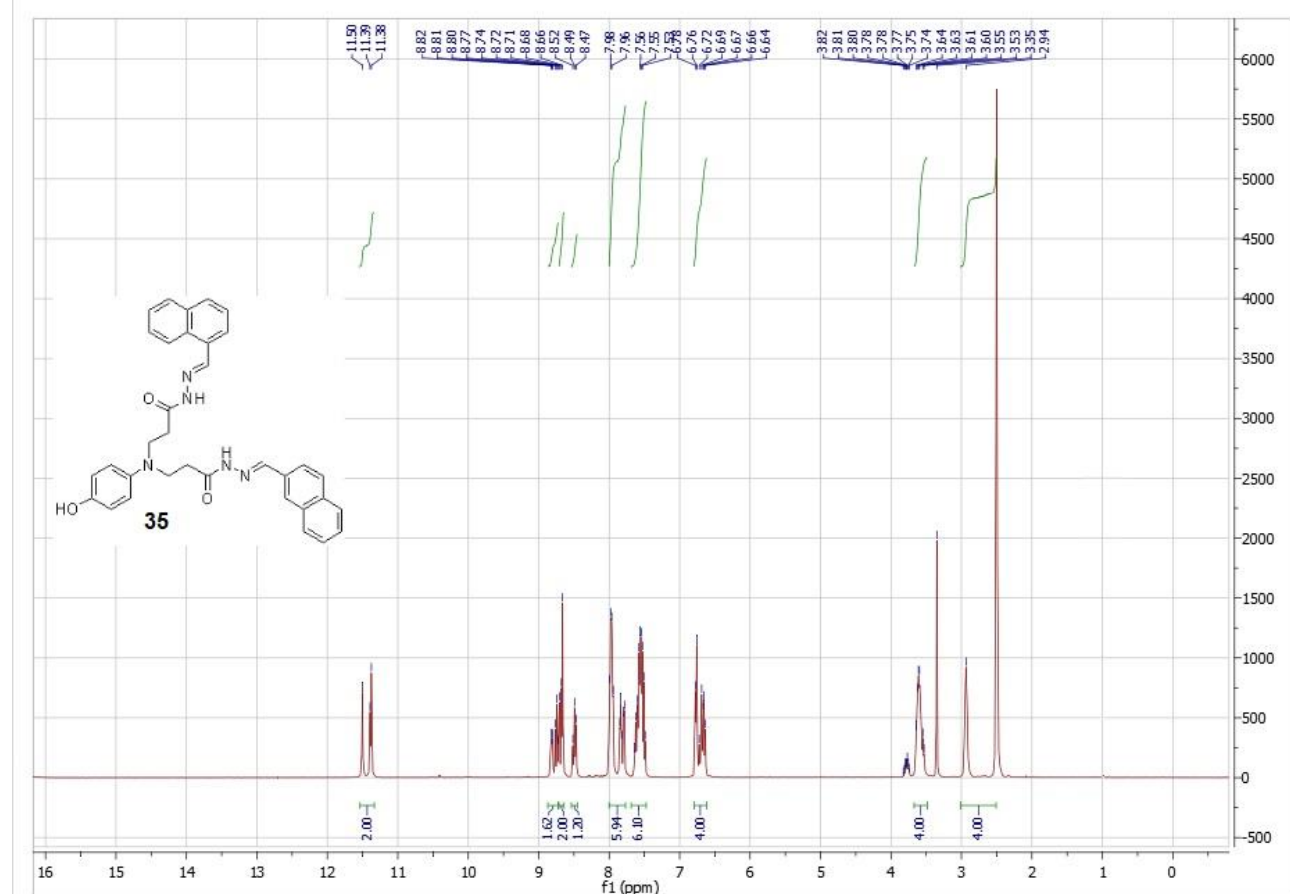

Figure S61. <sup>1</sup>H NMR spectrum of compound **35**

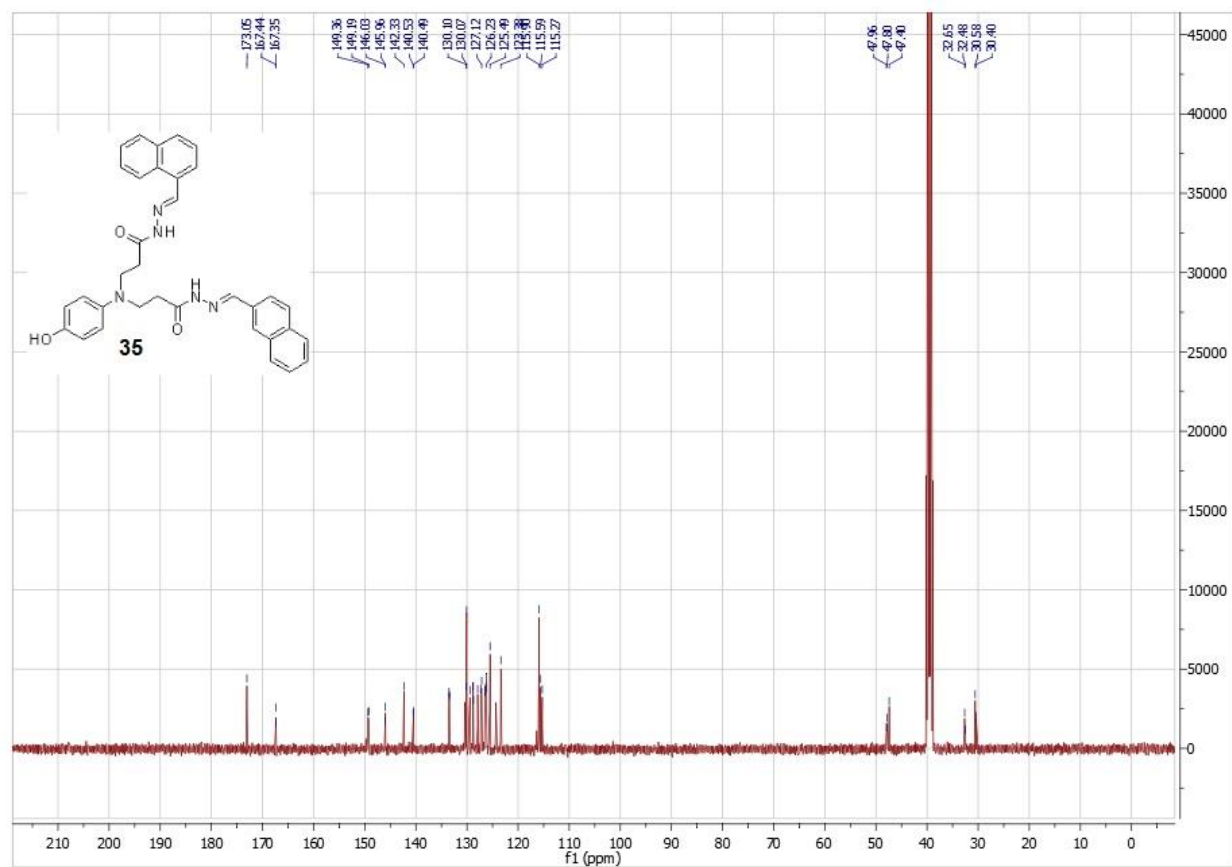

Figure S62. <sup>13</sup>C NMR spectrum of compound **35**



**3,3'-((4-Hydroxyphenyl)azanediyl)bis(1-(3,5-dimethyl-1H-pyrazol-1-yl)propan-1-one) (36)**

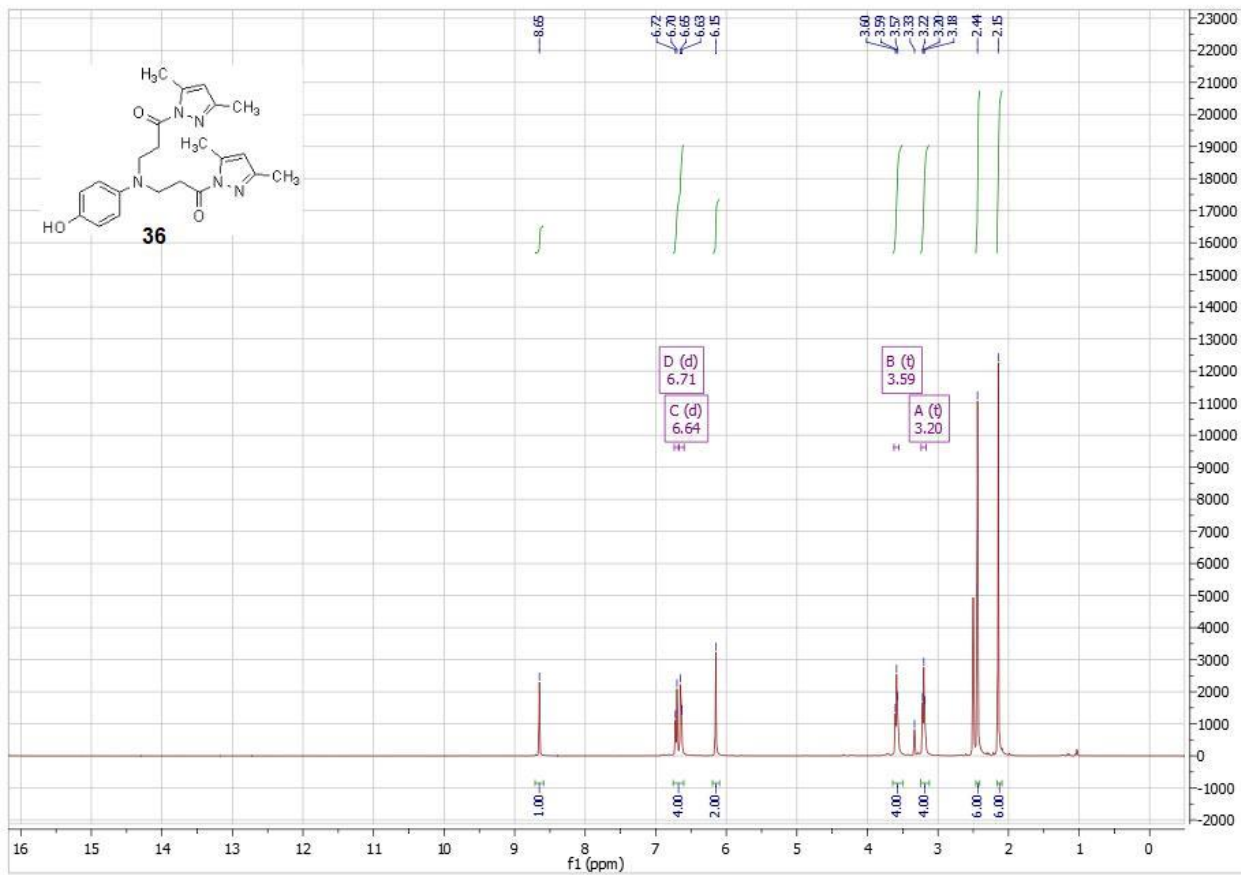

**Figure S63.**  $^1\text{H}$  NMR spectrum of compound **36**

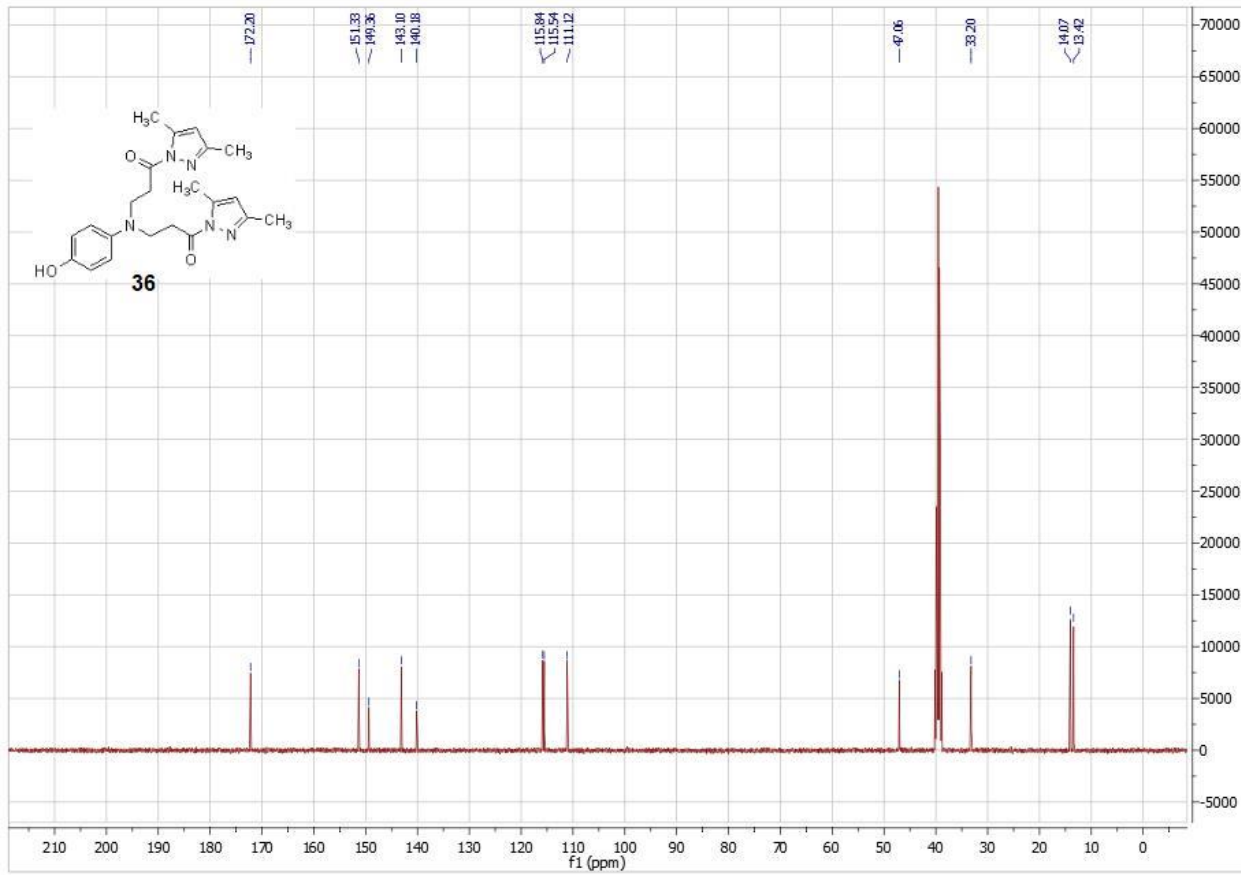

**Figure S64.**  $^{13}\text{C}$  NMR spectrum of compound **36**

3,3'-((4-Hydroxyphenyl)azanediy)bis(*N*-(2,5-dimethyl-1*H*-pyrrol-1-yl)propanamide) (**37**)

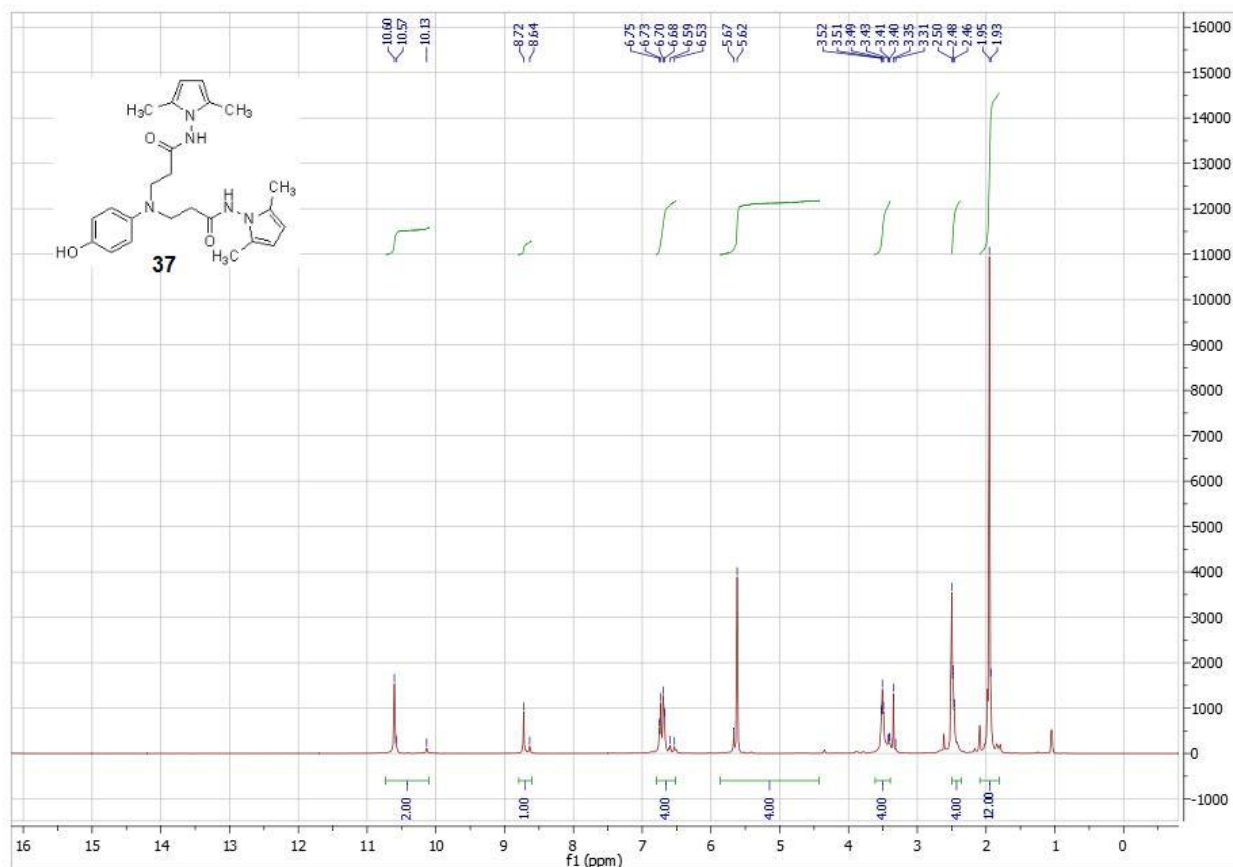

Figure S65. <sup>1</sup>H NMR spectrum of compound **37**

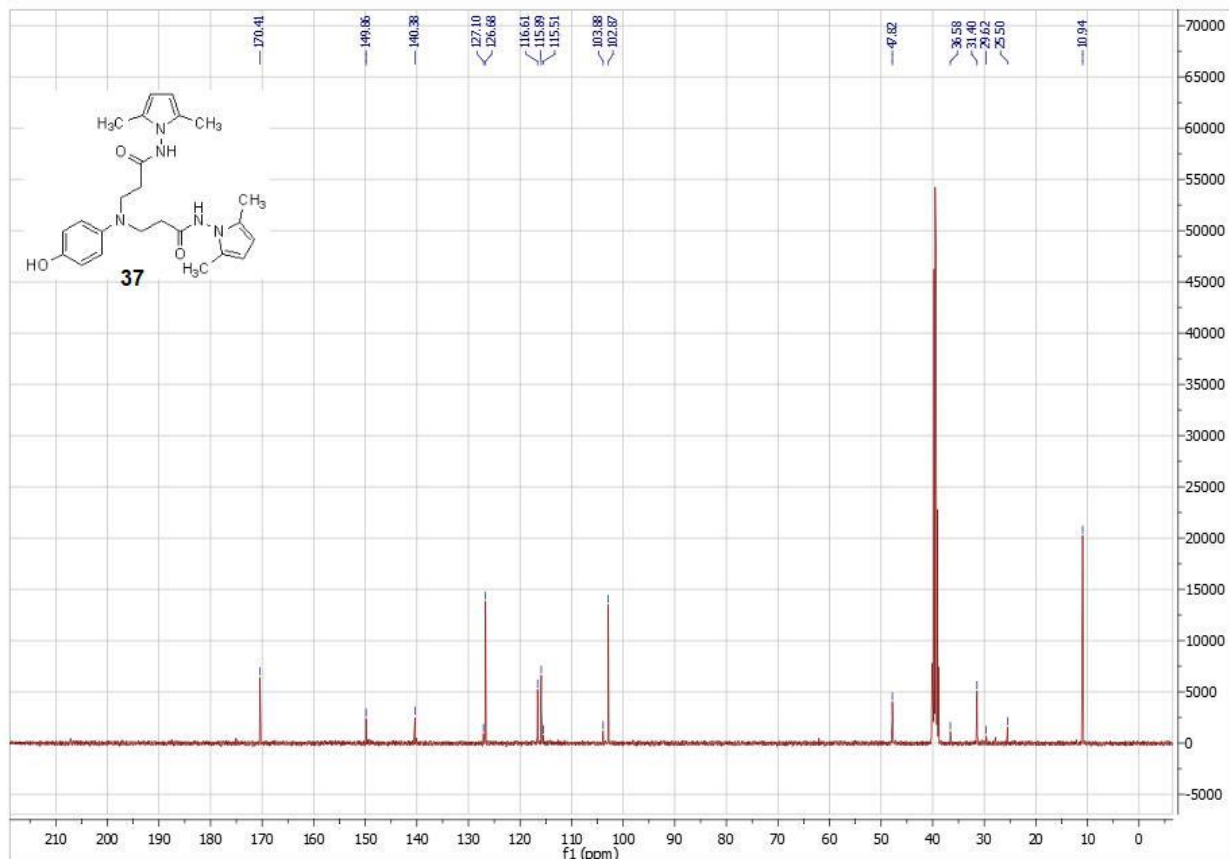

Figure S66. <sup>13</sup>C NMR spectrum of compound **37**

**Acquisition Parameter**

|             |            |                       |           |                  |           |
|-------------|------------|-----------------------|-----------|------------------|-----------|
| Source Type | ESI        | Ion Polarity          | Positive  | Set Nebulizer    | 1.5 Bar   |
| Focus       | Not active | Set Capillary         | 4500 V    | Set Dry Heater   | 180 °C    |
| Scan Begin  | 40 m/z     | Set End Plate Offset  | -500 V    | Set Dry Gas      | 8.0 l/min |
| Scan End    | 1800 m/z   | Set Collision Cell RF | 350.0 Vpp | Set Divert Valve | Waste     |

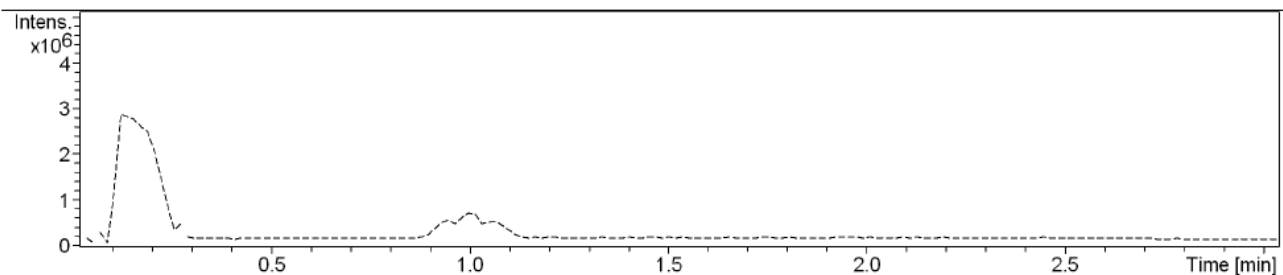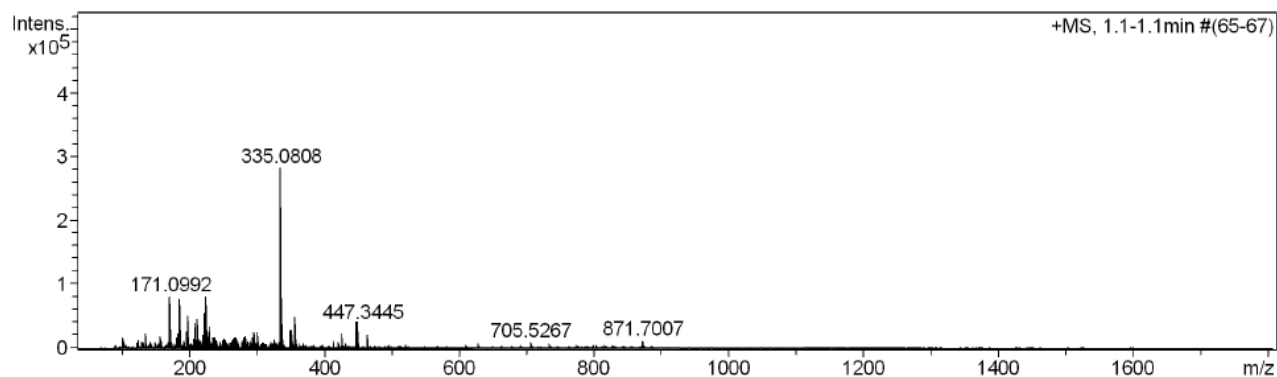

**Figure S67:** Mass spectrum of compound **15**
